# Supplementary material for: Direct oxidation of N-ynylsulfonamides into N-sulfonyloxoacetamides with DMSO as a nucleophilic oxidant
Source: Royal Society of Chemistry journal article supplement (doi:10.1039/d1ra04816c), 2021-01-01
Supplement: d1ra04816c1.pdf [file d1ra04816c1.pdf]

## Direct oxidation of *N*-nylsulfonamides into *N*-sulfonyloxoacetamides with DMSO as a nucleophilic oxidant

Jun Dong,<sup>a,b</sup> Duo Fu,<sup>a</sup> Dongning Sheng,<sup>a</sup> Jiayi Wang,<sup>a</sup> and Jiaxi Xu<sup>a\*</sup>

<sup>a</sup>State Key Laboratory of Chemical Resource Engineering, Department of Organic Chemistry, College of Chemistry, Beijing University of Chemical Technology, Beijing 100029, People's Republic of China E-mail:

[jxxu@mail.buct.edu.cn](mailto:jxxu@mail.buct.edu.cn)

<sup>b</sup>School of Chemistry and Environmental Engineering, Yancheng Teachers University, Yancheng 224007, People's Republic of China

### Electronic Supporting Information

#### Contents

|                                                                                                       |     |
|-------------------------------------------------------------------------------------------------------|-----|
| Details of calculation .....                                                                          | S2  |
| Coordinates of all stationary points.....                                                             | S3  |
| Computed energies.....                                                                                | S14 |
| Copies of <sup>1</sup> H, <sup>13</sup> C and <sup>19</sup> F NMR spectra of compounds <b>1</b> ..... | S15 |
| Copies of <sup>1</sup> H, <sup>13</sup> C and <sup>19</sup> F NMR spectra of compounds <b>2</b> ..... | S35 |
| Copies of <sup>1</sup> H and <sup>13</sup> C NMR spectra of compounds <b>3</b> and <b>4</b> .....     | S53 |
| Copies of HRMS spectra of unknown compounds <b>2</b> .....                                            | S55 |
| Copies of HRMS spectra of compounds <b>3</b> and <b>4</b> .....                                       | S59 |

## Details of calculation

All of the DFT calculations were performed with the Gaussian 09 program package.<sup>1</sup> The geometry optimization of all the minima and transition states involved were performed at the B3LYP levels of theory<sup>2</sup> with the 6-31+G(d,p) basis set for all atoms. The solution condition is given by IEFPCM model.<sup>3-5</sup> The vibrational frequencies were computed at the same level of theory to check whether every optimized geometrical structure is an energy minimum or a transition state and to get the correction of Gibbs free energy. IRC calculations<sup>6-7</sup> were used to confirm that the transition states found from the optimization calculations connect the related reactants and products. The high accurate zero-point energy is given under the level M06-2X/def2-TZVPP.<sup>8</sup> Solvent effects were computed by the uESE software<sup>9-12</sup> at the B3LYP/def2-TZVP level using the optimized structures. CM5 charges is given by Multiwfn program.<sup>13-15</sup>

## References

- 1 *J. Phys. Chem. A*, 2010, **114**, 13442–13444. Gaussian 09, Revision B.01: Frisch, M. J.; Trucks, G. W.; Schlegel, H. B.; Scuseria, G. E.; Robb, M. A.; Cheeseman, J. R.; Scalmani, G.; Barone, V.; Mennucci, B.; Petersson, G. A.; Nakatsuji, H.; Caricato, M.; Li, X.; Hratchian, H. P.; Izmaylov, A. F.; Bloino, J.; Zheng, G.; Sonnenberg, J. L.; Hada, M.; Ehara, M.; Toyota, K.; Fukuda, R.; Hasegawa, J.; Ishida, M.; Nakajima, T.; Honda, Y.; Kitao, O.; Nakai, H.; Vreven, T.; Montgomery, J. A., Jr.; Peralta, J. E.; Ogliaro, F.; Bearpark, M.; Heyd, J. J.; Brothers, E.; Kudin, K. N.; Staroverov, V. N.; Kobayashi, R.; Normand, J.; Raghavachari, K.; Rendell, A.; Burant, J. C.; Iyengar, S. S.; Tomasi, J.; Cossi, M.; Rega, N.; Millam, J. M.; Klene, M.; Knox, J. E.; Cross, J. B.; Bakken, V.; Adamo, C.; Jaramillo, J.; Gomperts, R.; Stratmann, R. E.; Yazyev, O.; Austin, A. J.; Cammi, R.; Pomelli, C.; Ochterski, J. W.; Martin, R. L.; Morokuma, K.; Zakrzewski, V. G.; Voth, G. A.; Salvador, P.; Dannenberg, J. J.; Dapprich, S.; Daniels, A. D.; Farkas, Ö.; Foresman, J. B.; Ortiz, J. V.; Cioslowski, J.; Fox, D. J. Gaussian, Inc., Wallingford, CT, 2009.
- 2 P. J. Stephens, F. J. Devlin, C. F. Chabalowski and M. J. Frisch, *J. Phys. Chem.*, 1994, **98**, 247–257.
- 3 S. Miertüs, E. Scrocco and J. Tomasi. *Chem. Phys.*, 1981, **55**, 117–29.
- 4 S. Miertüs and J. Tomasi. *Chem. Phys.*, 1982, **65**, 239–45.
- 5 J. L. Pascual-Ahuir, E. Silla and I. Tunón. *J. Comp. Chem.*, 1994, **15**, 1127–38.
- 6 K. Fukui, *J. Phys. Chem.*, 1970, **74**, 4161–4163.
- 7 K. Ishida, K. Morokuma and A. Komornicki, *J. Chem. Phys.*, 1977, **66**, 2153–2156.
- 8 Y. Zhao and D. G. Truhlar, *Theor. Chem. Acc.*, 2008, **120**, 215–241.
- 9 S. F. Vyboishchikov, uESE program, Girona, 2021.
- 10 S. F. Vyboishchikov and A. A. Voityuk, *J. Comput. Chem.*, 2021, **42**, 1184–1194.
- 11 A. A. Voityuk and S. F. Vyboishchikov, *Phys. Chem. Chem. Phys.*, 2020, **22**, 14591–14598.
- 12 A. A. Voityuk and S. F. Vyboishchikov, *Phys. Chem. Chem. Phys.*, 2019, **21**, 875–874.
- 13 T. Lu and F. Chen, *J. Comput. Chem.*, 2012, **33**, 580–592.
- 14 T. Lu and F. Chen, *Acta Phys. -Chim. Sin.*, 2012, **28**, 1–18.
- 15 A. V. Marenich, S. V. Jerome, C. J. Cramer and D. G. Truhlar, *J. Chem. Theory Comput.*, 2012, **8**, 527–541.

### Coordinates of All Stationary Points

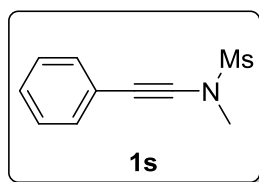

Standard orientation:

| Center Number | Atomic Number | Atomic Type | Coordinates (Angstroms) |           |           |
|---------------|---------------|-------------|-------------------------|-----------|-----------|
|               |               |             | X                       | Y         | Z         |
| 1             | 6             | 0           | 4.436230                | 0.953298  | 0.443436  |
| 2             | 6             | 0           | 3.062203                | 1.170318  | 0.339246  |
| 3             | 6             | 0           | 2.208256                | 0.134222  | -0.094709 |
| 4             | 6             | 0           | 2.766666                | -1.122045 | -0.413029 |
| 5             | 6             | 0           | 4.140413                | -1.332446 | -0.292621 |
| 6             | 6             | 0           | 4.981117                | -0.297384 | 0.131775  |
| 7             | 1             | 0           | 5.081905                | 1.761560  | 0.774055  |
| 8             | 1             | 0           | 2.640959                | 2.138904  | 0.589368  |
| 9             | 1             | 0           | 2.117855                | -1.923935 | -0.750751 |
| 10            | 1             | 0           | 4.555861                | -2.305762 | -0.536692 |
| 11            | 1             | 0           | 6.050531                | -0.463880 | 0.218759  |
| 12            | 6             | 0           | 0.801125                | 0.353730  | -0.212345 |
| 13            | 6             | 0           | -0.396983               | 0.532502  | -0.323731 |
| 14            | 7             | 0           | -1.719214               | 0.761449  | -0.476555 |
| 15            | 16            | 0           | -2.792884               | -0.499863 | 0.000186  |
| 16            | 8             | 0           | -4.123254               | -0.086371 | -0.467034 |
| 17            | 8             | 0           | -2.197054               | -1.750530 | -0.485565 |
| 18            | 6             | 0           | -2.201690               | 2.163212  | -0.442697 |
| 19            | 1             | 0           | -1.647762               | 2.719331  | -1.200352 |
| 20            | 1             | 0           | -3.260603               | 2.172056  | -0.695834 |
| 21            | 1             | 0           | -2.041510               | 2.617795  | 0.539871  |
| 22            | 6             | 0           | -2.776605               | -0.516644 | 1.800273  |
| 23            | 1             | 0           | -3.437433               | -1.328037 | 2.110435  |
| 24            | 1             | 0           | -1.754148               | -0.701339 | 2.131030  |
| 25            | 1             | 0           | -3.146958               | 0.443610  | 2.160200  |

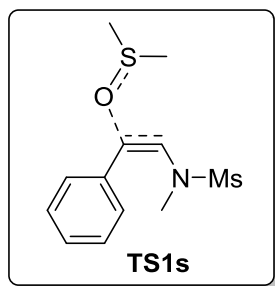

Standard orientation:

| Center Number | Atomic Number | Atomic Type | Coordinates (Angstroms) |           |           |
|---------------|---------------|-------------|-------------------------|-----------|-----------|
|               |               |             | X                       | Y         | Z         |
| 1             | 6             | 0           | 4.213403                | -1.019101 | 1.117204  |
| 2             | 6             | 0           | 2.967888                | -0.398572 | 1.217438  |
| 3             | 6             | 0           | 2.057433                | -0.425069 | 0.140364  |
| 4             | 6             | 0           | 2.447360                | -1.083524 | -1.042836 |
| 5             | 6             | 0           | 3.690252                | -1.716685 | -1.137334 |
| 6             | 6             | 0           | 4.579062                | -1.686355 | -0.058894 |
| 7             | 1             | 0           | 4.897740                | -0.990516 | 1.960665  |
| 8             | 1             | 0           | 2.687811                | 0.108185  | 2.135441  |
| 9             | 1             | 0           | 1.771179                | -1.090715 | -1.892649 |
| 10            | 1             | 0           | 3.966795                | -2.22742  | -2.058089 |
| 11            | 1             | 0           | 5.547224                | -2.172951 | -0.133330 |
| 12            | 6             | 0           | 0.719019                | 0.162716  | 0.235873  |
| 13            | 6             | 0           | -0.550448               | -0.031978 | 0.073864  |
| 14            | 7             | 0           | -1.239994               | -1.185621 | -0.241011 |
| 15            | 16            | 0           | -2.935365               | -1.037889 | -0.103210 |
| 16            | 8             | 0           | -3.350308               | 0.192871  | -0.802307 |
| 17            | 8             | 0           | -3.528022               | -2.320535 | -0.541105 |
| 18            | 6             | 0           | -0.665687               | -2.538310 | -0.076513 |
| 19            | 1             | 0           | 0.178406                | -2.634350 | -0.761802 |
| 20            | 1             | 0           | -0.309272               | -2.684493 | 0.949939  |
| 21            | 1             | 0           | -1.408728               | -3.295347 | -0.323177 |
| 22            | 8             | 0           | 1.131414                | 1.777899  | 0.701974  |
| 23            | 16            | 0           | 0.456558                | 3.070752  | 0.071550  |
| 24            | 6             | 0           | -1.303616               | 3.133415  | 0.549731  |
| 25            | 1             | 0           | -1.671654               | 4.095692  | 0.183444  |
| 26            | 1             | 0           | -1.849841               | 2.289637  | 0.134500  |
| 27            | 1             | 0           | -1.328806               | 3.121572  | 1.640408  |
| 28            | 6             | 0           | 0.309821                | 2.779860  | -1.717713 |
| 29            | 1             | 0           | -0.260150               | 1.871685  | -1.904540 |
| 30            | 1             | 0           | -0.186334               | 3.658826  | -2.135393 |
| 31            | 1             | 0           | 1.324404                | 2.702852  | -2.110342 |

|    |   |   |           |           |          |
|----|---|---|-----------|-----------|----------|
| 32 | 6 | 0 | -3.290481 | -0.818566 | 1.651352 |
| 33 | 1 | 0 | -4.369726 | -0.687883 | 1.745586 |
| 34 | 1 | 0 | -2.960172 | -1.711782 | 2.183356 |
| 35 | 1 | 0 | -2.756697 | 0.067006  | 1.995910 |

---

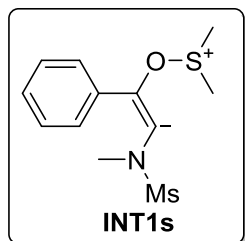

Standard orientation:

| Center Number | Atomic Number | Atomic Type | Coordinates (Angstroms) |           |           |
|---------------|---------------|-------------|-------------------------|-----------|-----------|
|               |               |             | X                       | Y         | Z         |
| 1             | 6             | 0           | 4.296978                | -0.514497 | 0.835900  |
| 2             | 6             | 0           | 3.069810                | 0.146663  | 0.767629  |
| 3             | 6             | 0           | 2.064040                | -0.279371 | -0.123846 |
| 4             | 6             | 0           | 2.346688                | -1.373828 | -0.964060 |
| 5             | 6             | 0           | 3.572612                | -2.041728 | -0.890823 |
| 6             | 6             | 0           | 4.553408                | -1.616136 | 0.009996  |
| 7             | 1             | 0           | 5.053693                | -0.173415 | 1.537211  |
| 8             | 1             | 0           | 2.880325                | 0.998711  | 1.413407  |
| 9             | 1             | 0           | 1.599486                | -1.694808 | -1.684009 |
| 10            | 1             | 0           | 3.764422                | -2.886220 | -1.547062 |
| 11            | 1             | 0           | 5.508221                | -2.131025 | 0.064432  |
| 12            | 6             | 0           | 0.746796                | 0.390747  | -0.200655 |
| 13            | 6             | 0           | -0.542857               | 0.077726  | -0.241107 |
| 14            | 7             | 0           | -1.017530               | -1.224103 | -0.020866 |
| 15            | 16            | 0           | -2.714033               | -1.342159 | -0.101721 |
| 16            | 8             | 0           | -3.169997               | -0.708240 | -1.353946 |
| 17            | 8             | 0           | -3.069535               | -2.763937 | 0.113685  |
| 18            | 6             | 0           | -0.337089               | -2.212756 | 0.844818  |
| 19            | 1             | 0           | 0.527824                | -2.620428 | 0.320164  |
| 20            | 1             | 0           | 0.004214                | -1.728433 | 1.767356  |
| 21            | 1             | 0           | -1.014419               | -3.030694 | 1.085091  |
| 22            | 8             | 0           | 1.126905                | 1.861412  | -0.453702 |
| 23            | 16            | 0           | 0.185236                | 3.132122  | -0.154919 |
| 24            | 6             | 0           | -0.552248               | 2.903857  | 1.489730  |
| 25            | 1             | 0           | -1.146178               | 3.802117  | 1.675453  |

|    |   |   |           |           |           |
|----|---|---|-----------|-----------|-----------|
| 26 | 1 | 0 | -1.154847 | 2.000498  | 1.514037  |
| 27 | 1 | 0 | 0.275973  | 2.853680  | 2.197857  |
| 28 | 6 | 0 | -1.263936 | 3.057006  | -1.251708 |
| 29 | 1 | 0 | -1.846381 | 2.163811  | -1.039921 |
| 30 | 1 | 0 | -1.811525 | 3.988069  | -1.080035 |
| 31 | 1 | 0 | -0.873171 | 3.043047  | -2.270646 |
| 32 | 6 | 0 | -3.400171 | -0.390659 | 1.271000  |
| 33 | 1 | 0 | -4.485134 | -0.493550 | 1.215549  |
| 34 | 1 | 0 | -3.019528 | -0.807573 | 2.204408  |
| 35 | 1 | 0 | -3.102677 | 0.649495  | 1.149464  |

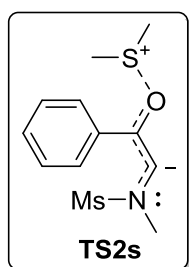

Standard orientation:

| Center Number | Atomic Number | Atomic Type | Coordinates (Angstroms) |           |           |
|---------------|---------------|-------------|-------------------------|-----------|-----------|
|               |               |             | X                       | Y         | Z         |
| 1             | 6             | 0           | 4.053976                | -1.039213 | 0.697247  |
| 2             | 6             | 0           | 2.964401                | -0.185924 | 0.513638  |
| 3             | 6             | 0           | 1.848709                | -0.577735 | -0.252447 |
| 4             | 6             | 0           | 1.891076                | -1.847260 | -0.862039 |
| 5             | 6             | 0           | 2.979536                | -2.704658 | -0.678621 |
| 6             | 6             | 0           | 4.066428                | -2.308080 | 0.106199  |
| 7             | 1             | 0           | 4.894782                | -0.712582 | 1.303282  |
| 8             | 1             | 0           | 2.984295                | 0.794216  | 0.979371  |
| 9             | 1             | 0           | 1.067458                | -2.156529 | -1.498736 |
| 10            | 1             | 0           | 2.982830                | -3.677574 | -1.162643 |
| 11            | 1             | 0           | 4.914882                | -2.971326 | 0.246854  |
| 12            | 6             | 0           | 0.682869                | 0.321100  | -0.494891 |
| 13            | 6             | 0           | -0.677718               | 0.164114  | -0.456531 |
| 14            | 7             | 0           | -1.268383               | -0.979429 | 0.047531  |
| 15            | 16            | 0           | -2.980105               | -0.958852 | -0.067850 |
| 16            | 8             | 0           | -3.368723               | -0.627268 | -1.451287 |
| 17            | 8             | 0           | -3.473434               | -2.236829 | 0.492553  |
| 18            | 6             | 0           | -0.687700               | -1.975987 | 0.979712  |
| 19            | 1             | 0           | -0.210023               | -2.793855 | 0.435979  |

|    |    |   |           |           |           |
|----|----|---|-----------|-----------|-----------|
| 20 | 1  | 0 | 0.058533  | -1.472455 | 1.597490  |
| 21 | 1  | 0 | -1.467420 | -2.390462 | 1.617052  |
| 22 | 8  | 0 | 1.142699  | 1.550459  | -1.040421 |
| 23 | 16 | 0 | 1.030123  | 3.070801  | -0.148292 |
| 24 | 6  | 0 | 0.724375  | 2.594839  | 1.561269  |
| 25 | 1  | 0 | 0.041906  | 3.318606  | 2.008571  |
| 26 | 1  | 0 | 0.261282  | 1.598738  | 1.536174  |
| 27 | 1  | 0 | 1.676256  | 2.582404  | 2.090240  |
| 28 | 6  | 0 | -0.621847 | 3.595373  | -0.668475 |
| 29 | 1  | 0 | -1.304655 | 2.760443  | -0.495807 |
| 30 | 1  | 0 | -0.888340 | 4.488738  | -0.099405 |
| 31 | 1  | 0 | -0.554433 | 3.831706  | -1.731155 |
| 32 | 6  | 0 | -3.533619 | 0.380277  | 1.003756  |
| 33 | 1  | 0 | -4.618773 | 0.435523  | 0.903762  |
| 34 | 1  | 0 | -3.248393 | 0.136919  | 2.027865  |
| 35 | 1  | 0 | -3.059061 | 1.300339  | 0.666993  |

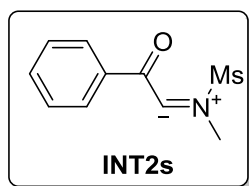

Standard orientation:

| Center Number | Atomic Number | Atomic Type | Coordinates (Angstroms) |           |           |
|---------------|---------------|-------------|-------------------------|-----------|-----------|
|               |               |             | X                       | Y         | Z         |
| 1             | 6             | 0           | 4.494150                | -0.219993 | 0.126351  |
| 2             | 6             | 0           | 3.335408                | -0.956737 | -0.113750 |
| 3             | 6             | 0           | 2.097278                | -0.304158 | -0.235046 |
| 4             | 6             | 0           | 2.034860                | 1.094367  | -0.114070 |
| 5             | 6             | 0           | 3.196341                | 1.829518  | 0.127221  |
| 6             | 6             | 0           | 4.426317                | 1.173643  | 0.246999  |
| 7             | 1             | 0           | 5.448988                | -0.728219 | 0.220257  |
| 8             | 1             | 0           | 3.372157                | -2.037115 | -0.205580 |
| 9             | 1             | 0           | 1.085920                | 1.611422  | -0.222388 |
| 10            | 1             | 0           | 3.143580                | 2.910170  | 0.215494  |
| 11            | 1             | 0           | 5.330129                | 1.746665  | 0.431506  |
| 12            | 6             | 0           | 0.872489                | -1.121807 | -0.455899 |
| 13            | 6             | 0           | -0.415236               | -0.455480 | -0.586420 |
| 14            | 7             | 0           | -1.279894               | -0.414257 | 0.359226  |
| 15            | 16            | 0           | -2.929350               | 0.264607  | -0.088425 |

|    |   |   |           |           |           |
|----|---|---|-----------|-----------|-----------|
| 16 | 8 | 0 | -3.480108 | -0.612578 | -1.128491 |
| 17 | 8 | 0 | -3.648029 | 0.437529  | 1.181727  |
| 18 | 6 | 0 | -1.195908 | -0.903155 | 1.762521  |
| 19 | 1 | 0 | -0.213469 | -1.353791 | 1.893050  |
| 20 | 1 | 0 | -1.326647 | -0.066778 | 2.449096  |
| 21 | 1 | 0 | -1.972301 | -1.648632 | 1.939476  |
| 22 | 6 | 0 | -2.504506 | 1.858962  | -0.797606 |
| 23 | 1 | 0 | -1.834421 | 1.692178  | -1.639612 |
| 24 | 1 | 0 | -3.451952 | 2.292047  | -1.124012 |
| 25 | 1 | 0 | -2.040766 | 2.466649  | -0.020916 |
| 26 | 8 | 0 | 0.908198  | -2.348635 | -0.652980 |

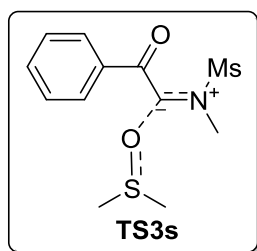

Standard orientation:

| Center Number | Atomic Number | Atomic Type | Coordinates (Angstroms) |           |           |
|---------------|---------------|-------------|-------------------------|-----------|-----------|
|               |               |             | X                       | Y         | Z         |
| 1             | 6             | 0           | 4.453793                | -1.739586 | 0.310809  |
| 2             | 6             | 0           | 3.070701                | -1.874672 | 0.439686  |
| 3             | 6             | 0           | 2.204891                | -0.920638 | -0.121589 |
| 4             | 6             | 0           | 2.751532                | 0.163936  | -0.829169 |
| 5             | 6             | 0           | 4.136175                | 0.293010  | -0.962786 |
| 6             | 6             | 0           | 4.991111                | -0.655021 | -0.391375 |
| 7             | 1             | 0           | 5.111713                | -2.479547 | 0.757319  |
| 8             | 1             | 0           | 2.645781                | -2.714825 | 0.978503  |
| 9             | 1             | 0           | 2.098199                | 0.893804  | -1.294969 |
| 10            | 1             | 0           | 4.545948                | 1.129668  | -1.521015 |
| 11            | 1             | 0           | 6.067193                | -0.552422 | -0.496752 |
| 12            | 6             | 0           | 0.719641                | -1.124540 | 0.081476  |
| 13            | 6             | 0           | -0.062715               | 0.055634  | -0.100600 |
| 14            | 7             | 0           | -0.054241               | 1.135991  | 0.627077  |
| 15            | 16            | 0           | -0.671377               | 2.640790  | -0.129253 |
| 16            | 8             | 0           | -0.040986               | 3.759020  | 0.595861  |
| 17            | 8             | 0           | -0.465455               | 2.506036  | -1.576553 |
| 18            | 6             | 0           | 0.181812                | 1.222910  | 2.091888  |
| 19            | 1             | 0           | 0.836174                | 0.395213  | 2.365089  |



|    |    |   |           |           |           |
|----|----|---|-----------|-----------|-----------|
| 20 | 1  | 0 | 0.662786  | 2.169198  | 2.334956  |
| 21 | 1  | 0 | -0.763549 | 1.133408  | 2.633714  |
| 22 | 6  | 0 | -2.431834 | 2.600984  | 0.229391  |
| 23 | 1  | 0 | -2.564972 | 2.695484  | 1.307421  |
| 24 | 1  | 0 | -2.873850 | 3.451368  | -0.292991 |
| 25 | 1  | 0 | -2.816484 | 1.648332  | -0.134820 |
| 26 | 8  | 0 | 0.277670  | -2.276191 | 0.281622  |
| 27 | 16 | 0 | -2.483195 | -1.880869 | -0.521979 |
| 28 | 8  | 0 | -2.033815 | -0.633015 | 0.301965  |
| 29 | 6  | 0 | -4.212944 | -1.512395 | -0.959109 |
| 30 | 1  | 0 | -4.194585 | -0.681901 | -1.666558 |
| 31 | 1  | 0 | -4.649009 | -2.394614 | -1.434363 |
| 32 | 1  | 0 | -4.767123 | -1.238610 | -0.058750 |
| 33 | 6  | 0 | -2.784877 | -3.192416 | 0.702606  |
| 34 | 1  | 0 | -3.228888 | -4.050320 | 0.191620  |
| 35 | 1  | 0 | -1.809092 | -3.452847 | 1.110643  |
| 36 | 1  | 0 | -3.450427 | -2.812092 | 1.480583  |

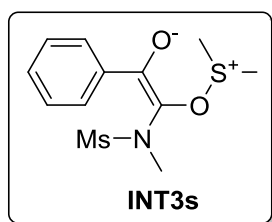

Standard orientation:

| Center Number | Atomic Number | Atomic Type | Coordinates (Angstroms) |           |           |
|---------------|---------------|-------------|-------------------------|-----------|-----------|
|               |               |             | X                       | Y         | Z         |
| 1             | 6             | 0           | 4.324402                | -1.579619 | 0.405139  |
| 2             | 6             | 0           | 2.949951                | -1.796245 | 0.523281  |
| 3             | 6             | 0           | 2.027818                | -0.914317 | -0.067149 |
| 4             | 6             | 0           | 2.517706                | 0.174937  | -0.805480 |
| 5             | 6             | 0           | 3.894520                | 0.385330  | -0.934720 |
| 6             | 6             | 0           | 4.802912                | -0.485837 | -0.325614 |
| 7             | 1             | 0           | 5.021553                | -2.265087 | 0.879263  |
| 8             | 1             | 0           | 2.579348                | -2.652923 | 1.077804  |
| 9             | 1             | 0           | 1.821555                | 0.846097  | -1.295948 |
| 10            | 1             | 0           | 4.256177                | 1.228078  | -1.517577 |
| 11            | 1             | 0           | 5.871785                | -0.319144 | -0.424575 |
| 12            | 6             | 0           | 0.563212                | -1.225318 | 0.070974  |
| 13            | 6             | 0           | -0.347298               | -0.245160 | 0.411686  |

|    |    |   |           |           |           |
|----|----|---|-----------|-----------|-----------|
| 14 | 7  | 0 | -0.132716 | 1.060595  | 0.816275  |
| 15 | 16 | 0 | -0.528412 | 2.362821  | -0.230421 |
| 16 | 8  | 0 | 0.362318  | 3.494151  | 0.106069  |
| 17 | 8  | 0 | -0.512547 | 1.831683  | -1.605341 |
| 18 | 6  | 0 | -0.127108 | 1.393383  | 2.260224  |
| 19 | 1  | 0 | 0.564486  | 0.707492  | 2.752491  |
| 20 | 1  | 0 | 0.233898  | 2.413314  | 2.402069  |
| 21 | 1  | 0 | -1.120487 | 1.288988  | 2.710836  |
| 22 | 6  | 0 | -2.212122 | 2.877625  | 0.165072  |
| 23 | 1  | 0 | -2.242501 | 3.214667  | 1.201654  |
| 24 | 1  | 0 | -2.456353 | 3.699513  | -0.510258 |
| 25 | 1  | 0 | -2.880001 | 2.031680  | 0.008743  |
| 26 | 8  | 0 | 0.175668  | -2.440134 | -0.124818 |
| 27 | 16 | 0 | -2.340573 | -1.679827 | -0.569278 |
| 28 | 8  | 0 | -1.723311 | -0.694125 | 0.613147  |
| 29 | 6  | 0 | -3.998357 | -0.948553 | -0.664523 |
| 30 | 1  | 0 | -3.909700 | -0.008031 | -1.208310 |
| 31 | 1  | 0 | -4.629570 | -1.639796 | -1.228196 |
| 32 | 1  | 0 | -4.393738 | -0.791419 | 0.340460  |
| 33 | 6  | 0 | -2.720258 | -3.180552 | 0.363300  |
| 34 | 1  | 0 | -3.310436 | -3.825149 | -0.292478 |
| 35 | 1  | 0 | -1.759608 | -3.632735 | 0.600519  |
| 36 | 1  | 0 | -3.282941 | -2.914272 | 1.259163  |

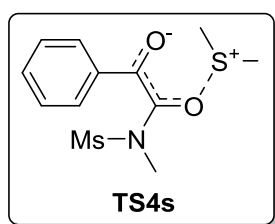

Standard orientation:

| Center Number | Atomic Number | Atomic Type | Coordinates (Angstroms) |           |           |
|---------------|---------------|-------------|-------------------------|-----------|-----------|
|               |               |             | X                       | Y         | Z         |
| 1             | 6             | 0           | 4.328189                | -1.532395 | 0.487240  |
| 2             | 6             | 0           | 2.955033                | -1.752718 | 0.613975  |
| 3             | 6             | 0           | 2.029156                | -0.923673 | -0.043167 |
| 4             | 6             | 0           | 2.512177                | 0.115504  | -0.852641 |
| 5             | 6             | 0           | 3.888060                | 0.328741  | -0.990609 |
| 6             | 6             | 0           | 4.800477                | -0.488892 | -0.317511 |

|    |    |   |           |           |           |
|----|----|---|-----------|-----------|-----------|
| 7  | 1  | 0 | 5.028820  | -2.175260 | 1.012963  |
| 8  | 1  | 0 | 2.591590  | -2.570786 | 1.229198  |
| 9  | 1  | 0 | 1.813203  | 0.746456  | -1.390183 |
| 10 | 1  | 0 | 4.245107  | 1.133026  | -1.628020 |
| 11 | 1  | 0 | 5.868287  | -0.319036 | -0.422012 |
| 12 | 6  | 0 | 0.565398  | -1.250218 | 0.092216  |
| 13 | 6  | 0 | -0.351820 | -0.319314 | 0.575525  |
| 14 | 7  | 0 | -0.123858 | 1.025766  | 0.873640  |
| 15 | 16 | 0 | -0.463433 | 2.246825  | -0.276302 |
| 16 | 8  | 0 | 0.538431  | 3.324069  | -0.122707 |
| 17 | 8  | 0 | -0.582941 | 1.573551  | -1.583845 |
| 18 | 6  | 0 | -0.138631 | 1.468516  | 2.284623  |
| 19 | 1  | 0 | 0.553652  | 0.833166  | 2.840017  |
| 20 | 1  | 0 | 0.212455  | 2.500343  | 2.352618  |
| 21 | 1  | 0 | -1.136331 | 1.390729  | 2.731271  |
| 22 | 6  | 0 | -2.061770 | 2.969456  | 0.151417  |
| 23 | 1  | 0 | -1.984935 | 3.435196  | 1.133964  |
| 24 | 1  | 0 | -2.275055 | 3.721948  | -0.609909 |
| 25 | 1  | 0 | -2.819250 | 2.187279  | 0.148188  |
| 26 | 8  | 0 | 0.181659  | -2.431416 | -0.219844 |
| 27 | 16 | 0 | -2.470789 | -1.509860 | -0.600631 |
| 28 | 8  | 0 | -1.664410 | -0.787077 | 0.767573  |
| 29 | 6  | 0 | -4.083686 | -0.707980 | -0.409535 |
| 30 | 1  | 0 | -4.009141 | 0.291326  | -0.837834 |
| 31 | 1  | 0 | -4.818075 | -1.293204 | -0.968300 |
| 32 | 1  | 0 | -4.345541 | -0.666606 | 0.649405  |
| 33 | 6  | 0 | -2.820027 | -3.129718 | 0.114127  |
| 34 | 1  | 0 | -3.459059 | -3.671258 | -0.587094 |
| 35 | 1  | 0 | -1.850741 | -3.614058 | 0.221525  |
| 36 | 1  | 0 | -3.317677 | -2.997932 | 1.076260  |

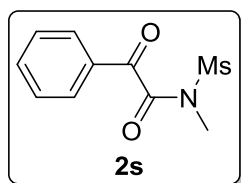

Standard orientation:

| Center Number | Atomic Number | Atomic Type | Coordinates (Angstroms) |   |   |
|---------------|---------------|-------------|-------------------------|---|---|
|               |               |             | X                       | Y | Z |

|    |    |   |           |           |           |
|----|----|---|-----------|-----------|-----------|
| 1  | 6  | 0 | -3.390299 | -1.785257 | 0.231928  |
| 2  | 6  | 0 | -2.191602 | -1.103128 | 0.023786  |
| 3  | 6  | 0 | -2.196283 | 0.294776  | -0.133719 |
| 4  | 6  | 0 | -3.413592 | 1.000216  | -0.080073 |
| 5  | 6  | 0 | -4.607045 | 0.314275  | 0.122936  |
| 6  | 6  | 0 | -4.596254 | -1.078776 | 0.279459  |
| 7  | 1  | 0 | -3.384071 | -2.863527 | 0.353913  |
| 8  | 1  | 0 | -1.260621 | -1.659054 | -0.018442 |
| 9  | 1  | 0 | -3.405299 | 2.078390  | -0.199260 |
| 10 | 1  | 0 | -5.545493 | 0.858322  | 0.160705  |
| 11 | 1  | 0 | -5.528787 | -1.611696 | 0.438849  |
| 12 | 6  | 0 | -0.942681 | 1.050566  | -0.324649 |
| 13 | 6  | 0 | 0.365923  | 0.264136  | -0.556729 |
| 14 | 7  | 0 | 1.316806  | 0.313501  | 0.430523  |
| 15 | 16 | 0 | 2.872832  | -0.445296 | 0.140805  |
| 16 | 8  | 0 | 3.671105  | -0.117682 | 1.329484  |
| 17 | 8  | 0 | 2.647880  | -1.853531 | -0.199916 |
| 18 | 6  | 0 | 1.116191  | 1.041308  | 1.703215  |
| 19 | 1  | 0 | 0.082095  | 0.914046  | 2.024210  |
| 20 | 1  | 0 | 1.765281  | 0.608088  | 2.460440  |
| 21 | 1  | 0 | 1.344107  | 2.102366  | 1.583832  |
| 22 | 8  | 0 | 0.518052  | -0.283226 | -1.645584 |
| 23 | 8  | 0 | -0.873283 | 2.271816  | -0.409496 |
| 24 | 6  | 0 | 3.530850  | 0.435318  | -1.277555 |
| 25 | 1  | 0 | 4.508412  | -0.009683 | -1.473713 |
| 26 | 1  | 0 | 2.853204  | 0.286177  | -2.116666 |
| 27 | 1  | 0 | 3.626926  | 1.487177  | -1.007898 |

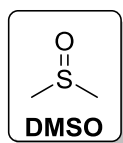

Standard orientation:

| Center Number | Atomic Number | Atomic Type | Coordinates (Angstroms) |           |           |
|---------------|---------------|-------------|-------------------------|-----------|-----------|
|               |               |             | X                       | Y         | Z         |
| 1             | 16            | 0           | 0.264667                | 0.420016  | -0.000000 |
| 2             | 6             | 0           | 0.264667                | -0.781162 | 1.375441  |
| 3             | 6             | 0           | 0.264667                | -0.781162 | -1.375441 |
| 4             | 1             | 0           | 0.199131                | -0.205396 | -2.300170 |

|    |   |   |           |           |           |
|----|---|---|-----------|-----------|-----------|
| 5  | 1 | 0 | 1.199669  | -1.346326 | -1.355315 |
| 6  | 1 | 0 | -0.598156 | -1.444154 | -1.275795 |
| 7  | 8 | 0 | -1.126495 | 1.080680  | -0.000000 |
| 8  | 1 | 0 | -0.598156 | -1.444154 | 1.275795  |
| 9  | 1 | 0 | 1.199669  | -1.346326 | 1.355315  |
| 10 | 1 | 0 | 0.199131  | -0.205396 | 2.300170  |

---

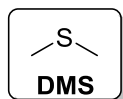

Standard orientation:

---

| Center<br>Number | Atomic<br>Number | Atomic<br>Type | Coordinates (Angstroms) |           |           |
|------------------|------------------|----------------|-------------------------|-----------|-----------|
|                  |                  |                | X                       | Y         | Z         |
| 1                | 16               | 0              | 0.000000                | 0.660380  | 0.000000  |
| 2                | 6                | 0              | -1.401265               | -0.513306 | 0.000000  |
| 3                | 1                | 0              | -2.318575               | 0.079759  | -0.000035 |
| 4                | 1                | 0              | -1.382301               | -1.141504 | -0.894489 |
| 5                | 1                | 0              | -1.382342               | -1.141458 | 0.894523  |
| 6                | 6                | 0              | 1.401265                | -0.513306 | 0.000000  |
| 7                | 1                | 0              | 1.382334                | -1.141466 | -0.894516 |
| 8                | 1                | 0              | 2.318575                | 0.079759  | 0.000023  |
| 9                | 1                | 0              | 1.382308                | -1.141496 | 0.894495  |

---

## Computed Energies

**Table S1.** Electronic energies ( $E_{gas}$  in Hartree), thermal correction to Gibbs free energy ( $\Delta G_{correction}$  in Hartree), Gibbs free energy in gas phase ( $G_{gas}$  in Hartree,  $G_{gas} = E_{gas} + \Delta G_{correction}$ ), solvation free energy ( $G_{uESE}$  in kcal/mol), Gibbs free energy about molecule converts from the gas-phase standard state to the solution-phase standard state of 1 M ( $RT\ln(RT/p)$  in kcal/mol, which is 1.89 kcal/mol), free energies in solution ( $\Delta G_{solv}$  in Hartree,  $\Delta G_{solv} = G_{gas} + G_{uESE} + RT\ln(RT/p)$ ), relative energies ( $\Delta G$ ) at 298 K are reported in kcal/mol.

| Structure    | $E_{gas}$    | $\Delta G_{correction}$ | $G_{gas}$    | $G_{uESE}$ | $RT\ln(RT/p)$ | $\Delta G_{solv}$ | $\Delta G$ |
|--------------|--------------|-------------------------|--------------|------------|---------------|-------------------|------------|
| <b>DMSO</b>  | -553.1889943 | 0.050841                | -553.1381533 | -7.155     | 1.89          | -553.1465436      | 0.0        |
| <b>DMS</b>   | -477.9910865 | 0.048669                | -477.9424175 | -1.076     | 1.89          | -477.9411204      | 0.0        |
| <b>1s</b>    | -990.9633956 | 0.148345                | -990.8150506 | -15.05     | 1.89          | -990.8360224      | 0.0        |
| <b>2s</b>    | -1141.488823 | 0.157523                | -1141.3313   | -17.948    | 1.89          | -1141.356891      | -69.0      |
| <b>INT1s</b> | -1544.101011 | 0.2229                  | -1543.878111 | -31.325    | 1.89          | -1543.925019      | 36.1       |
| <b>INT2s</b> | -1066.176314 | 0.151818                | -1066.024496 | -18.075    | 1.89          | -1066.050288      | -5.5       |
| <b>INT3s</b> | -1619.390395 | 0.226765                | -1619.16363  | -32.269    | 1.89          | -1619.212042      | -15.1      |
| <b>TS1s</b>  | -1544.104411 | 0.219693                | -1543.884718 | -26.136    | 1.89          | -1543.923356      | 37.2       |
| <b>TS2s</b>  | -1544.086074 | 0.221604                | -1543.86447  | -30.75     | 1.89          | -1543.910462      | 45.2       |
| <b>TS3s</b>  | -1619.375775 | 0.224113                | -1619.151662 | -25.373    | 1.89          | -1619.189085      | -0.7       |
| <b>TS4s</b>  | -1619.385144 | 0.226873                | -1619.158271 | -31.04     | 1.89          | -1619.204724      | -10.5      |

Copies of  $^1\text{H}$ ,  $^{13}\text{C}$  and  $^{19}\text{F}$  NMR spectra of compounds **1**  
*N*,4-Dimethyl-*N*-(phenylethynyl)benzenesulfonamide (**1a**)

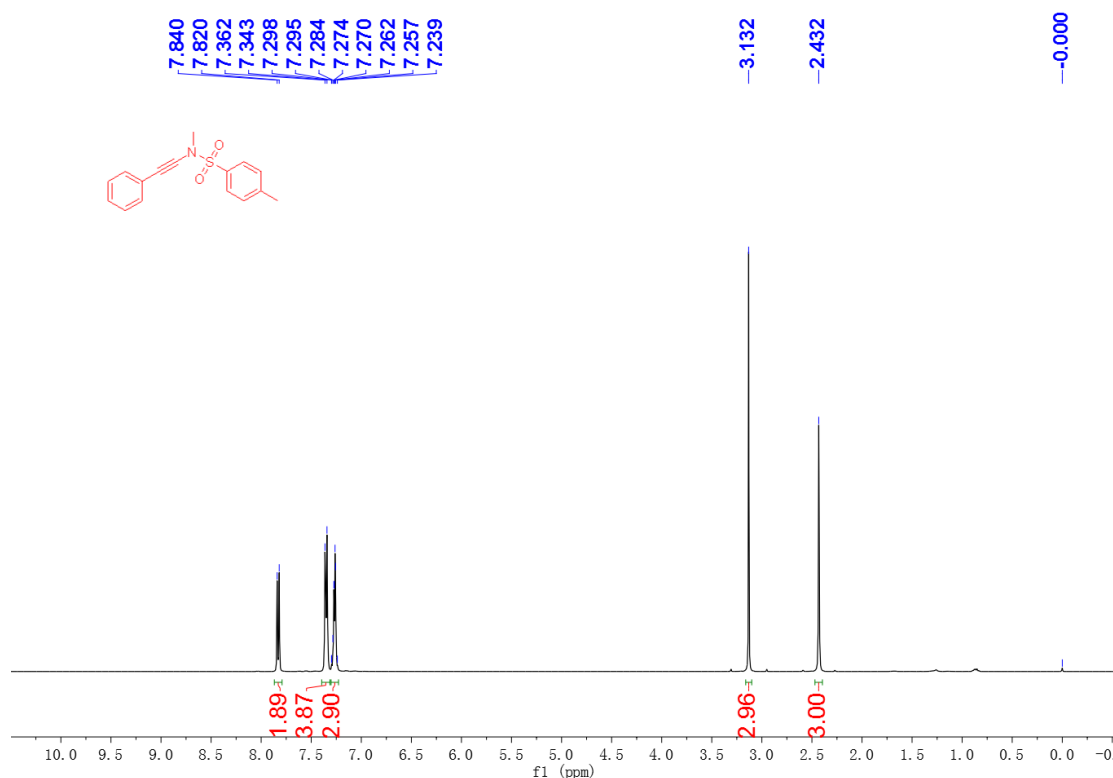

Figure S1.  $^1\text{H}$  NMR spectrum (400 MHz,  $\text{CDCl}_3$ ) of *N*,4-dimethyl-*N*-(phenylethynyl)benzenesulfonamide (**1a**)

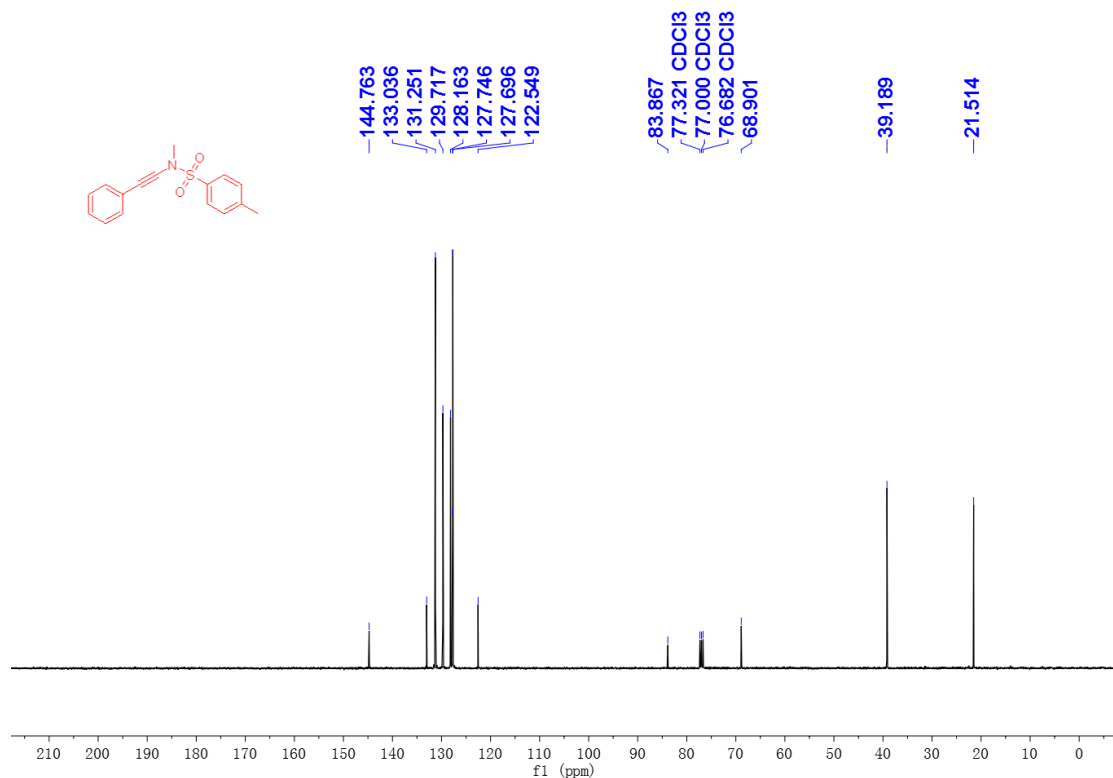

Figure S2.  $^{13}\text{C}$  NMR spectrum (101 MHz,  $\text{CDCl}_3$ ) of *N*,4-dimethyl-*N*-(phenylethynyl)benzenesulfonamide (**1a**)

*N*-Methyl-*N*-(phenylethynyl)benzenesulfonamide (**1b**)

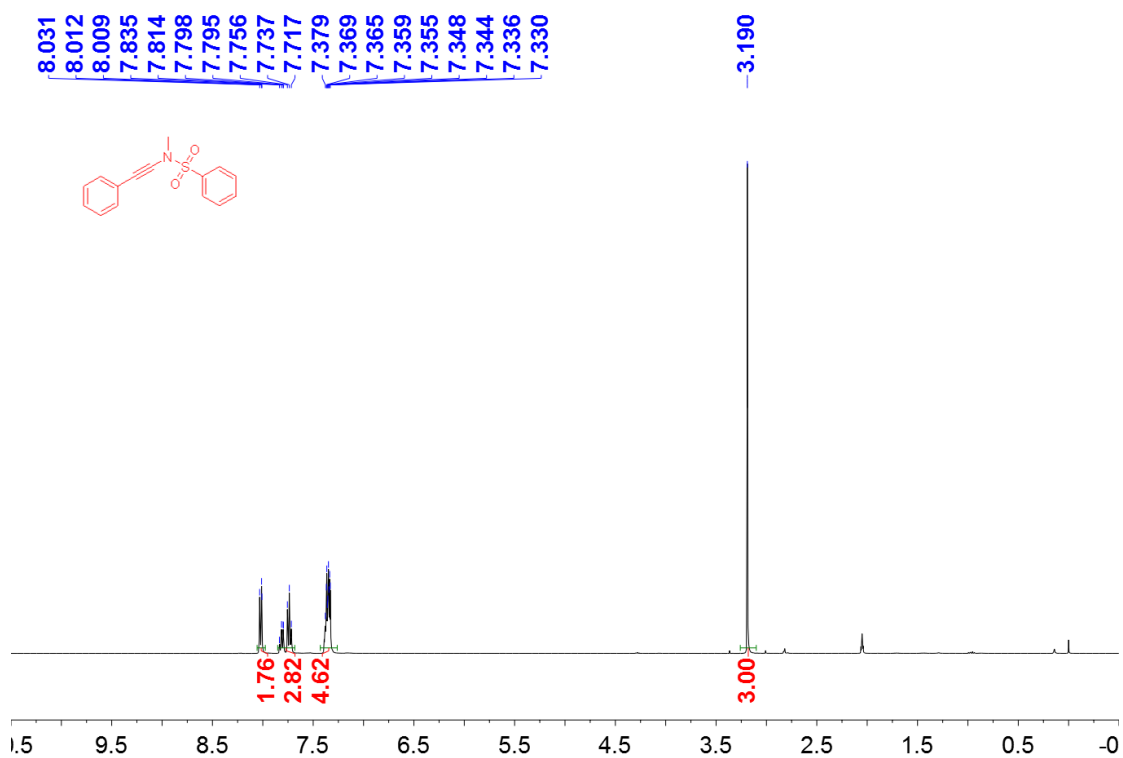

Figure S3. <sup>1</sup>H NMR spectrum (400 MHz, CD<sub>3</sub>COCD<sub>3</sub>) of *N*-methyl-*N*-(phenylethynyl)benzenesulfonamide (**1b**)

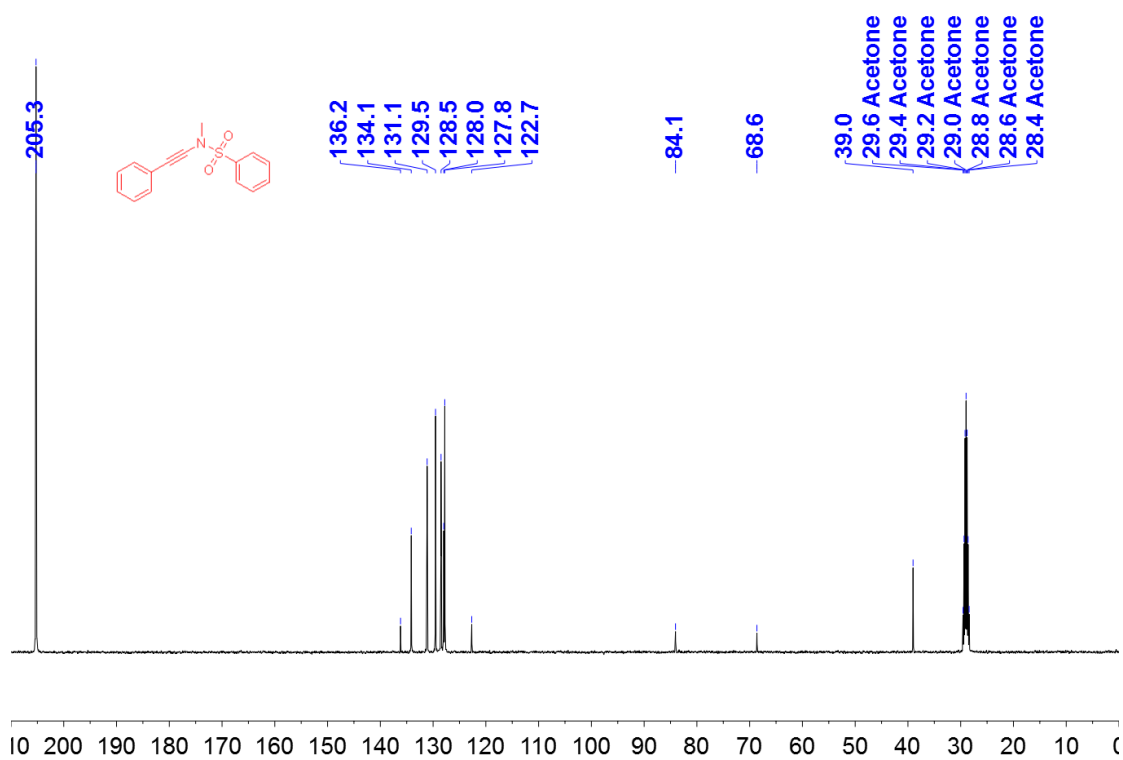

Figure S4. <sup>13</sup>C NMR spectrum (101 MHz, CD<sub>3</sub>COCD<sub>3</sub>) of *N*-methyl-*N*-(phenylethynyl)benzenesulfonamide (**1b**)



4-Bromo-*N*-methyl-*N*-(phenylethynyl)benzenesulfonamide (**1c**)

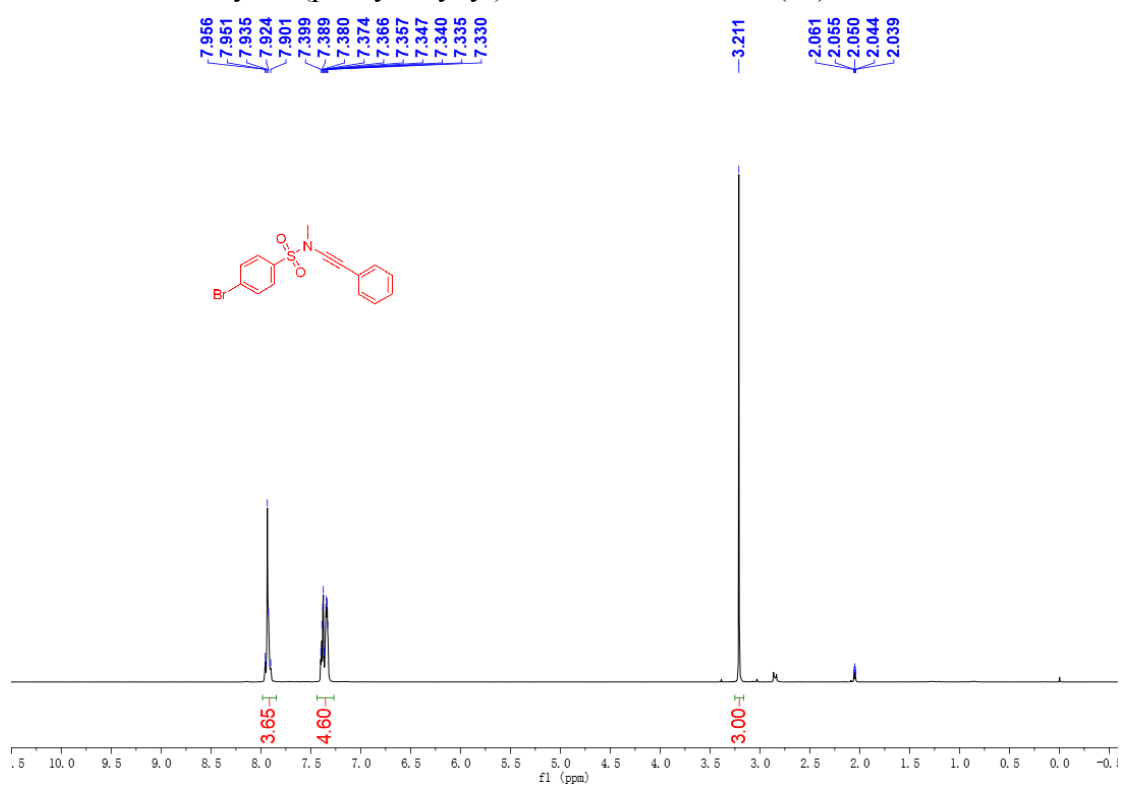

Figure S5. <sup>1</sup>H NMR spectrum (400 MHz, CD<sub>3</sub>COCD<sub>3</sub>) of 4-bromo-*N*-methyl-*N*-(phenylethynyl)benzenesulfonamide (**1c**)

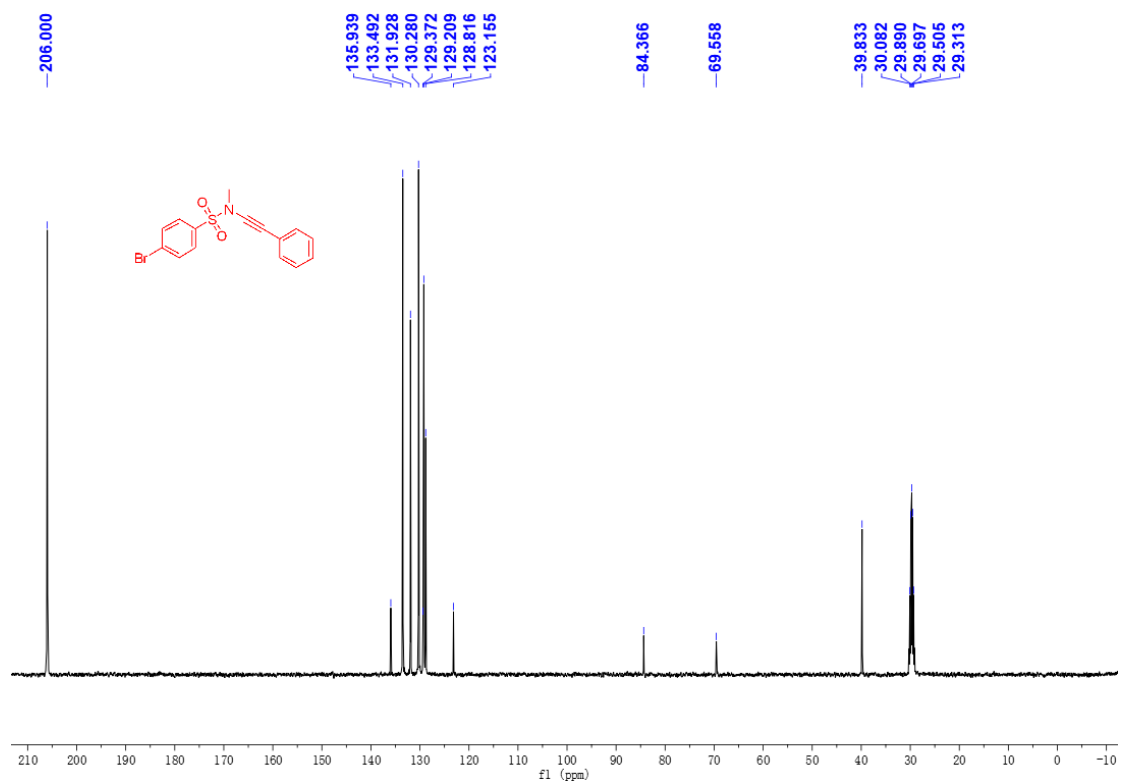

Figure S6. <sup>13</sup>C NMR spectrum (101 MHz, CD<sub>3</sub>COCD<sub>3</sub>) of 4-bromo-*N*-methyl-*N*-(phenylethynyl)benzenesulfonamide (**1c**)

*N*-Methyl-4-nitro-*N*-(phenylethynyl)benzenesulfonamide (**1d**)

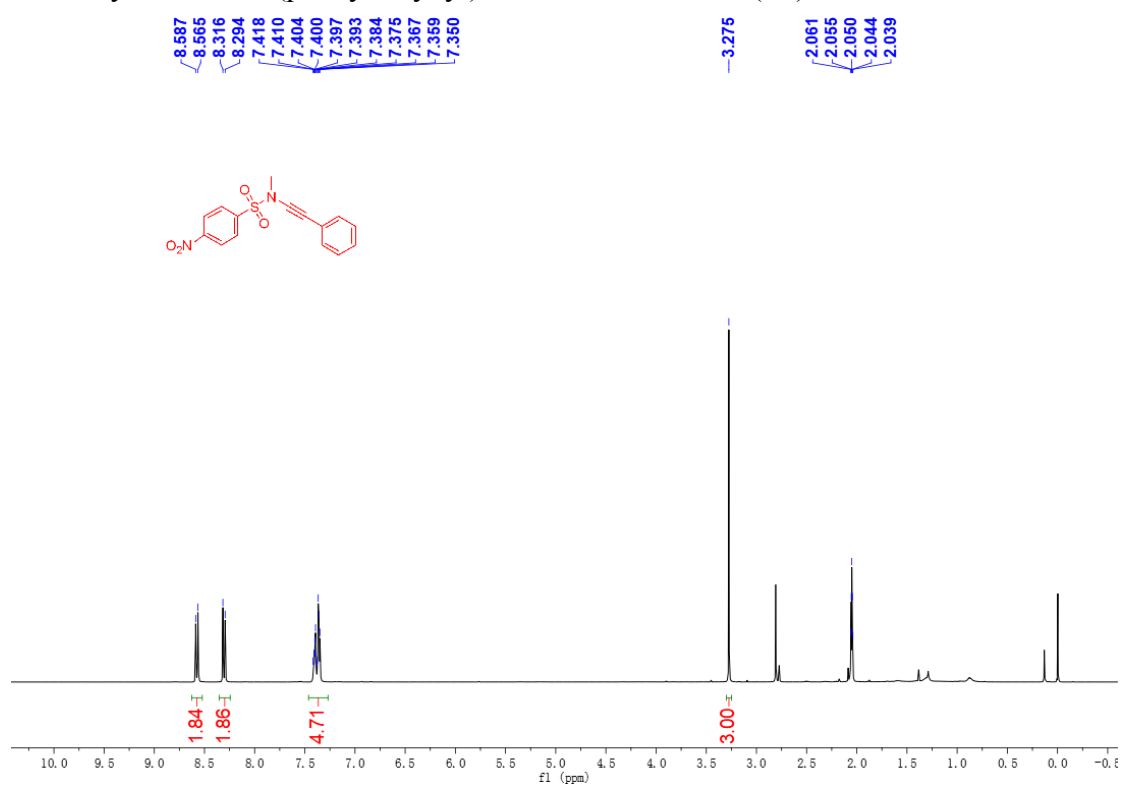

Figure S7. <sup>1</sup>H NMR spectrum (400 MHz, CD<sub>3</sub>COCD<sub>3</sub>) of *N*-methyl-4-nitro-*N*-(phenylethynyl)benzenesulfonamide (**1d**)

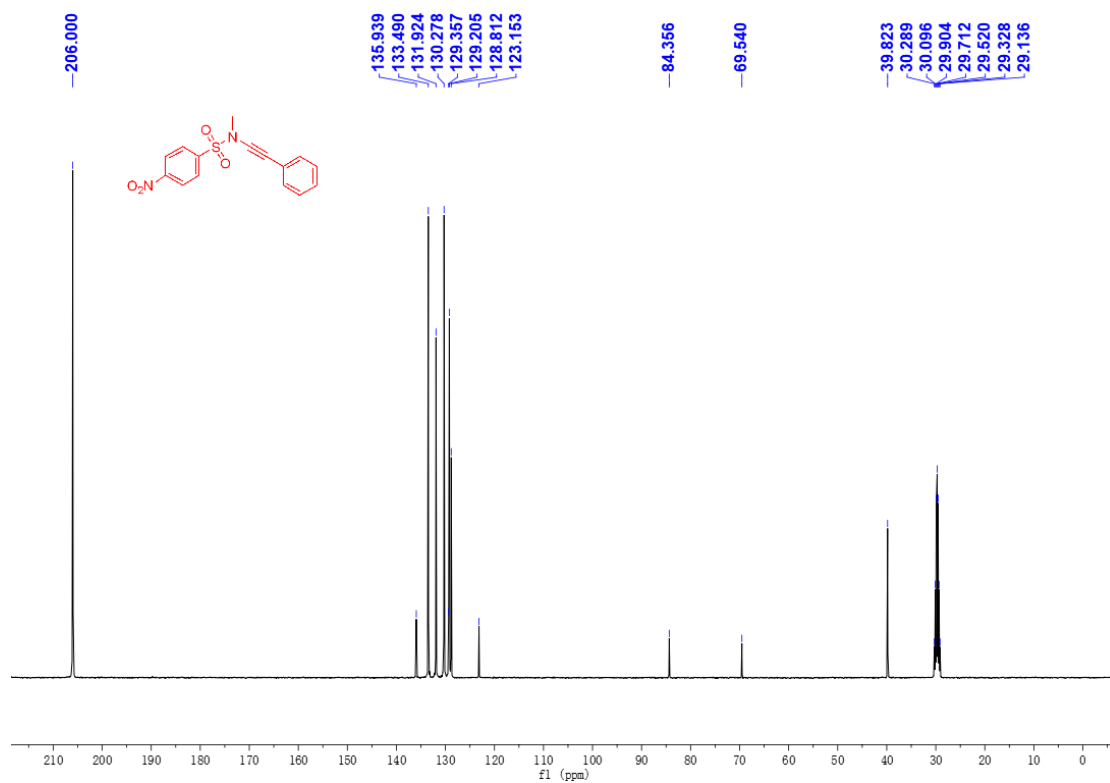

Figure S8. <sup>13</sup>C NMR spectrum (101 MHz, CD<sub>3</sub>COCD<sub>3</sub>) of *N*-methyl-4-nitro-*N*-(phenylethynyl)benzenesulfonamide (**1d**)

*N*,4-Dimethyl-*N*-(4-methylphenylethynyl)benzenesulfonamide (**1e**)

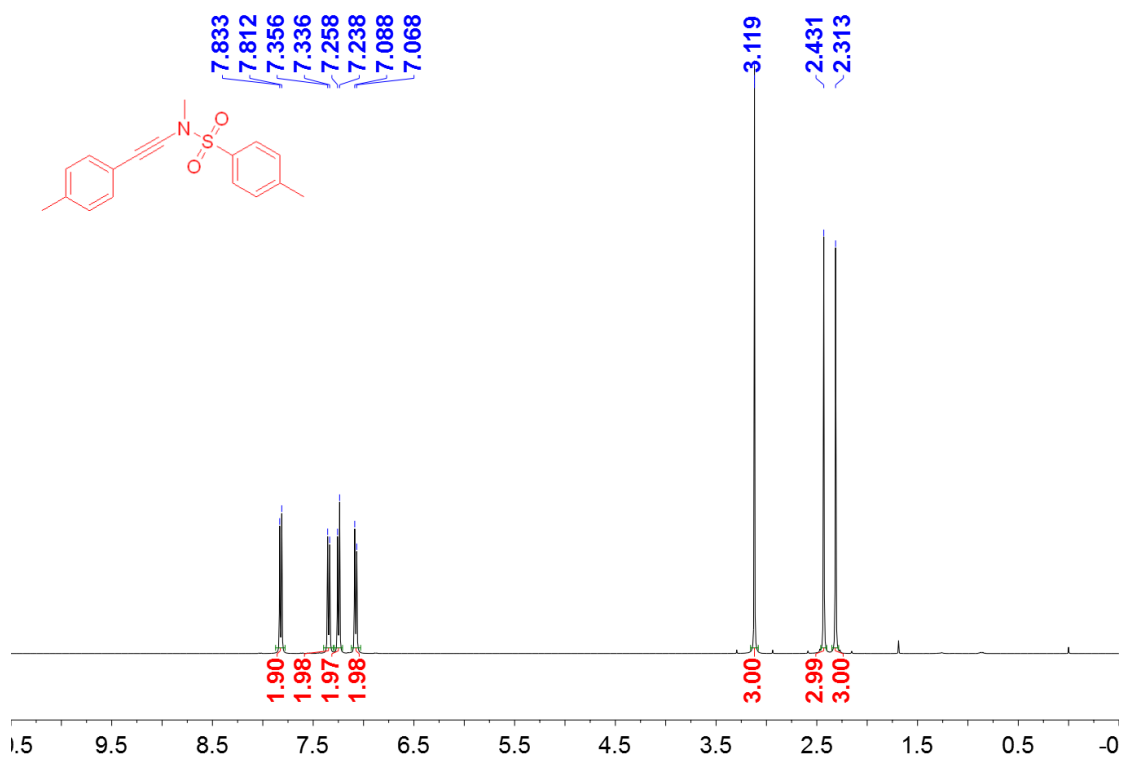

Figure S9. <sup>1</sup>H NMR spectrum (400 MHz, CDCl<sub>3</sub>) of *N*,4-dimethyl-*N*-(4-methylphenylethynyl)benzenesulfonamide (**1e**)

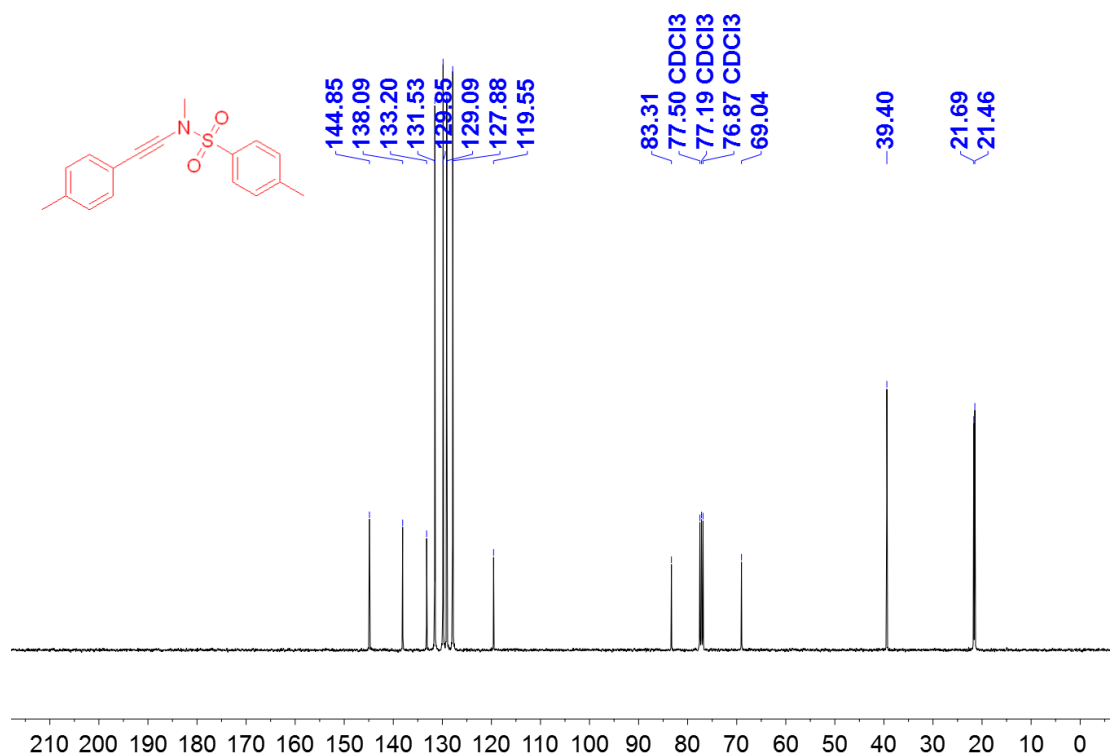

Figure S10. <sup>13</sup>C NMR spectrum (101 MHz, CDCl<sub>3</sub>) of *N*,4-dimethyl-*N*-(4-methylphenylethynyl)benzenesulfonamide (**1e**)

*N*-((4-Fluorophenyl)ethynyl)-*N*,4-dimethylbenzenesulfonamide (**1f**)

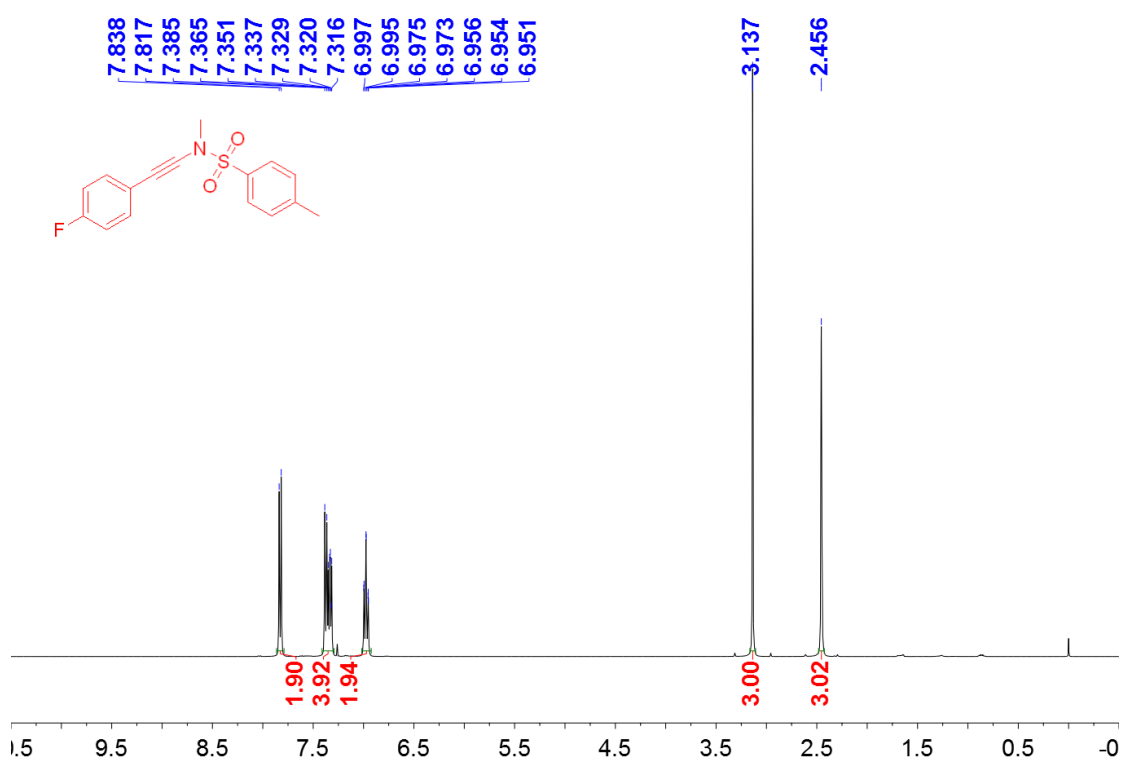

Figure S11.  $^1\text{H}$  NMR spectrum (400 MHz,  $\text{CDCl}_3$ ) of *N*-((4-fluorophenyl)ethynyl)-*N*,4-dimethylbenzenesulfonamide (**1f**)

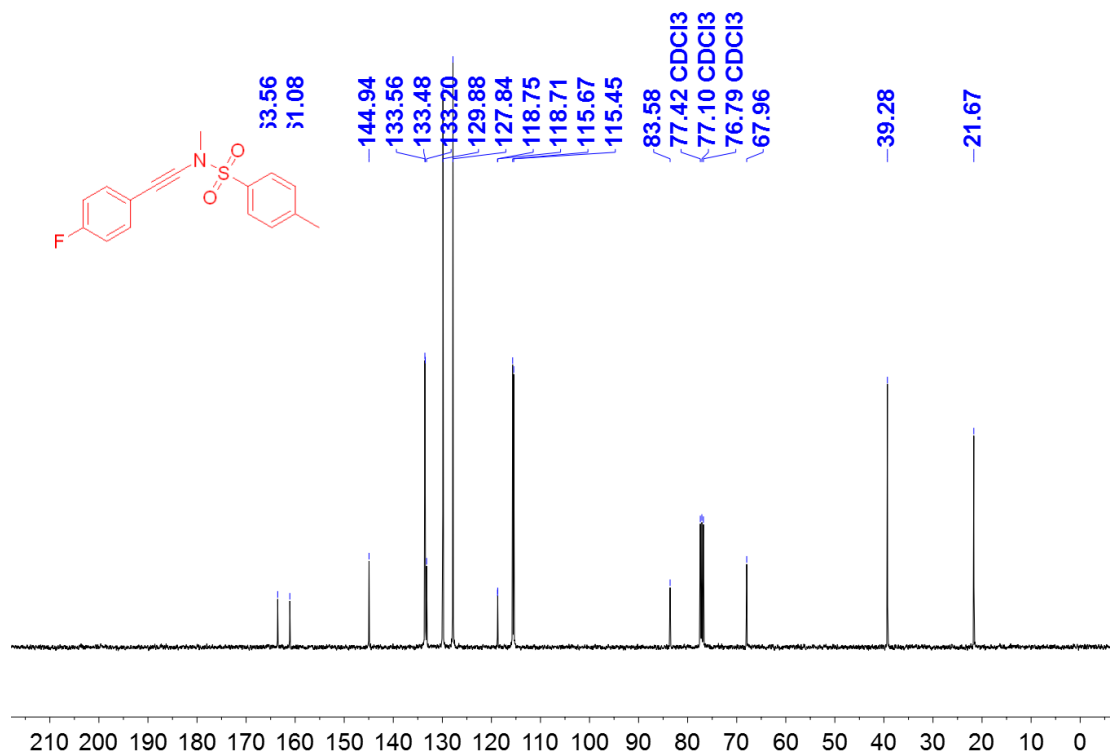

Figure S12.  $^{13}\text{C}$  NMR spectrum (101 MHz,  $\text{CDCl}_3$ ) of *N*-((4-fluorophenyl)ethynyl)-*N*,4-dimethylbenzenesulfonamide (**1f**)

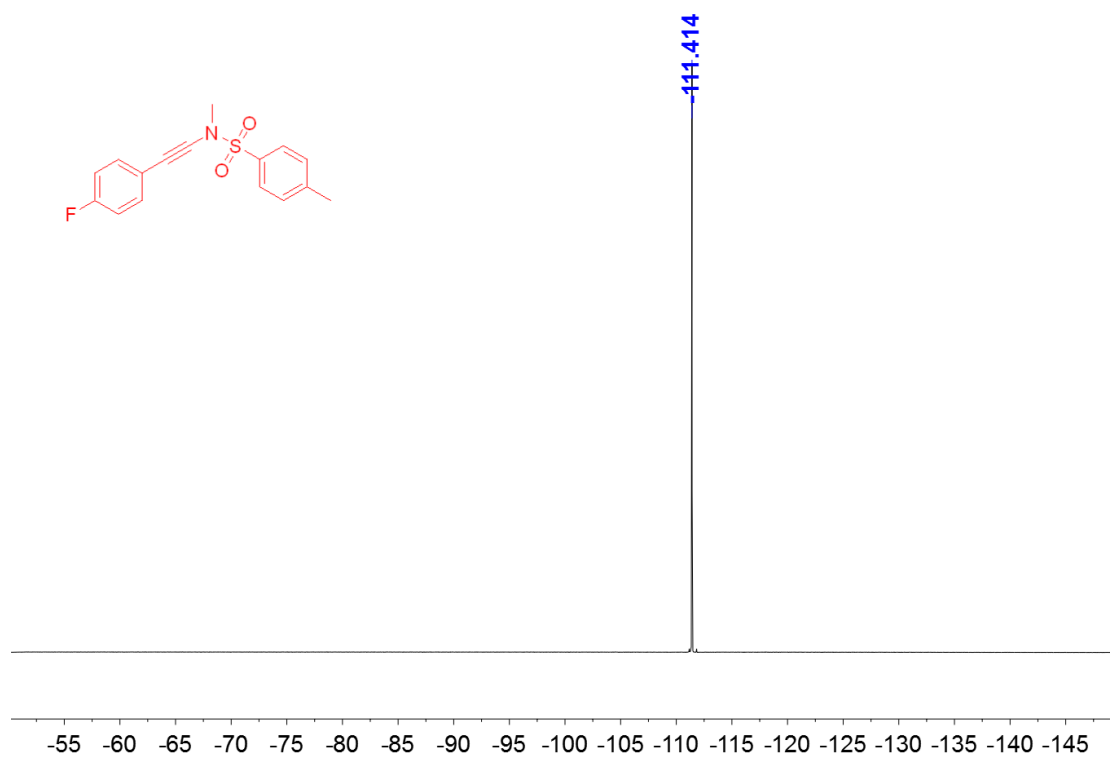

Figure S13. <sup>19</sup>F NMR spectrum (377 MHz, CDCl<sub>3</sub>) of *N*-((4-fluorophenyl)ethynyl)-*N*,4-dimethylbenzenesulfonamide (**1f**)

*N*-((4-Chlorophenyl)ethynyl)-*N*,4-dimethylbenzenesulfonamide (**1g**)

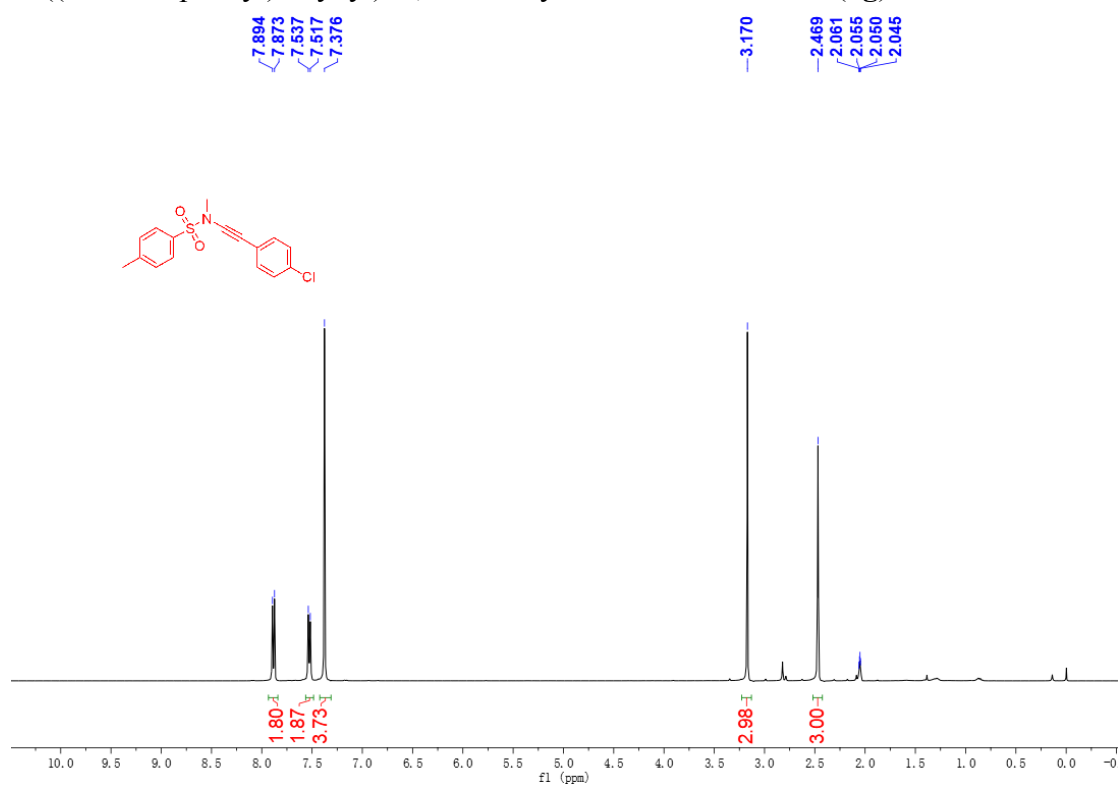

Figure S14. <sup>1</sup>H NMR spectrum (400 MHz, CD<sub>3</sub>COCD<sub>3</sub>) of *N*-((4-chlorophenyl)ethynyl)-*N*,4-dimethylbenzenesulfonamide (**1g**)

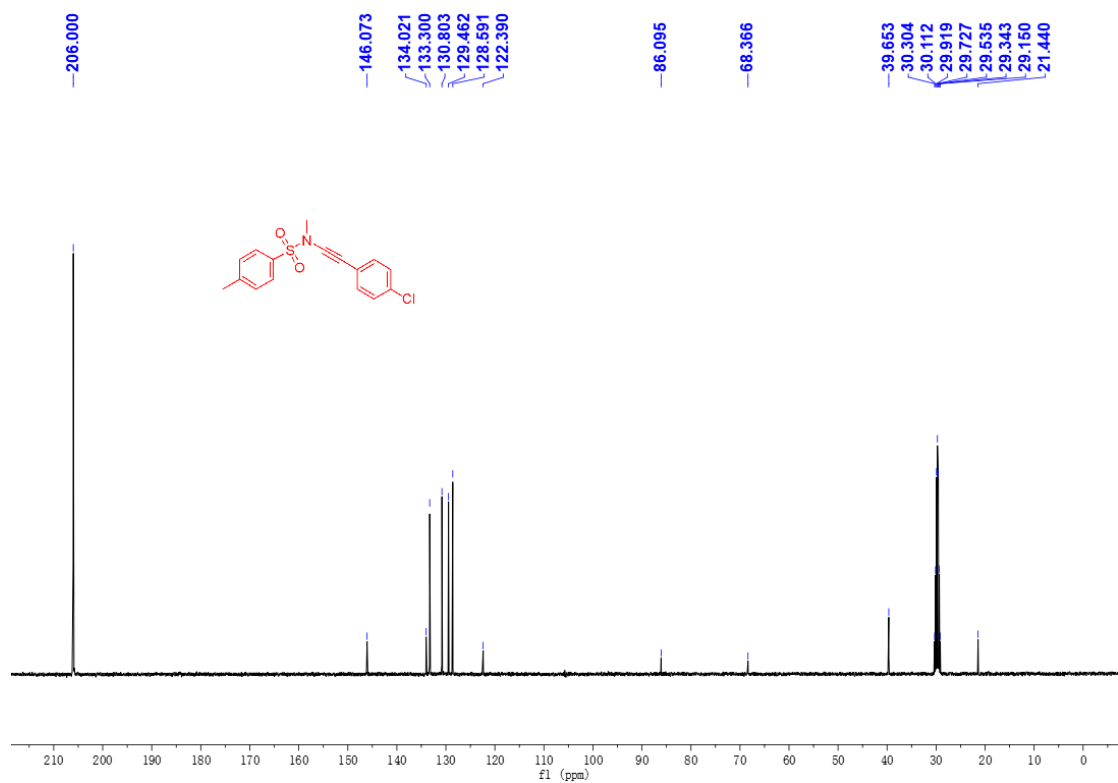

Figure S15. <sup>13</sup>C NMR spectrum (101 MHz, CD<sub>3</sub>COCD<sub>3</sub>) of *N*-((4-chlorophenyl)ethynyl)-*N*,4-dimethylbenzenesulfonamide (**1g**)

*N*-((4-Bromophenyl)ethynyl)-*N*,4-dimethylbenzenesulfonamide (**1h**)

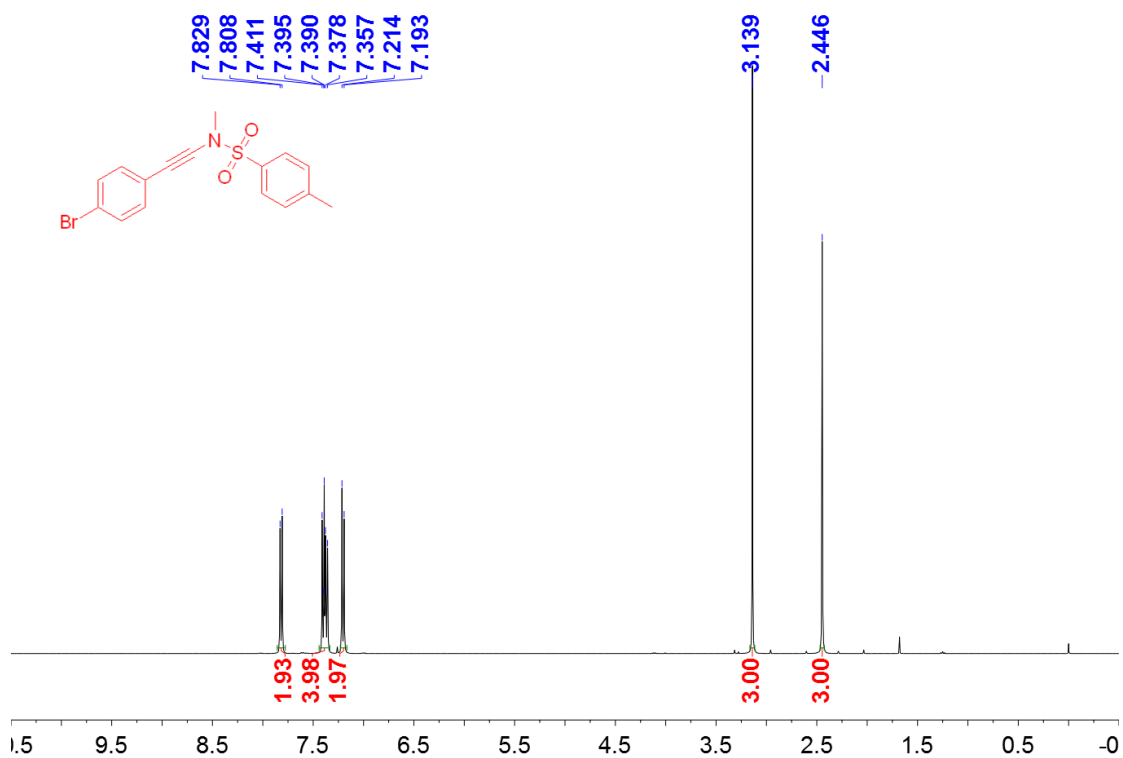

Figure S16. <sup>1</sup>H NMR spectrum (400 MHz, CD<sub>3</sub>COCD<sub>3</sub>) of *N*-((4-bromophenyl)ethynyl)-*N*,4-dimethylbenzenesulfonamide (**1h**)

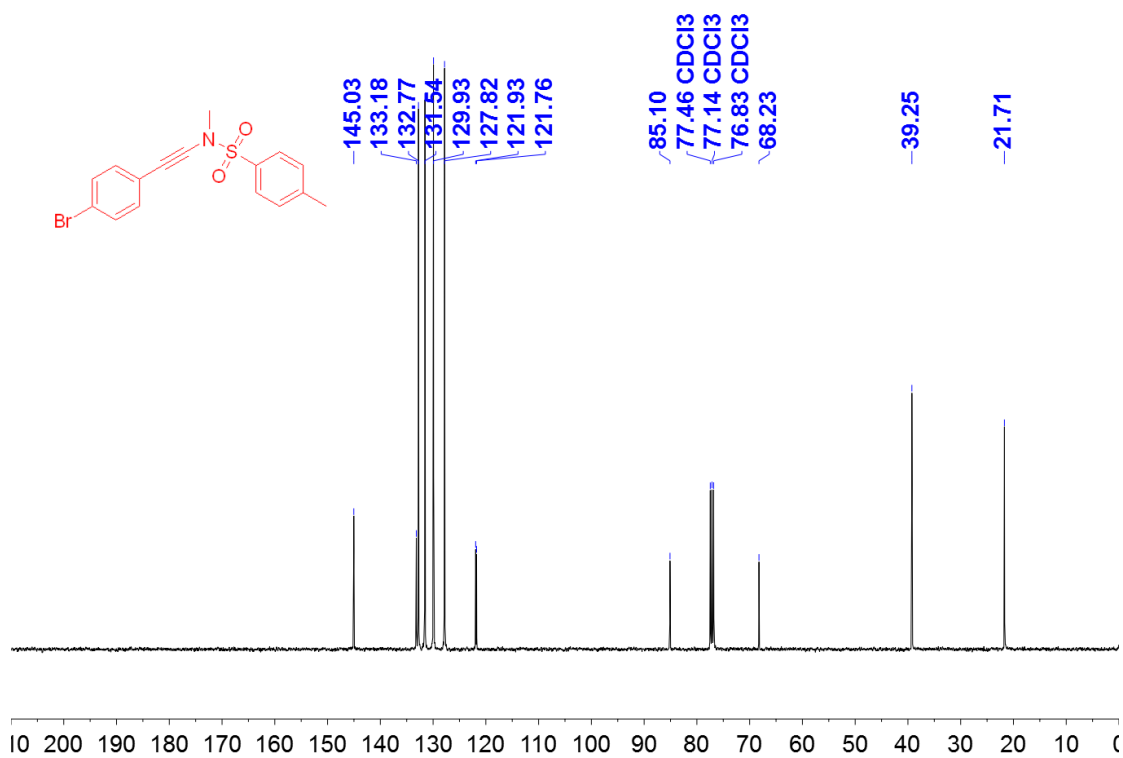

Figure S17. <sup>13</sup>C NMR spectrum (101 MHz, CD<sub>3</sub>COCD<sub>3</sub>) of *N*-((4-bromophenyl)ethynyl)-*N*,4-dimethylbenzenesulfonamide (**1h**)

*N*,4-Dimethyl-*N*-(thiophen-3-ylethynyl)benzenesulfonamide (**1i**)

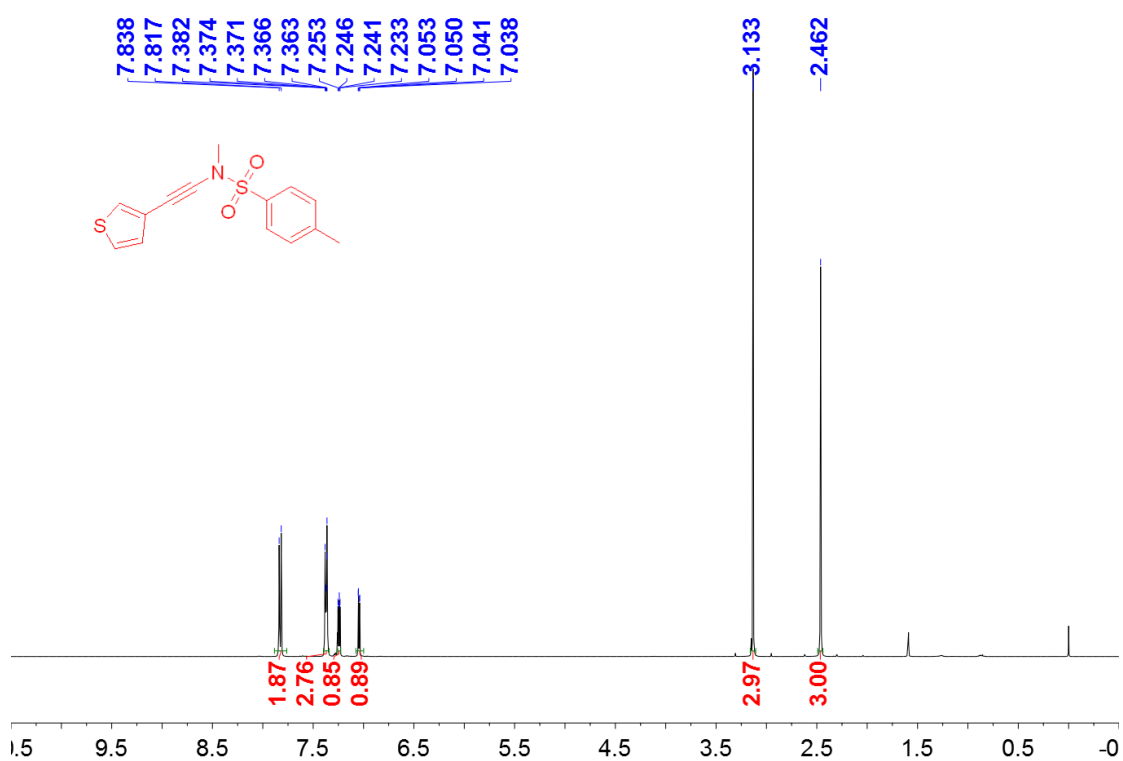

Figure S18. <sup>1</sup>H NMR spectrum (400 MHz, CDCl<sub>3</sub>) of *N*,4-dimethyl-*N*-(thiophen-3-ylethynyl)benzenesulfonamide (**1i**)

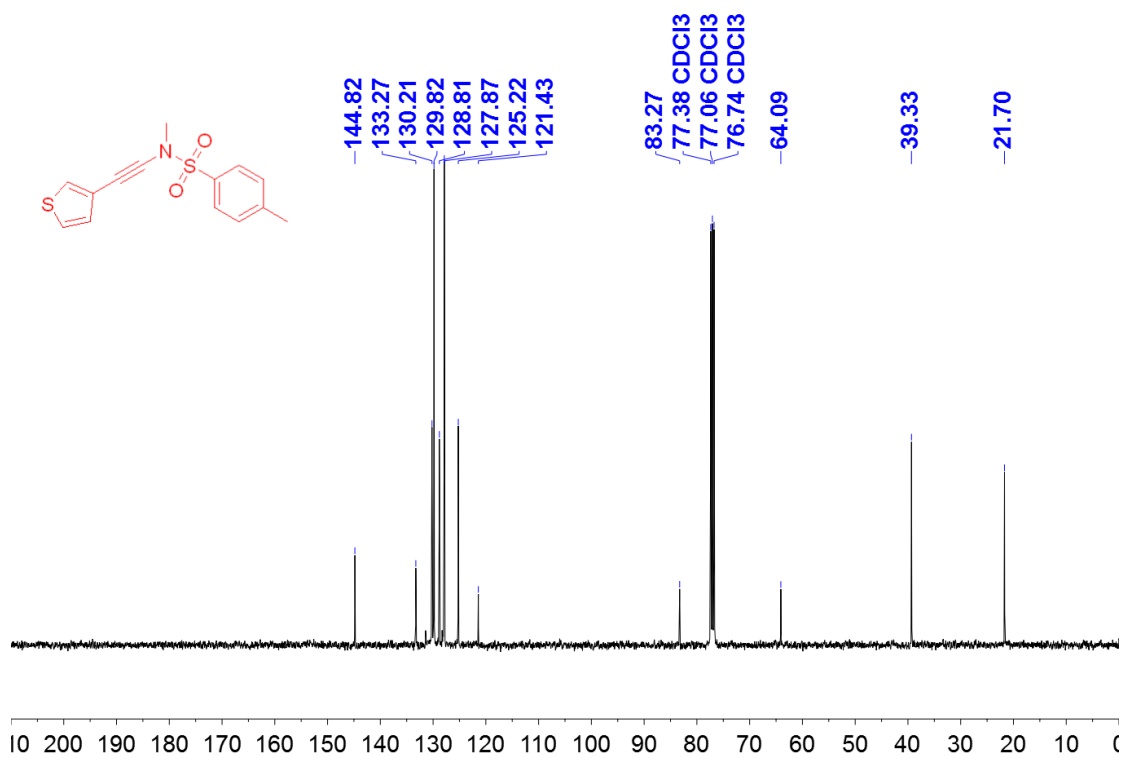

Figure S19. <sup>13</sup>C NMR spectrum (101 MHz, CDCl<sub>3</sub>) of *N*,4-dimethyl-*N*-(thiophen-3-ylethynyl)benzenesulfonamide (**1i**)



*N*-Ethyl-4-methyl-*N*-(phenylethynyl)benzenesulfonamide (**1j**)

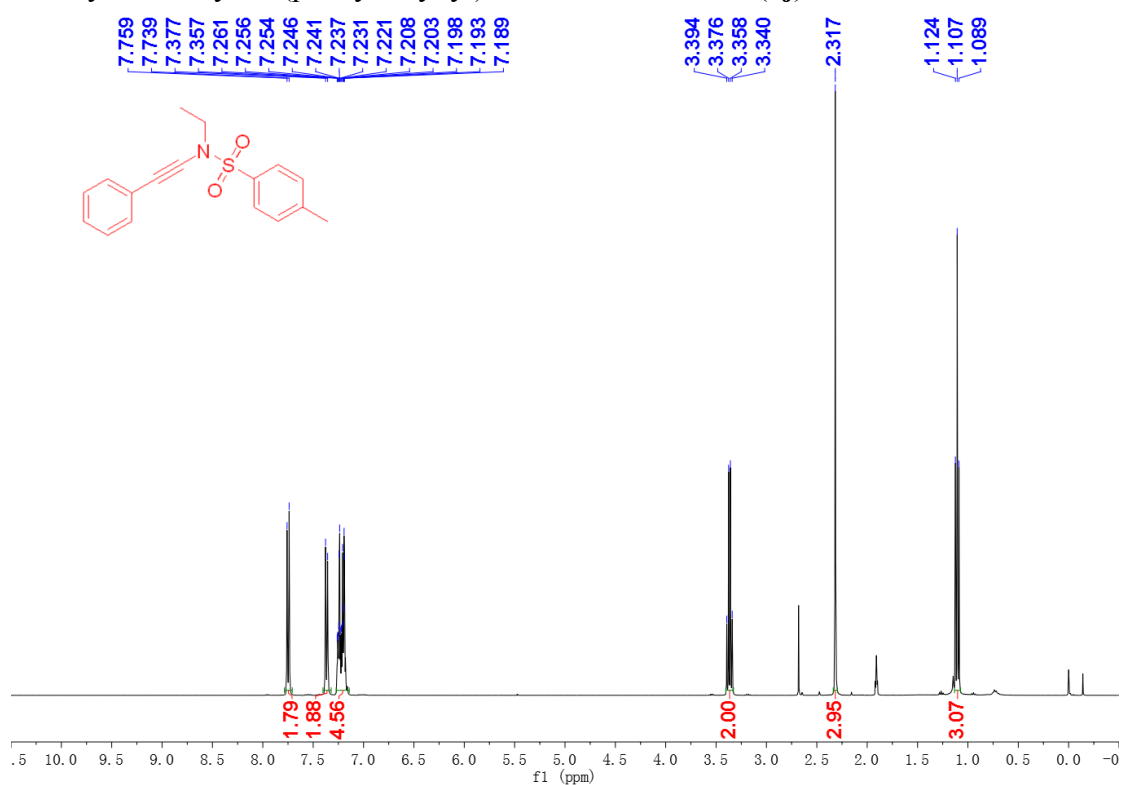

Figure S20. <sup>1</sup>H NMR spectrum (400 MHz, CD<sub>3</sub>COCD<sub>3</sub>) of *N*-ethyl-4-methyl-*N*-(phenylethynyl)benzenesulfonamide (**1j**)

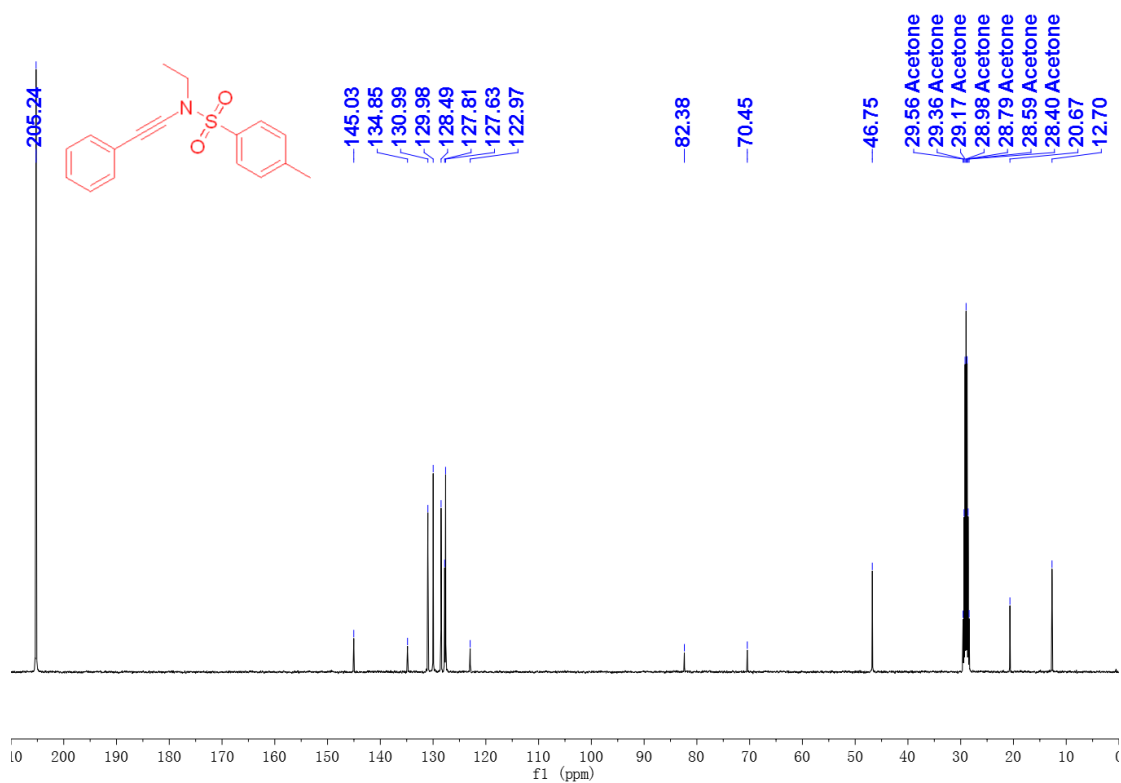

Figure S21. <sup>13</sup>C NMR spectrum (101 MHz, CD<sub>3</sub>COCD<sub>3</sub>) of *N*-ethyl-4-methyl-*N*-(phenylethynyl)benzenesulfonamide (**1j**)

*N*-Butyl-4-methyl-*N*-(phenylethynyl)benzenesulfonamide (**1k**)

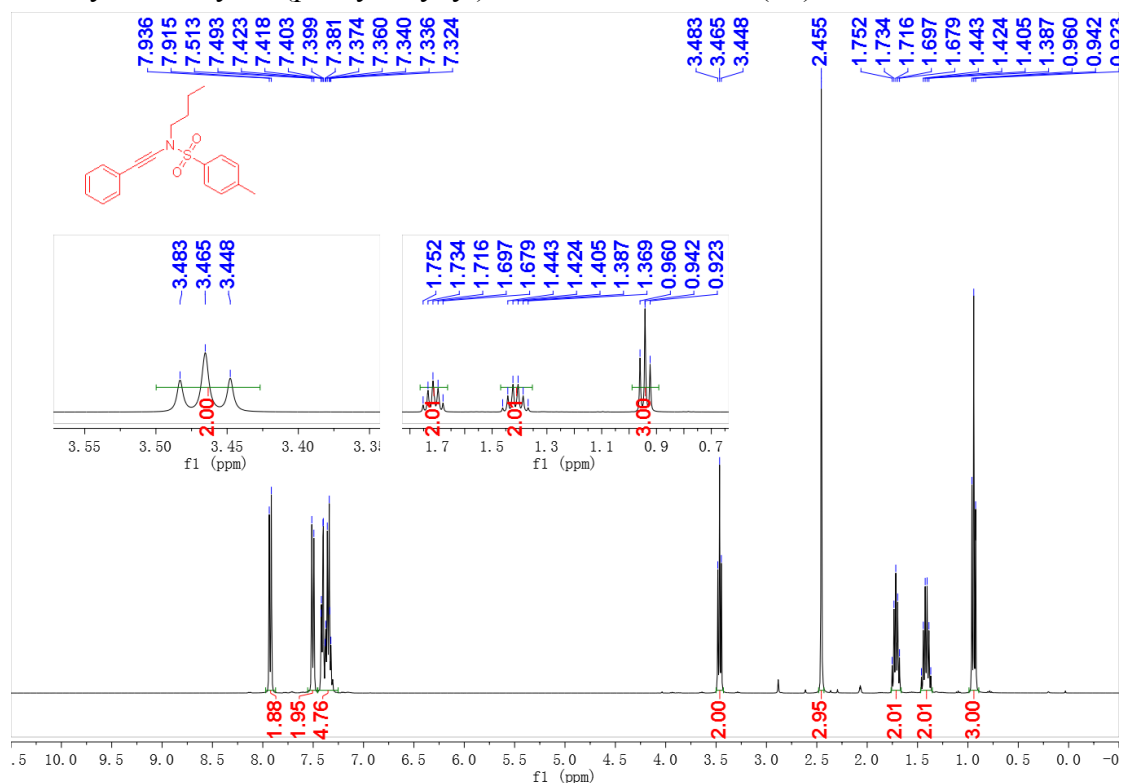

Figure S22. <sup>1</sup>H NMR spectrum (400 MHz, CD<sub>3</sub>COCD<sub>3</sub>) of *N*-butyl-4-methyl-*N*-(phenylethynyl)benzenesulfonamide (**1k**)

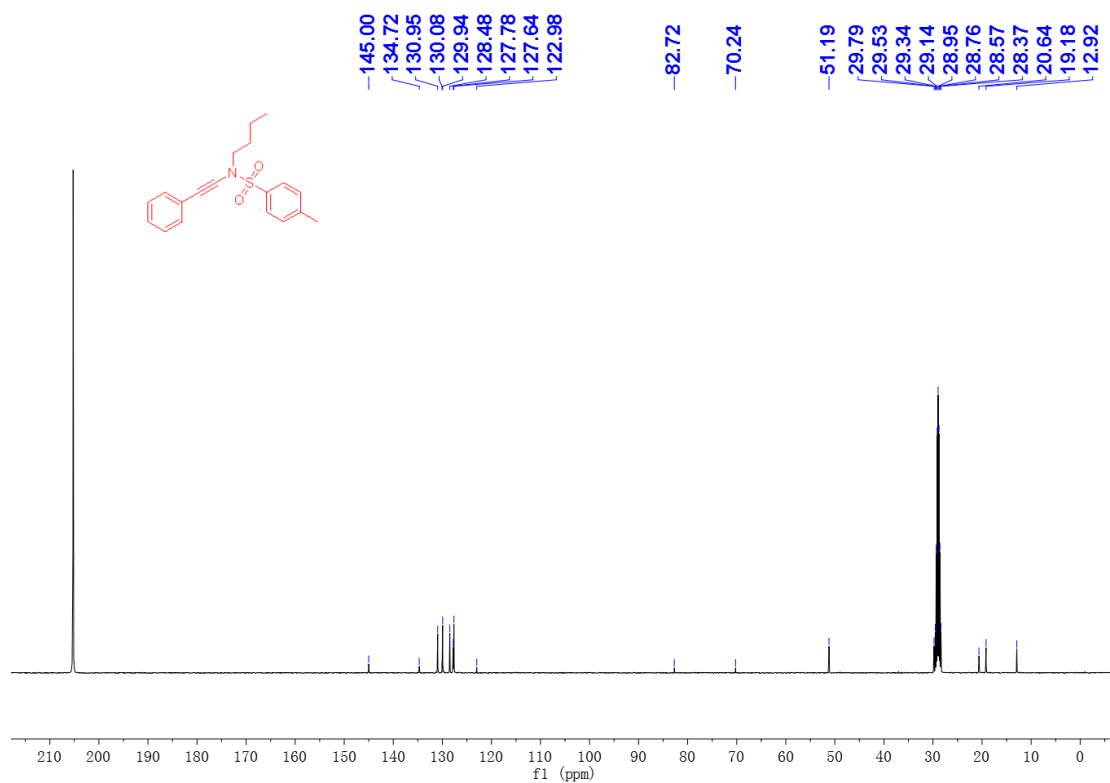

Figure S23. <sup>13</sup>C NMR spectrum (101 MHz, CD<sub>3</sub>COCD<sub>3</sub>) of *N*-butyl-4-methyl-*N*-(phenylethynyl)benzenesulfonamide (**1k**)

*N*-Cyclohexyl-4-methyl-*N*-(phenylethynyl)benzenesulfonamide (**11**)

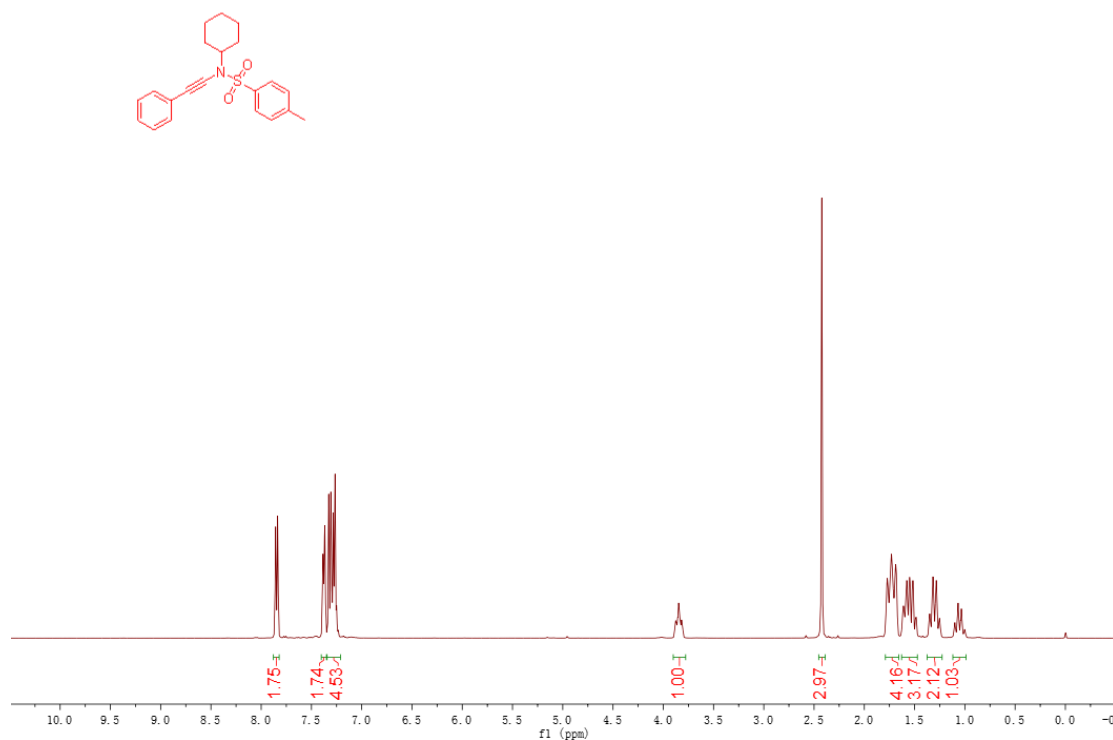

Figure S24 <sup>1</sup>H NMR spectrum (400 MHz, CDCl<sub>3</sub>) of *N*-cyclohexyl-4-methyl-*N*-(phenylethynyl)benzenesulfonamide (**11**)

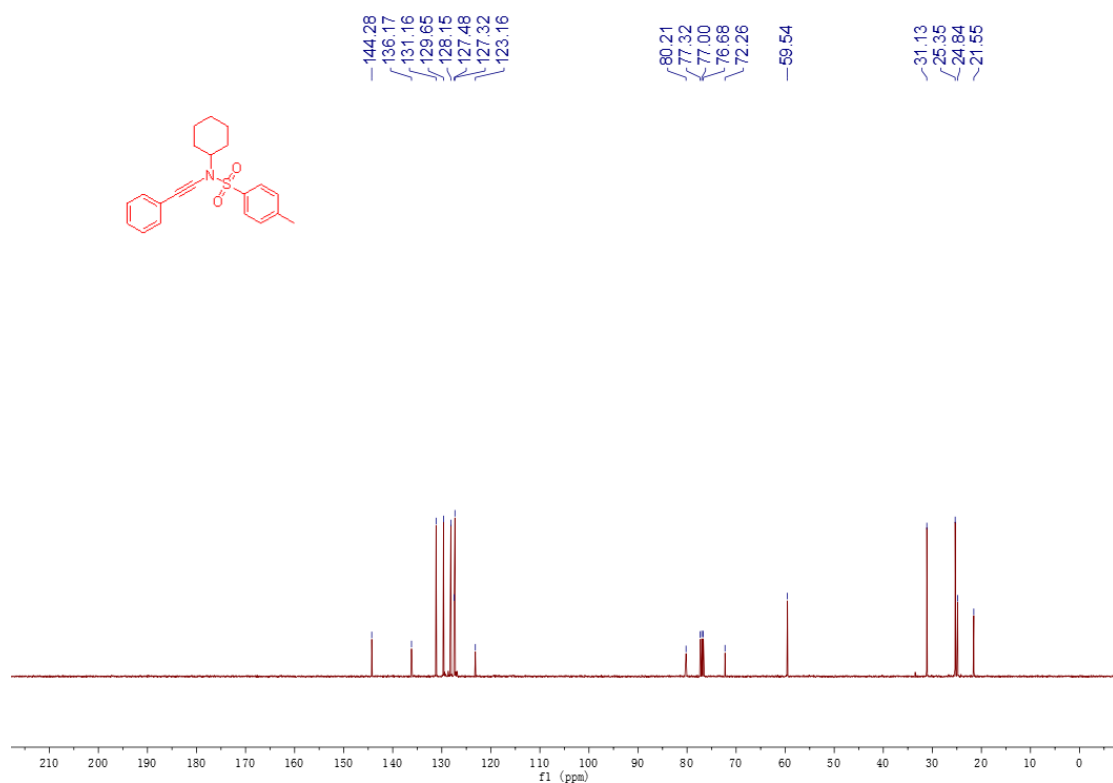

Figure S25 <sup>13</sup>C NMR spectrum (101 MHz, CDCl<sub>3</sub>) of *N*-cyclohexyl-4-methyl-*N*-(phenylethynyl)benzenesulfonamide (**11**)

*N*-Cyclopropyl-4-methyl-*N*-(phenylethynyl)benzenesulfonamide (**1m**)

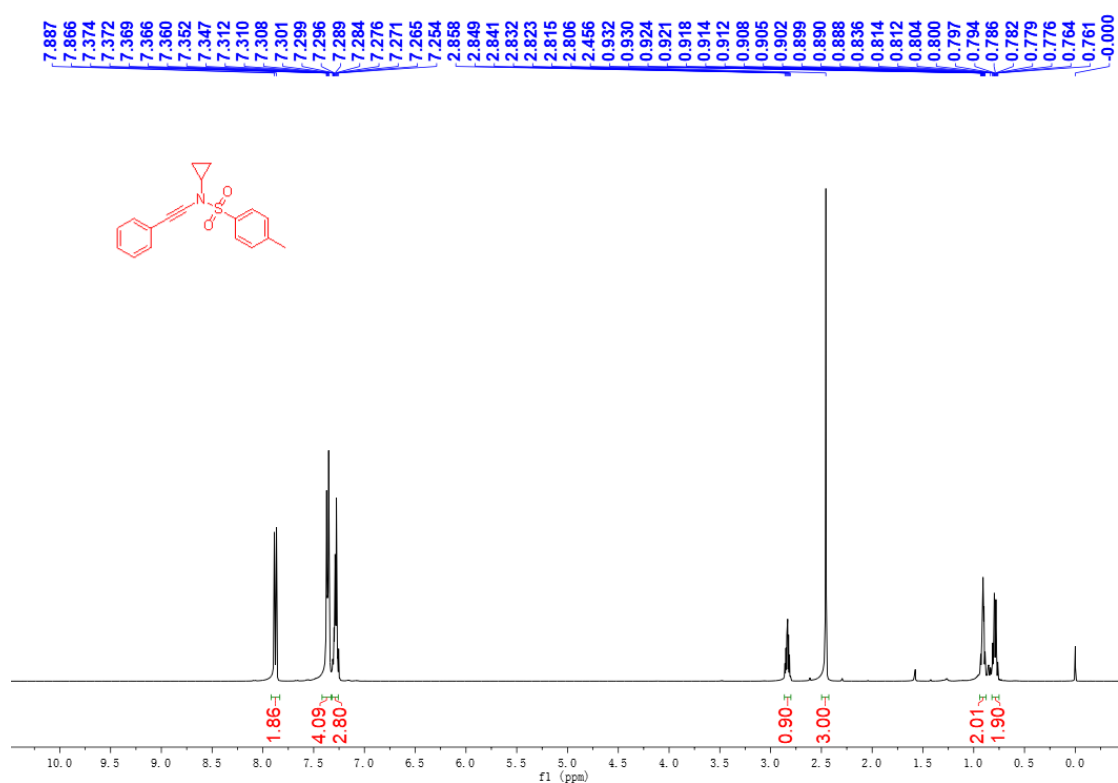

Figure S26. <sup>1</sup>H NMR spectrum (400 MHz, CDCl<sub>3</sub>) of *N*-cyclopropyl-4-methyl-*N*-(phenylethynyl)benzenesulfonamide (**1m**)

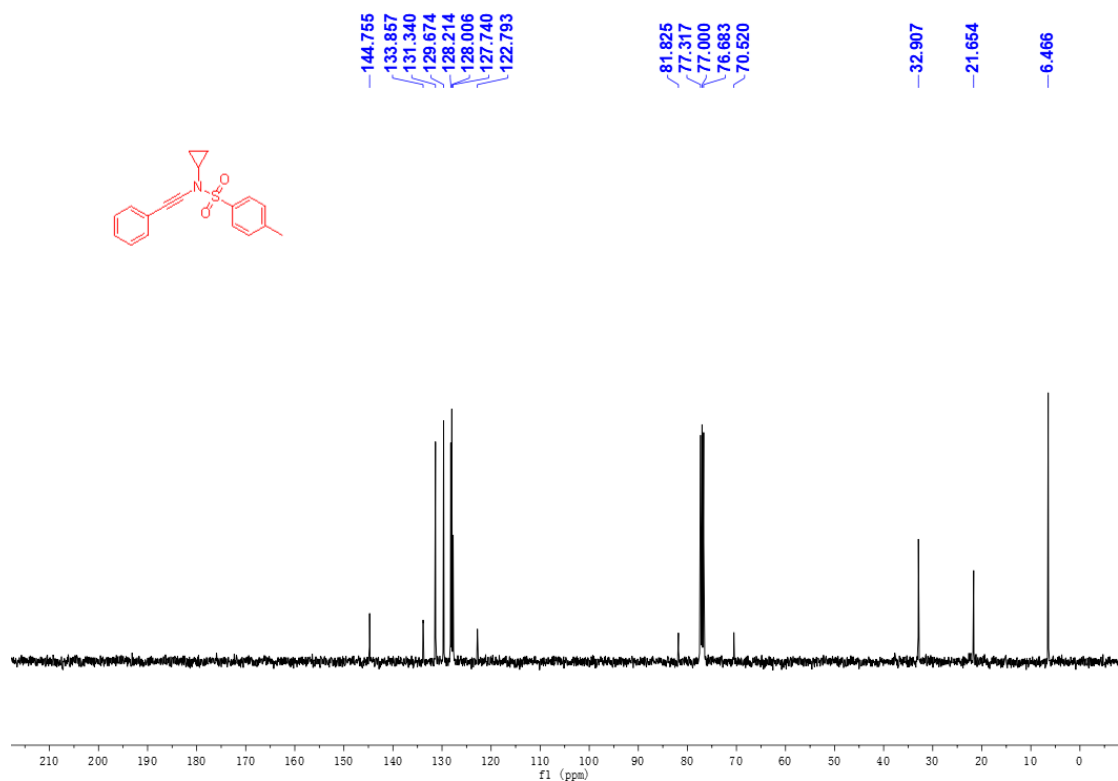

Figure S27. <sup>13</sup>C NMR spectrum (101 MHz, CDCl<sub>3</sub>) of *N*-cyclopropyl-4-methyl-*N*-(phenylethynyl)benzenesulfonamide (**1m**)

*N*-Benzyl-4-methyl-*N*-(phenylethynyl)benzenesulfonamide (**1n**)

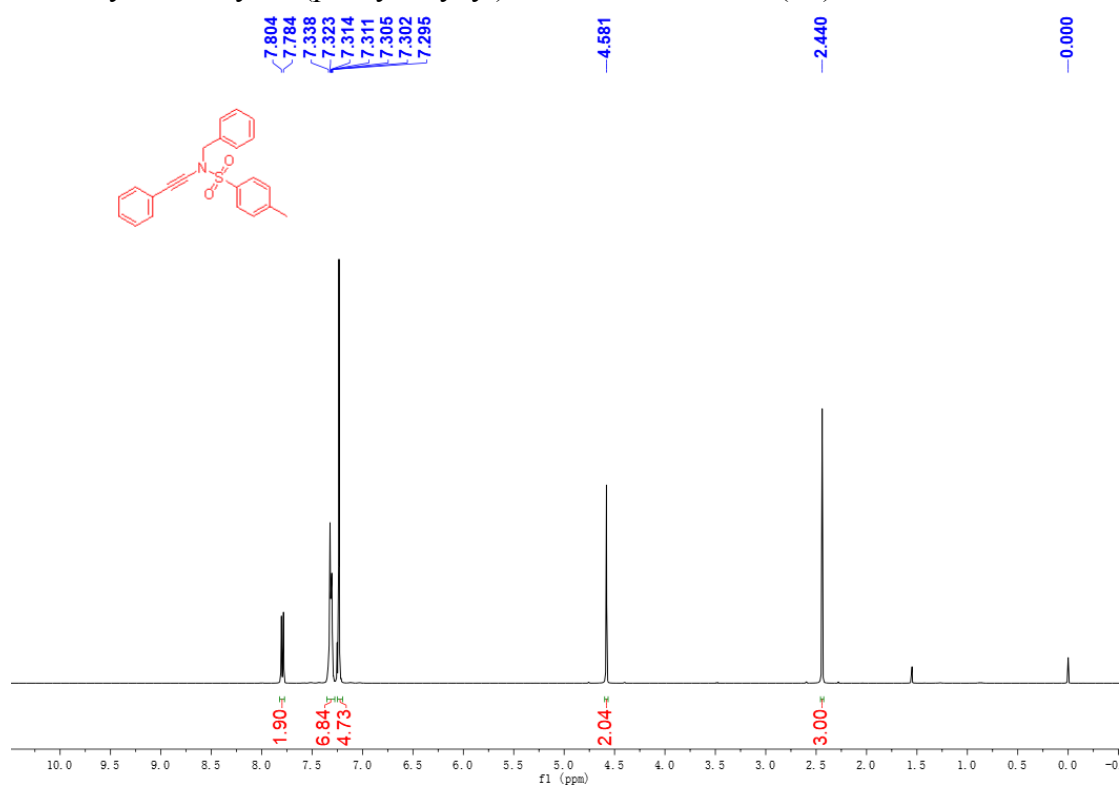

Figure S28. <sup>1</sup>H NMR spectrum (400 MHz, CDCl<sub>3</sub>) of *N*-benzyl-4-methyl-*N*-(phenylethynyl)benzenesulfonamide (**1n**)

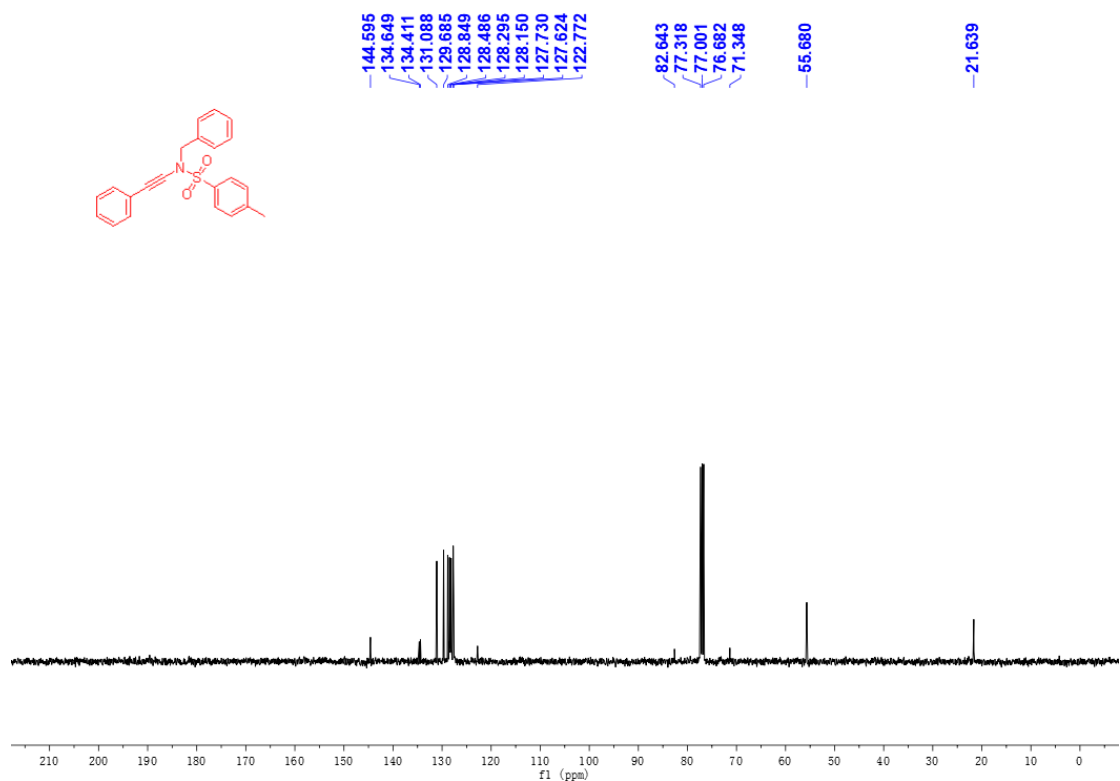

Figure S29. <sup>13</sup>C NMR spectrum (101 MHz, CDCl<sub>3</sub>) of *N*-benzyl-4-methyl-*N*-(phenylethynyl)benzenesulfonamide (**1n**)

4-Methyl-*N*-phenyl-*N*-(phenylethynyl)benzenesulfonamide (**1o**)

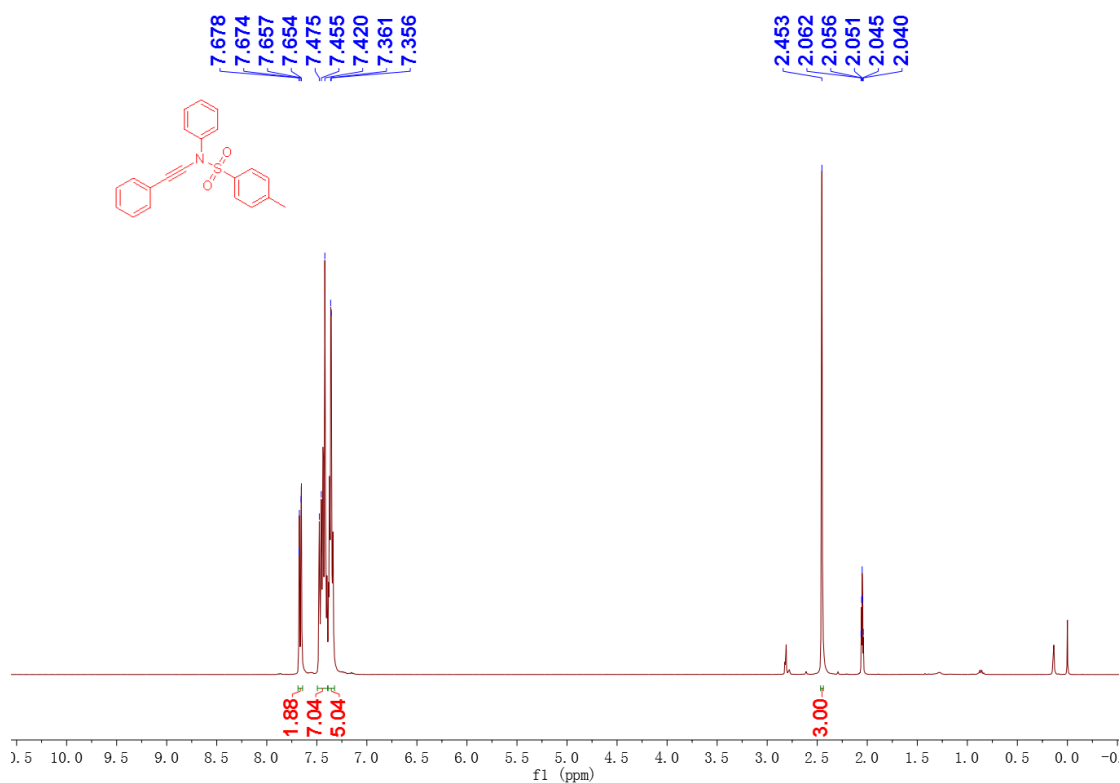

Figure S30. <sup>1</sup>H NMR spectrum (400 MHz, CD<sub>3</sub>COCD<sub>3</sub>) of 4-methyl-*N*-phenyl-*N*-(phenylethynyl)benzenesulfonamide (**1o**)

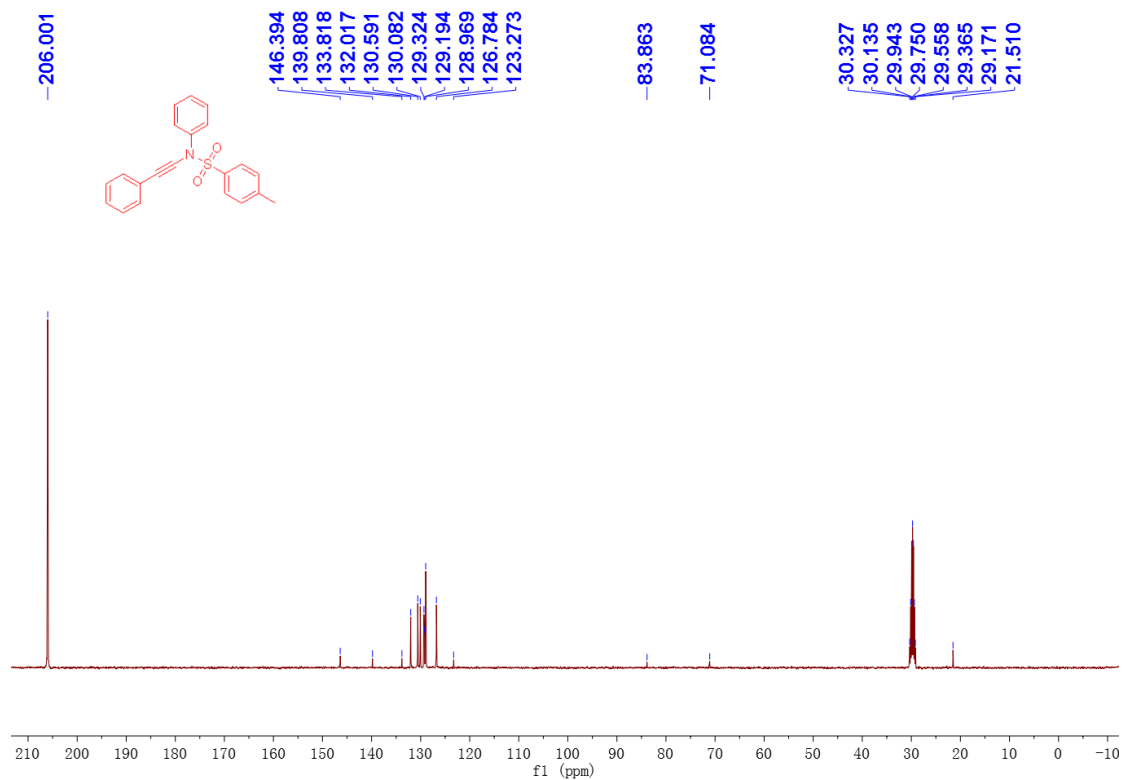

Figure S31. <sup>13</sup>C NMR spectrum (101 MHz, CD<sub>3</sub>COCD<sub>3</sub>) of 4-methyl-*N*-phenyl-*N*-(phenylethynyl)benzenesulfonamide (**1o**)

*N*-(4-Methoxyphenyl)-4-methyl-*N*-(phenylethynyl)benzenesulfonamide (**1p**)

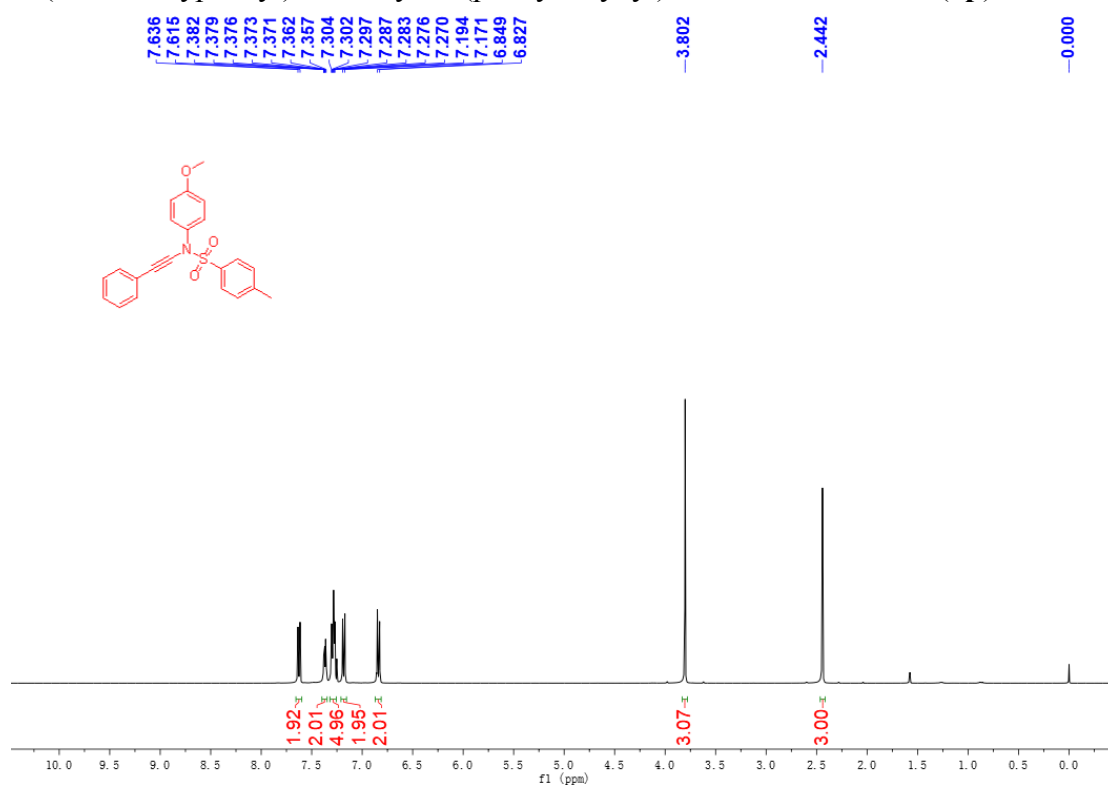

Figure S32. <sup>1</sup>H NMR spectrum (400 MHz, CDCl<sub>3</sub>) of *N*-(4-methoxyphenyl)-4-methyl-*N*-(phenylethynyl)benzenesulfonamide (**1p**)

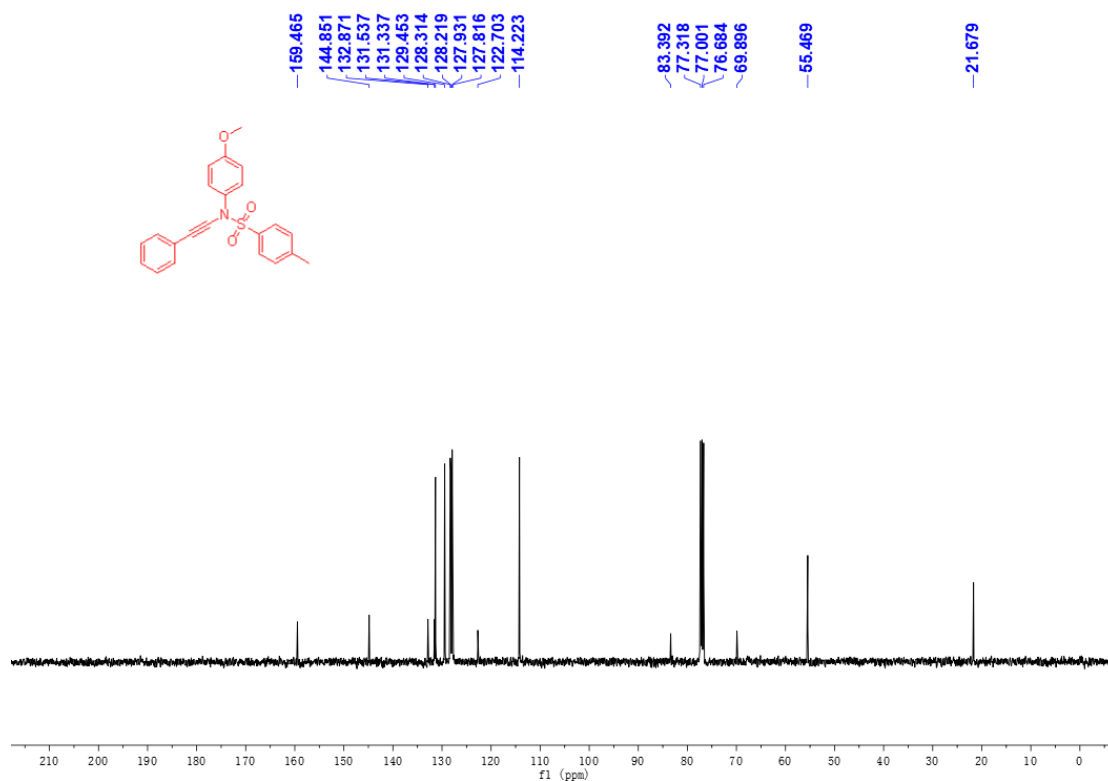

Figure S33. <sup>13</sup>C NMR spectrum (101 MHz, CDCl<sub>3</sub>) of *N*-(4-methoxyphenyl)-4-methyl-*N*-(phenylethynyl)benzenesulfonamide (**1p**)

*N*-Allyl-4-methyl-*N*-(phenylethynyl)benzenesulfonamide (**1q**)

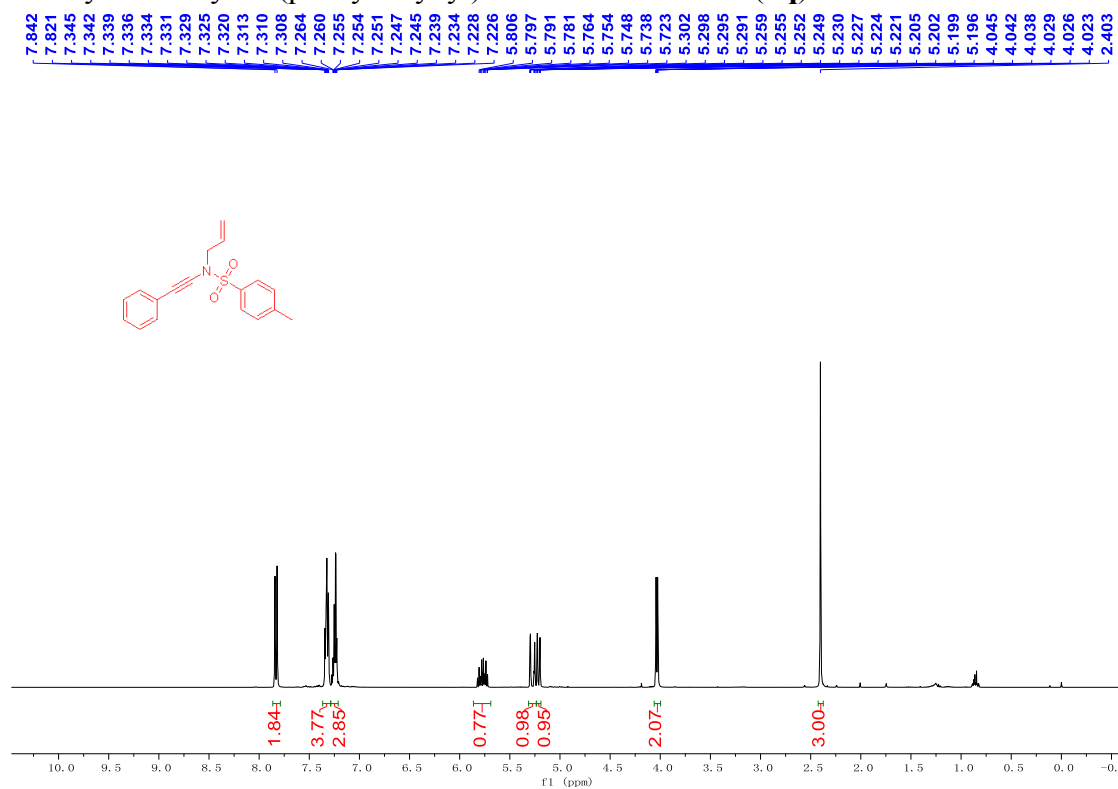

Figure S34. <sup>1</sup>H NMR spectrum (400 MHz, CDCl<sub>3</sub>) of *N*-allyl-4-methyl-*N*-(phenylethynyl)benzenesulfonamide (**1q**)

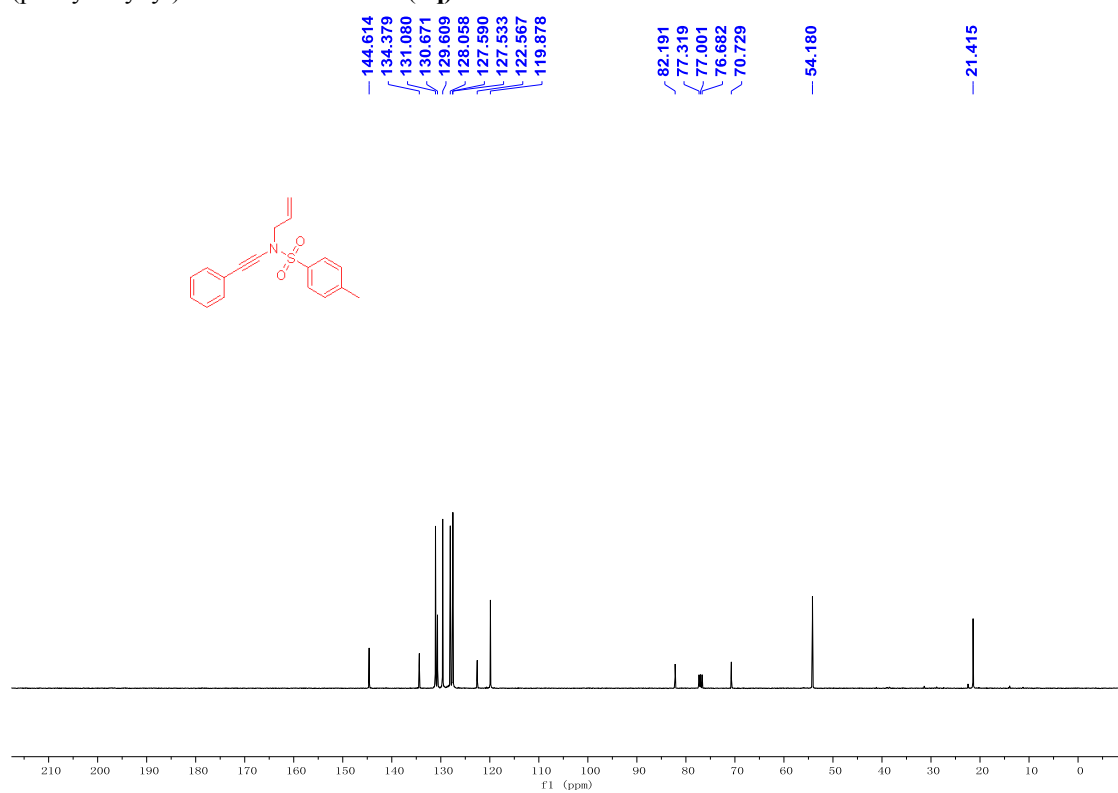

Figure S35. <sup>13</sup>C NMR spectrum (101 MHz, CDCl<sub>3</sub>) of *N*-allyl-4-methyl-*N*-(phenylethynyl)benzenesulfonamide (**1q**)



*N*-(Furan-2-ylmethyl)-4-methyl-*N*-(phenylethynyl)benzenesulfonamide (**1r**)

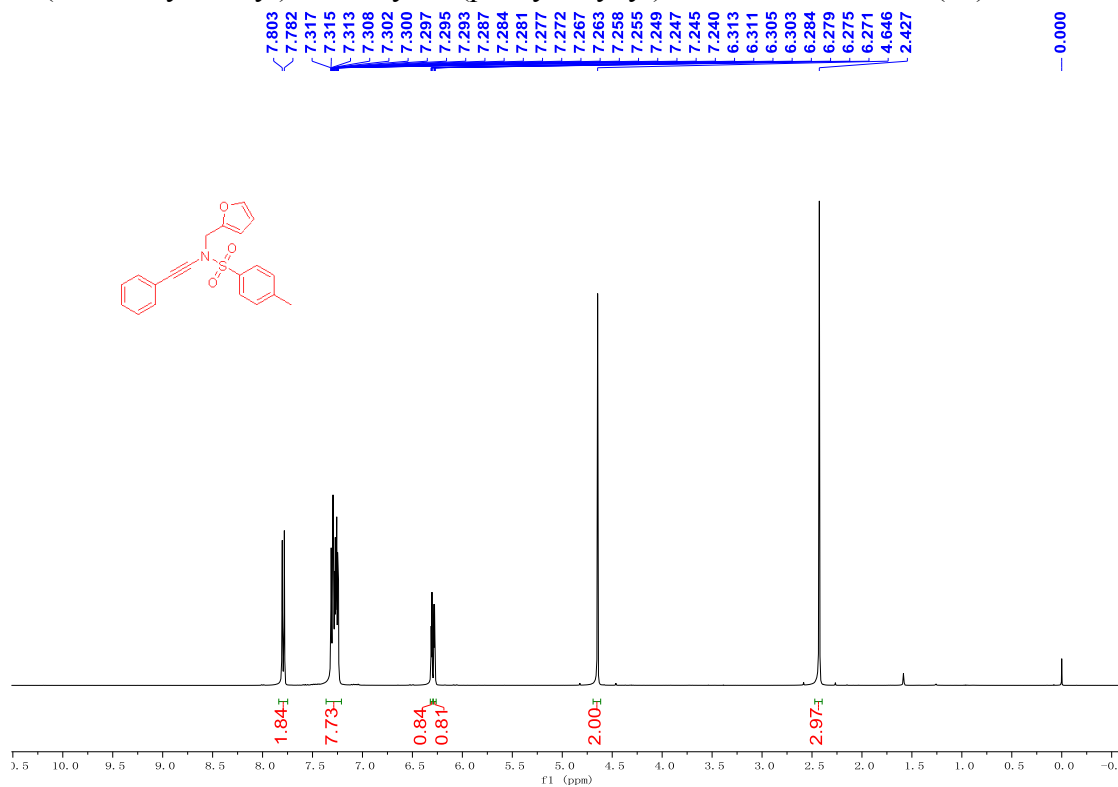

Figure S36. <sup>1</sup>H NMR spectrum (400 MHz, CDCl<sub>3</sub>) of *N*-(furan-2-ylmethyl)-4-methyl-*N*-(phenylethynyl)benzenesulfonamide (**1r**)

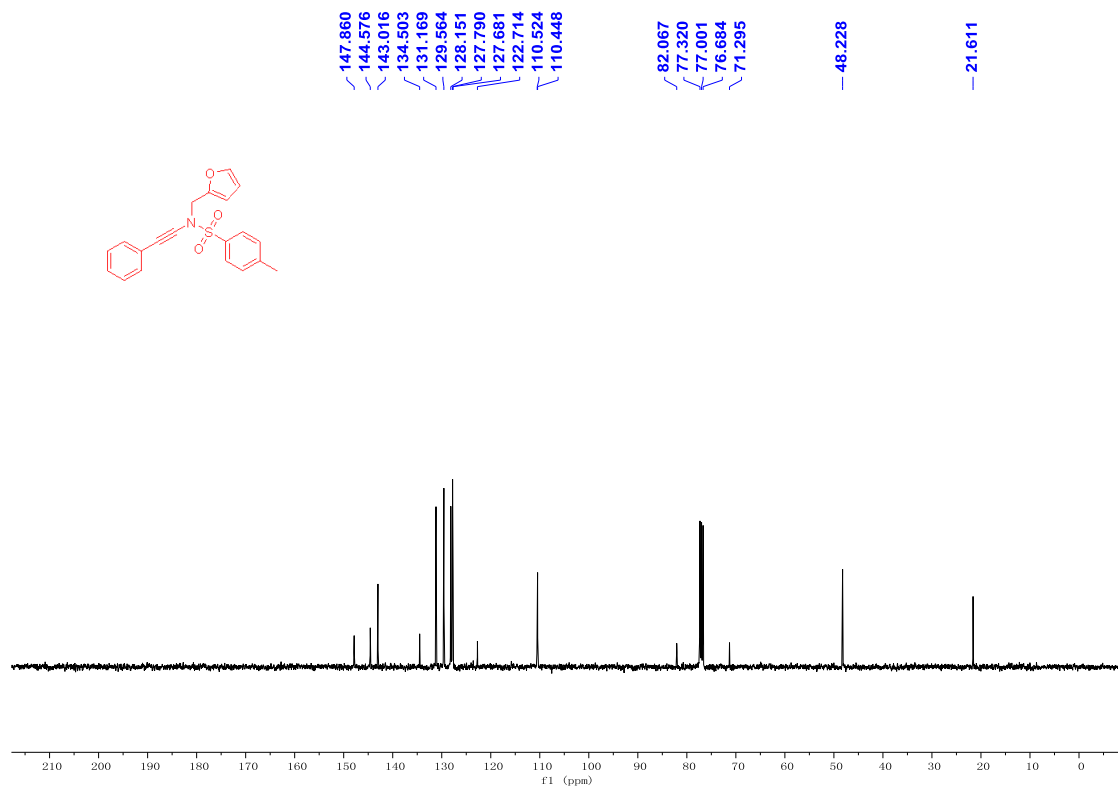

Figure S37. <sup>13</sup>C NMR spectrum (101 MHz, CDCl<sub>3</sub>) of *N*-(furan-2-ylmethyl)-4-methyl-*N*-(phenylethynyl)benzenesulfonamide (**1r**)

*N*-Methyl-*N*-(phenylethynyl)methanesulfonamide (**1s**)

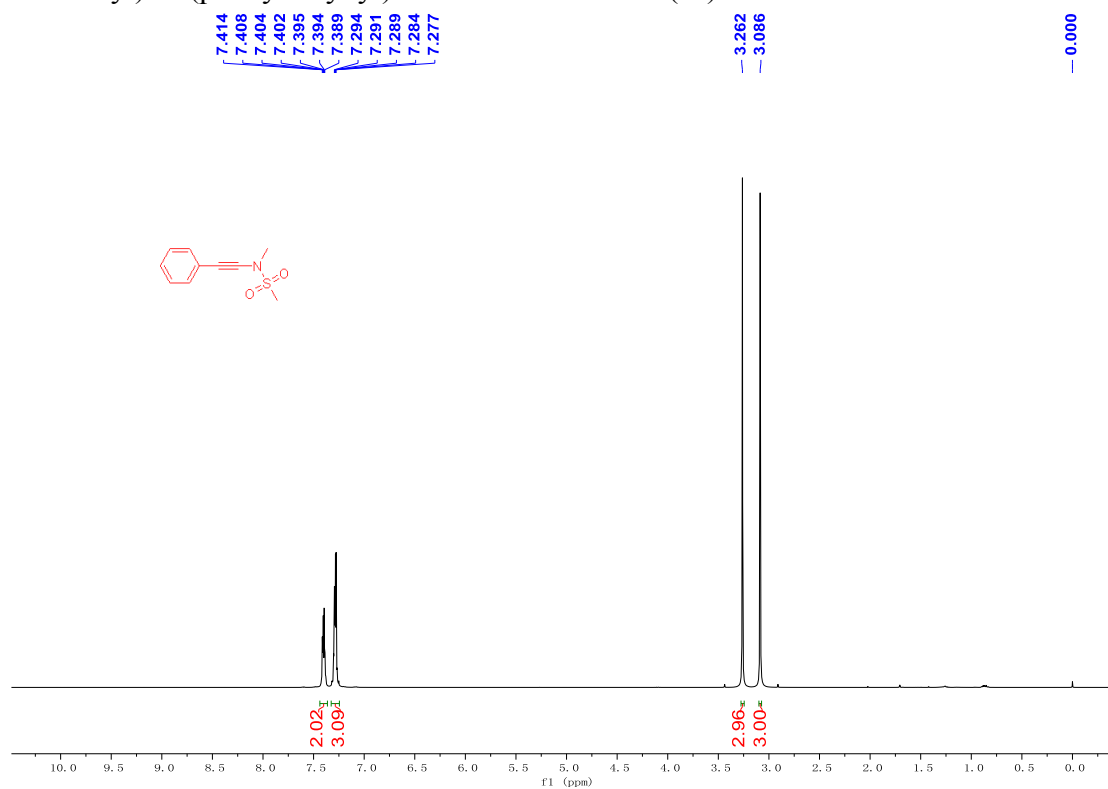

Figure S38. <sup>1</sup>H NMR spectrum (400 MHz, CDCl<sub>3</sub>) of *N*-methyl-*N*-(phenylethynyl)methanesulfonamide (**1s**)

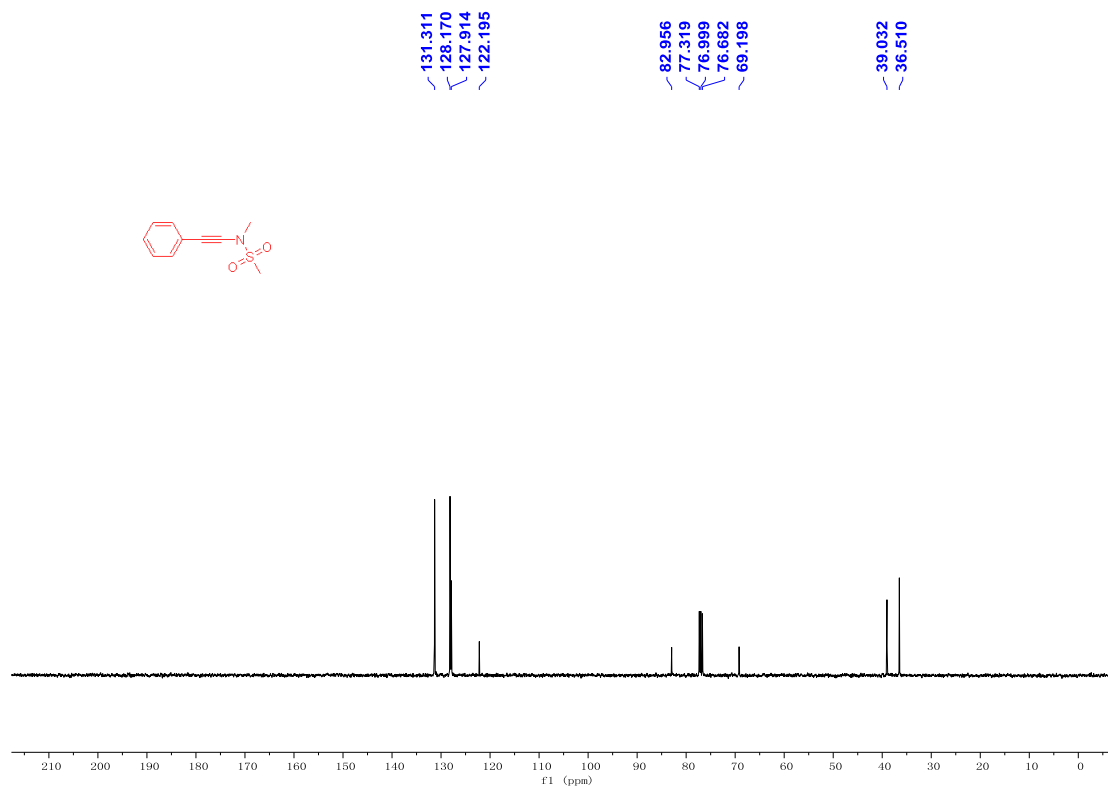

Figure S39. <sup>13</sup>C NMR spectrum (101 MHz, CDCl<sub>3</sub>) of *N*-methyl-*N*-(phenylethynyl)methanesulfonamide (**1s**)

Copies of  $^1\text{H}$ ,  $^{13}\text{C}$ , and  $^{19}\text{F}$  NMR spectra of compounds **2**.

*N*-Methyl-2-oxo-2-phenyl-*N*-tosylacetamide (**2a**)

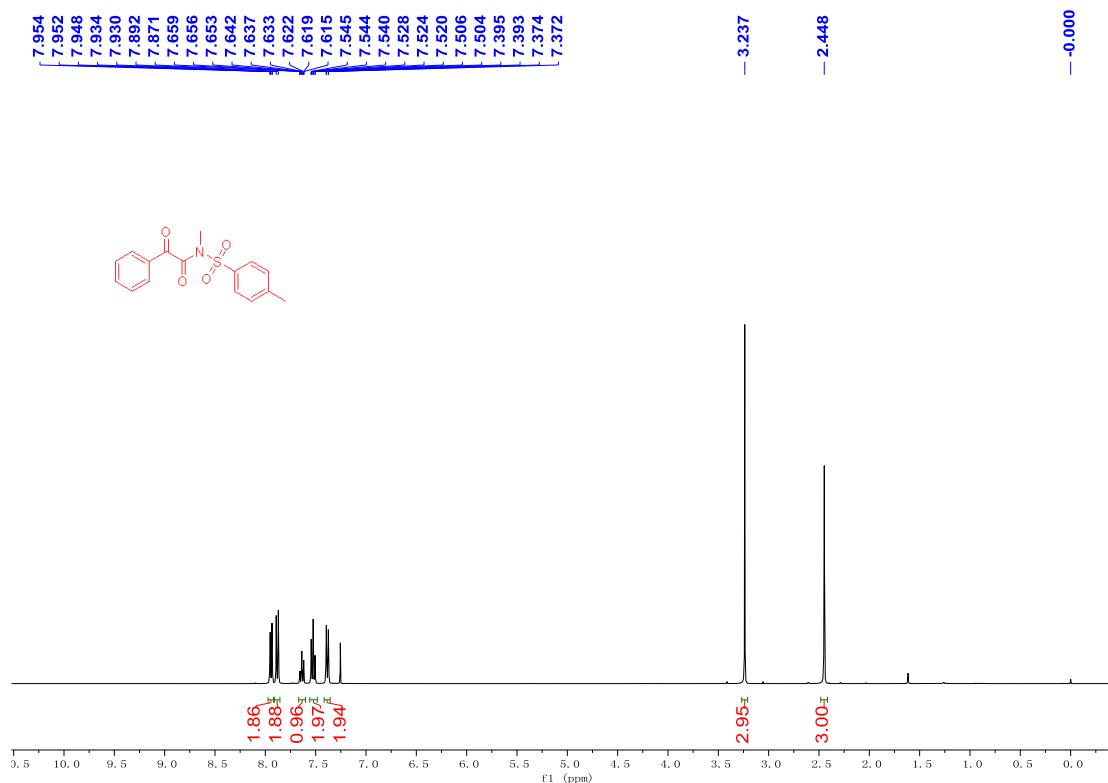

Figure S40.  $^1\text{H}$  NMR spectrum (400 MHz,  $\text{CDCl}_3$ ) of *N*-methyl-2-oxo-2-phenyl-*N*-tosylacetamide (**2a**)

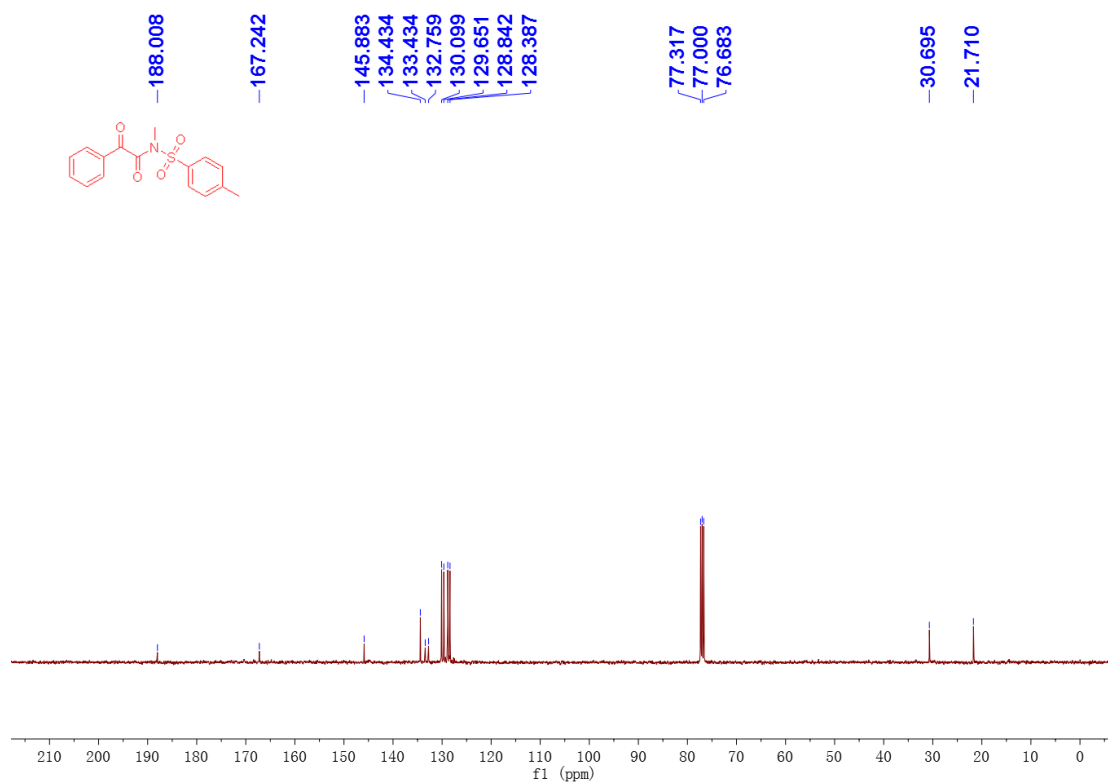

Figure S41.  $^{13}\text{C}$  NMR spectrum (101 MHz,  $\text{CDCl}_3$ ) of *N*-methyl-2-oxo-2-phenyl-*N*-tosylacetamide (**2a**)

*N*-Methyl-2-oxo-2-phenyl-*N*-(phenylsulfonyl)acetamide (**2b**)

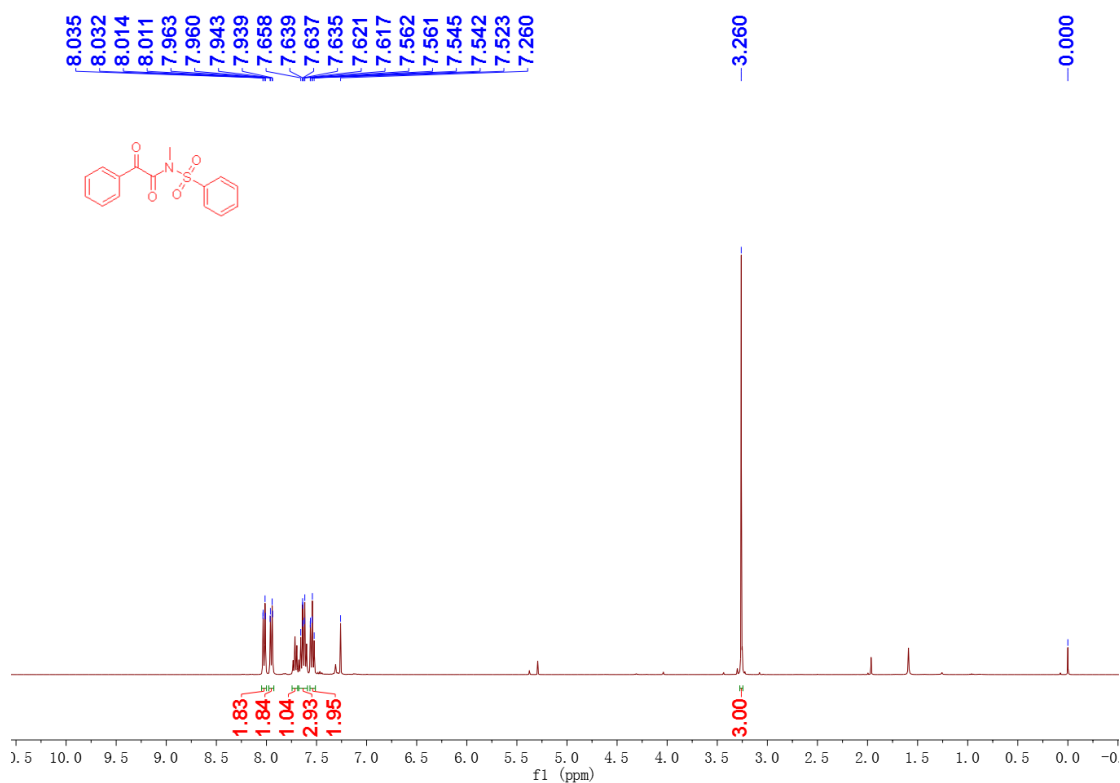

Figure S42. <sup>1</sup>H NMR spectrum (400 MHz, CDCl<sub>3</sub>) of *N*-methyl-2-oxo-2-phenyl-*N*-(phenylsulfonyl)acetamide (**2b**)

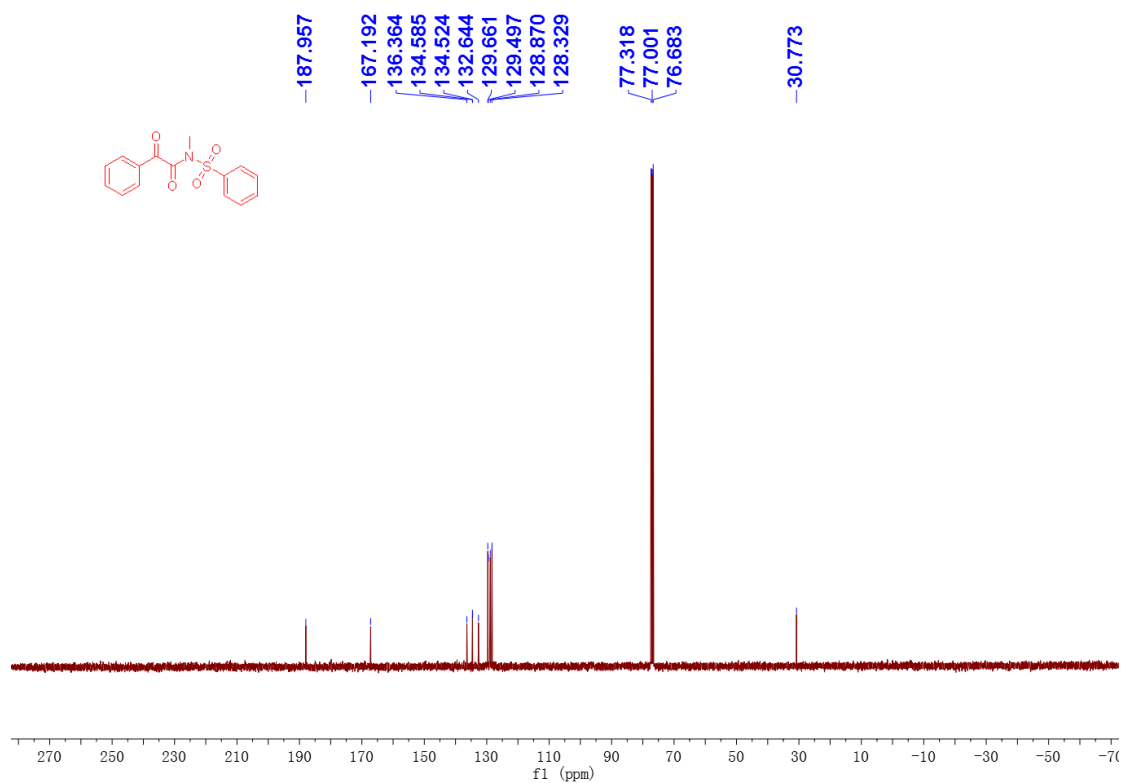

Figure S43. <sup>13</sup>C NMR spectrum (101 MHz, CDCl<sub>3</sub>) of *N*-methyl-2-oxo-2-phenyl-*N*-(phenylsulfonyl)acetamide (**2b**)

*N*-((4-Bromophenyl)sulfonyl)-*N*-methyl-2-oxo-2-phenylacetamide (**2c**)

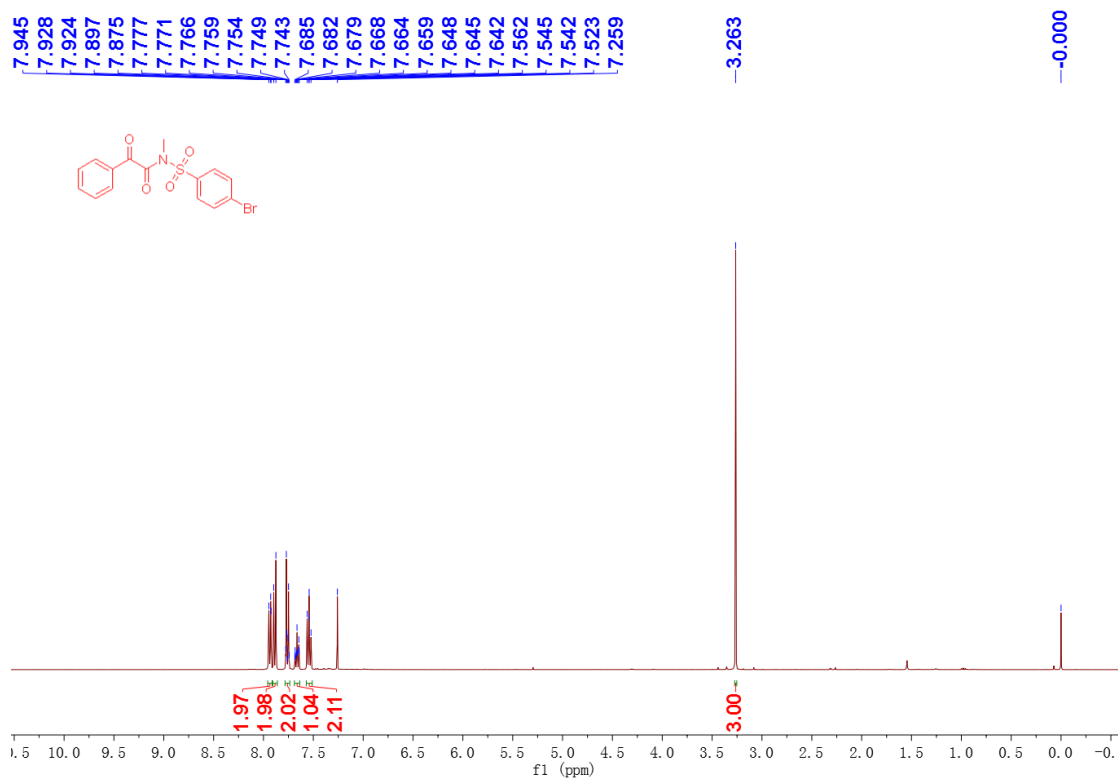

Figure S44. <sup>1</sup>H NMR spectrum (400 MHz, CDCl<sub>3</sub>) of *N*-((4-bromophenyl)sulfonyl)-*N*-methyl-2-oxo-2-phenylacetamide (**2c**)

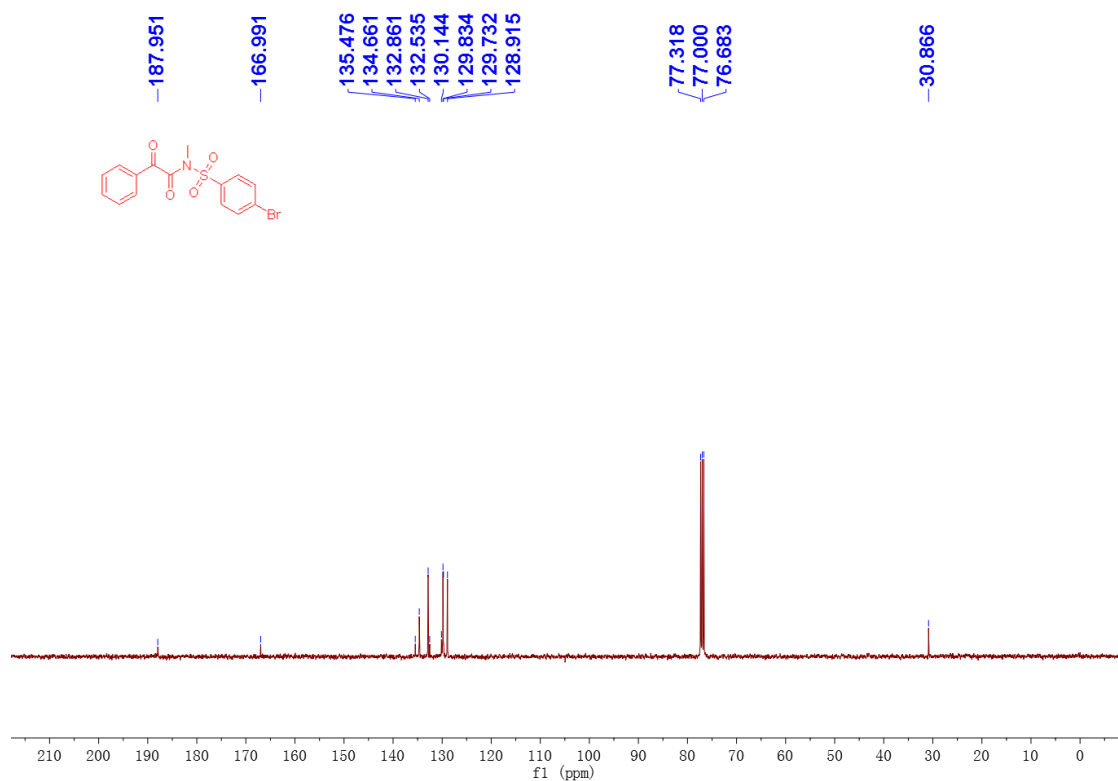

Figure S45. <sup>13</sup>C NMR spectrum (101 MHz, CDCl<sub>3</sub>) of *N*-((4-bromophenyl)sulfonyl)-*N*-methyl-2-oxo-2-phenylacetamide (**2c**)

*N*-Methyl-*N*-((4-nitrophenyl)sulfonyl)-2-oxo-2-phenylacetamide (**2d**)

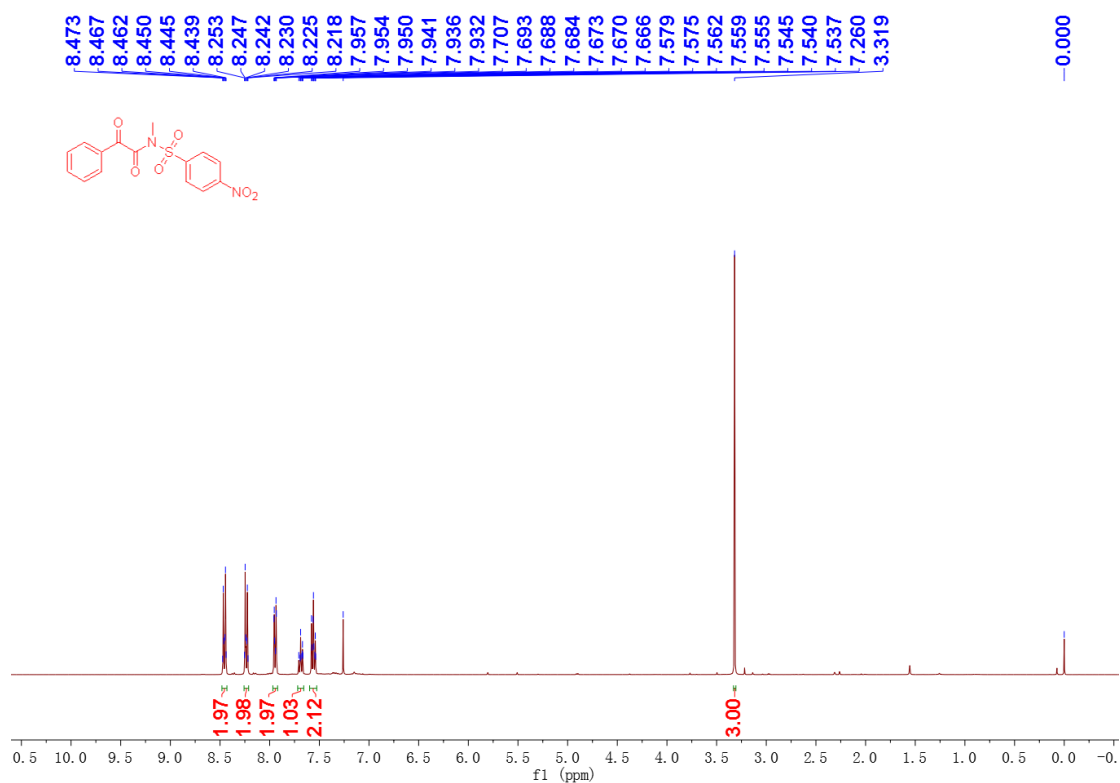

Figure S46. <sup>1</sup>H NMR spectrum (400 MHz, CDCl<sub>3</sub>) of *N*-methyl-*N*-((4-nitrophenyl)sulfonyl)-2-oxo-2-phenylacetamide (**2d**)

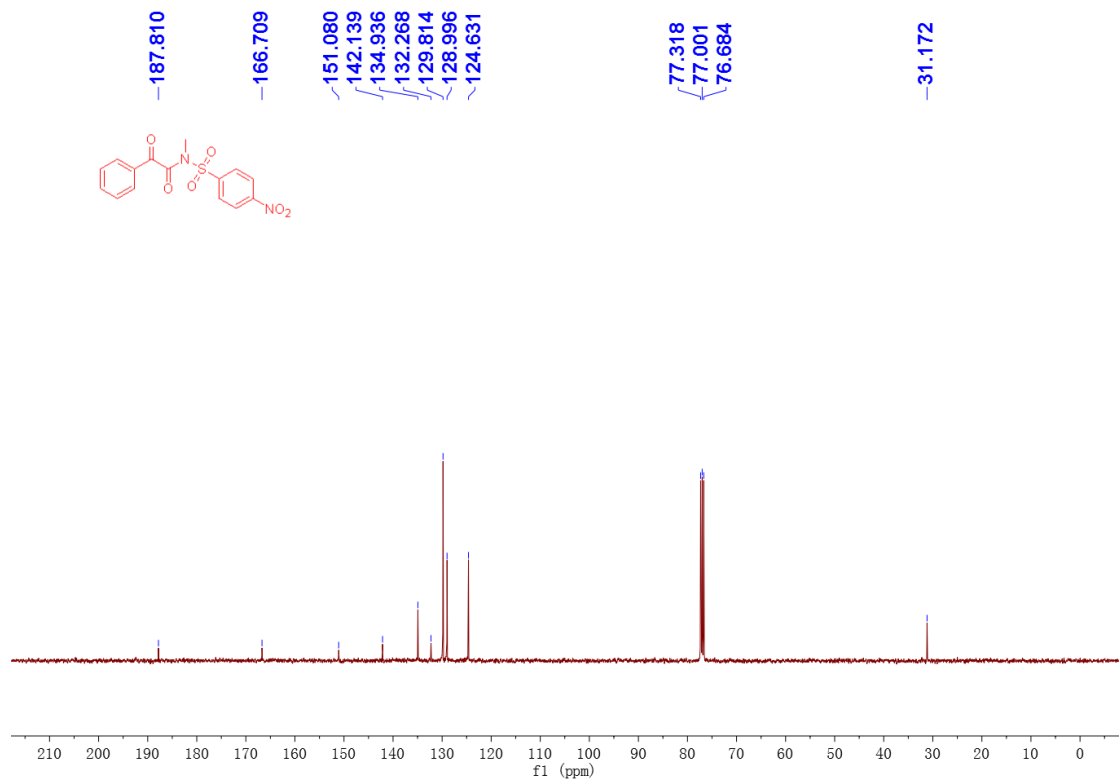

Figure S47. <sup>13</sup>C NMR spectrum (101 MHz, CDCl<sub>3</sub>) of *N*-methyl-*N*-((4-nitrophenyl)sulfonyl)-2-oxo-2-phenylacetamide (**2d**)

*N*-Methyl-2-oxo-2-(*p*-tolyl)-*N*-(*p*-tosyl)acetamide (**2e**)

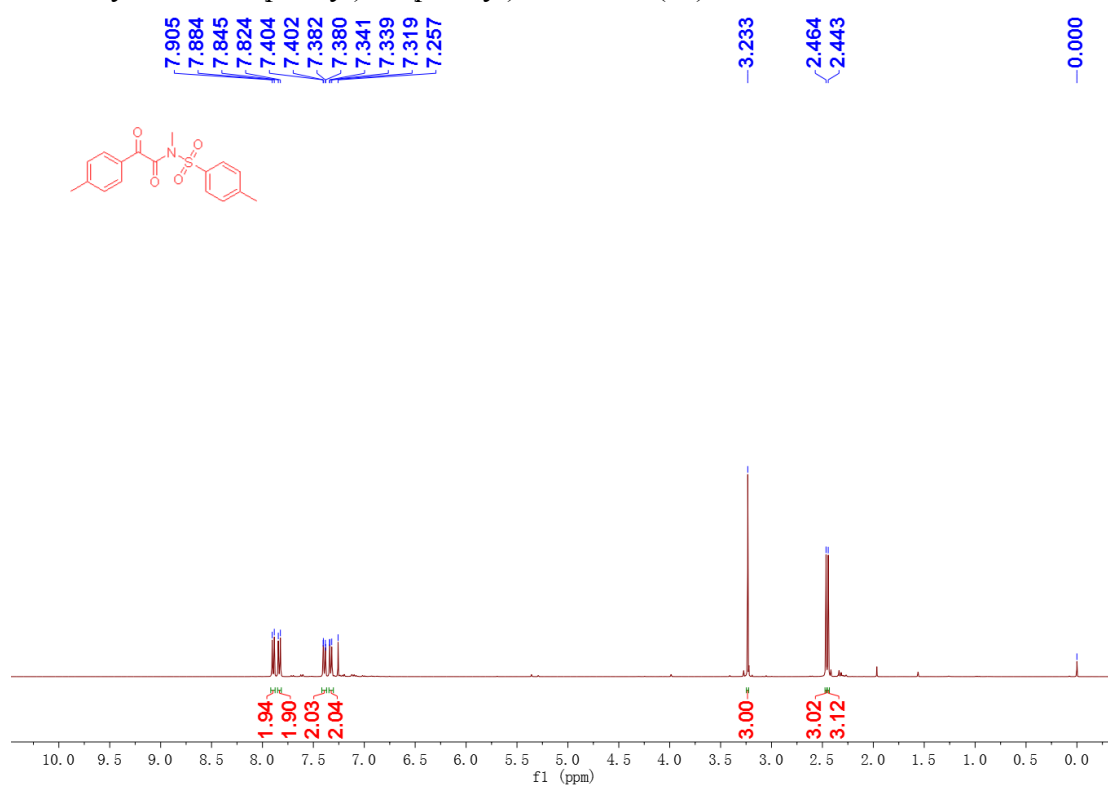

Figure S48. <sup>1</sup>H NMR spectrum (400 MHz, CDCl<sub>3</sub>) of *N*-methyl-2-oxo-2-(*p*-tolyl)-*N*-(*p*-tosyl)acetamide (**2e**)

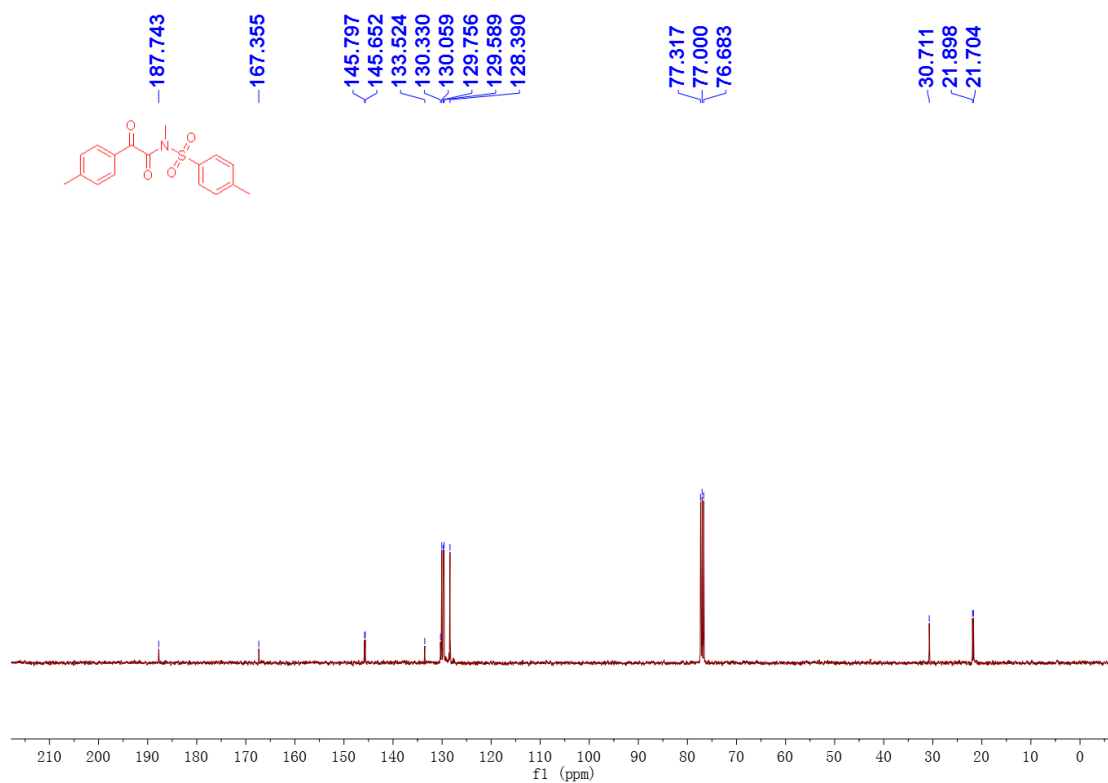

Figure S49. <sup>13</sup>C NMR spectrum (101 MHz, CDCl<sub>3</sub>) of *N*-methyl-2-oxo-2-(*p*-tolyl)-*N*-(*p*-tosyl)acetamide (**2e**)

2-(4-Fluorophenyl)-*N*-methyl-2-oxo-*N*-tosylacetamide (**2f**)

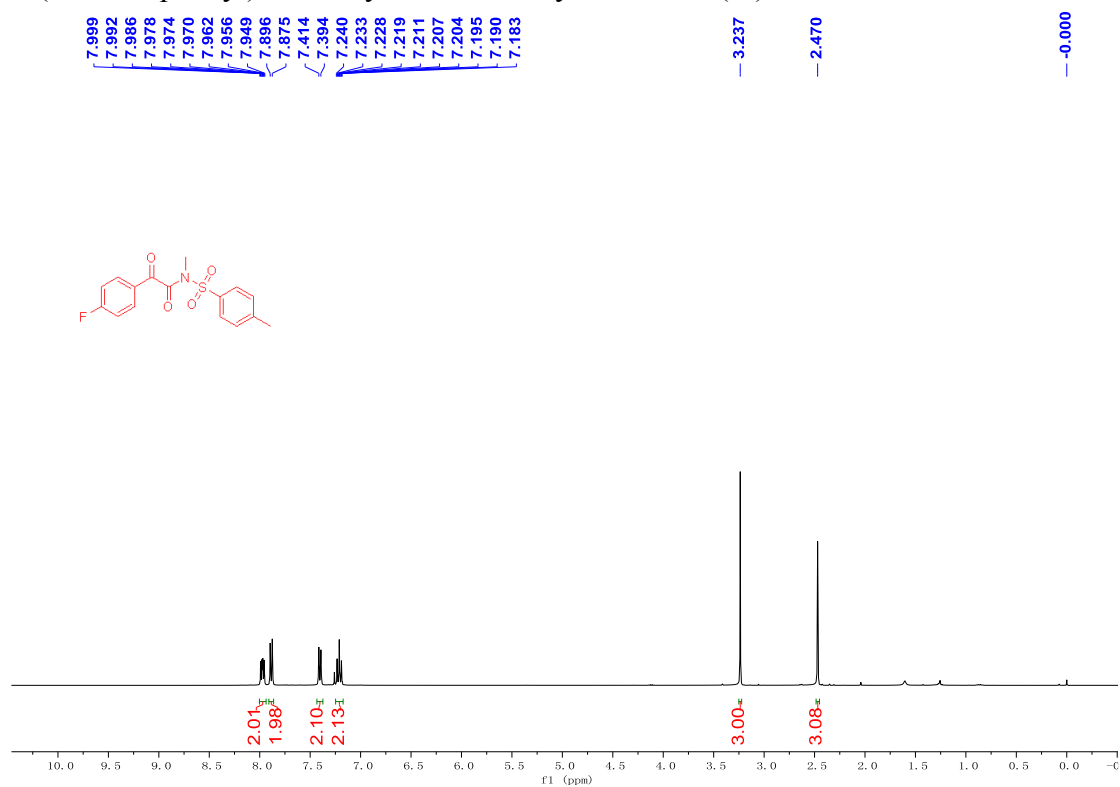

Figure S50. <sup>1</sup>H NMR spectrum (400 MHz, CDCl<sub>3</sub>) of 2-(4-fluorophenyl)-*N*-methyl-2-oxo-*N*-tosylacetamide (**2f**)

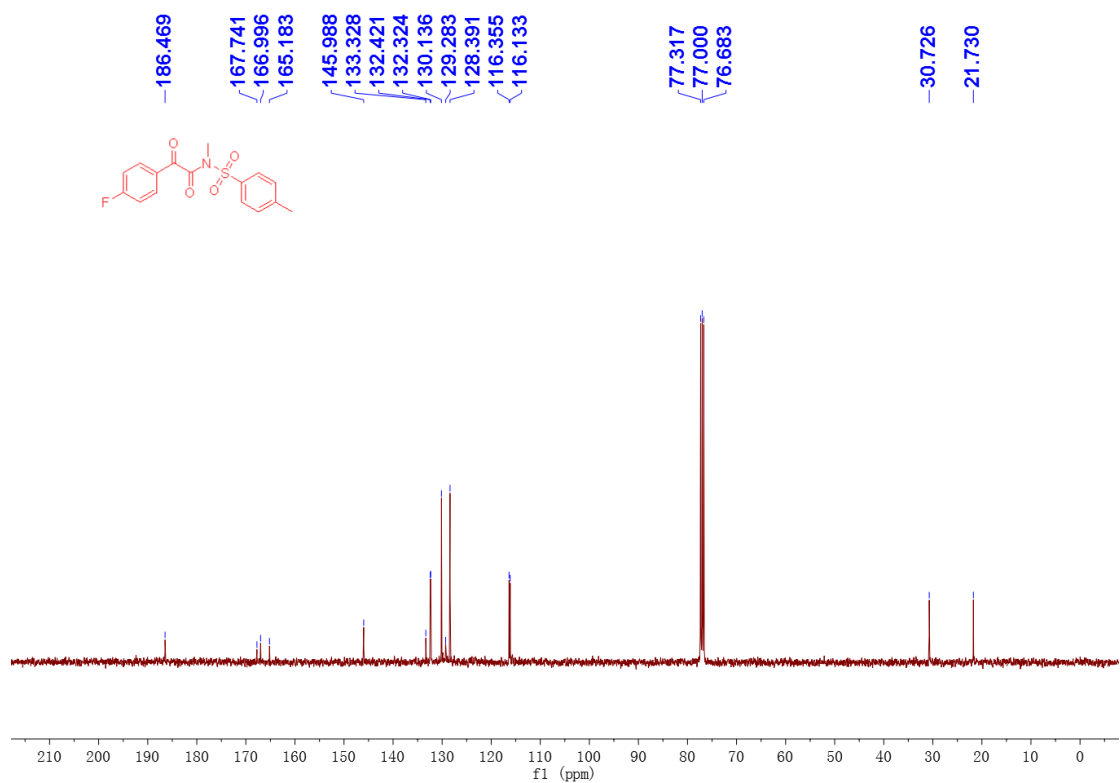

Figure S51. <sup>13</sup>C NMR spectrum (101 MHz, CDCl<sub>3</sub>) of 2-(4-fluorophenyl)-*N*-methyl-2-oxo-*N*-tosylacetamide (**2f**)



$^{19}\text{F}$  NMR (377 MHz,  $\text{CDCl}_3$ )

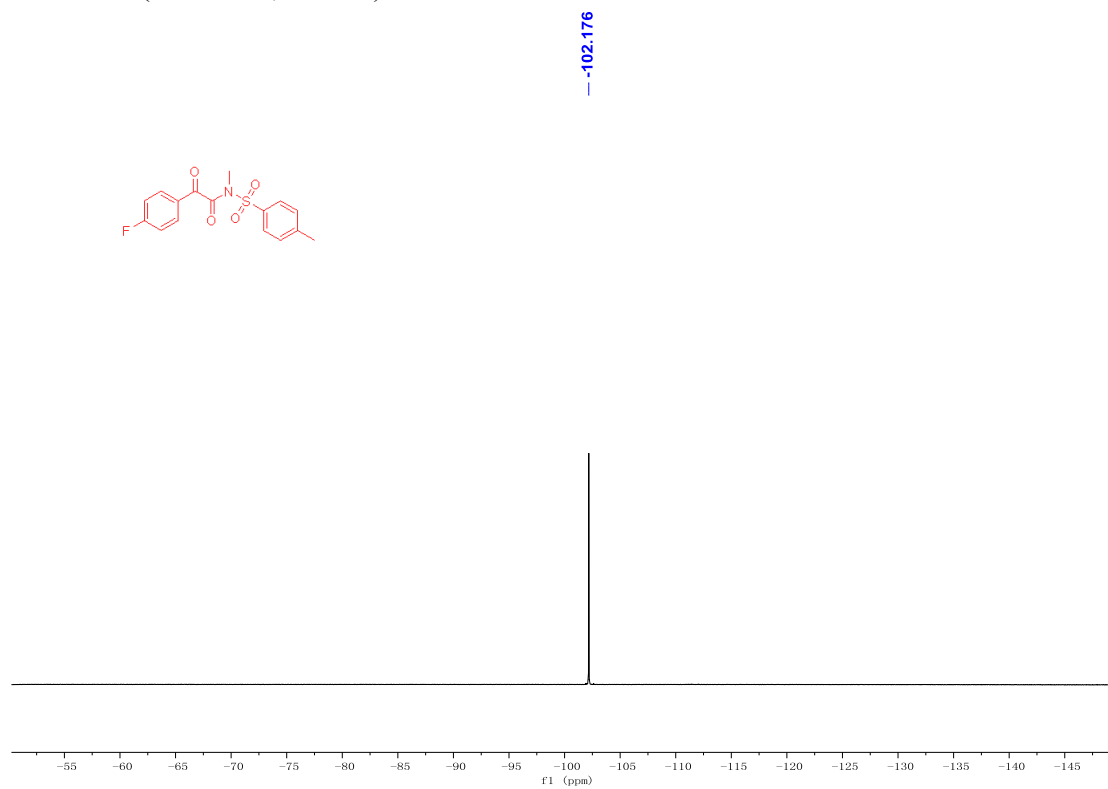

Figure S52.  $^{19}\text{F}$  NMR spectrum (377 MHz,  $\text{CDCl}_3$ ) of 2-(4-fluorophenyl)-*N*-methyl-2-oxo-*N*-tosylacetamide (**2f**)

2-(4-Chlorophenyl)-*N*-methyl-2-oxo-*N*-tosylacetamide (**2g**)

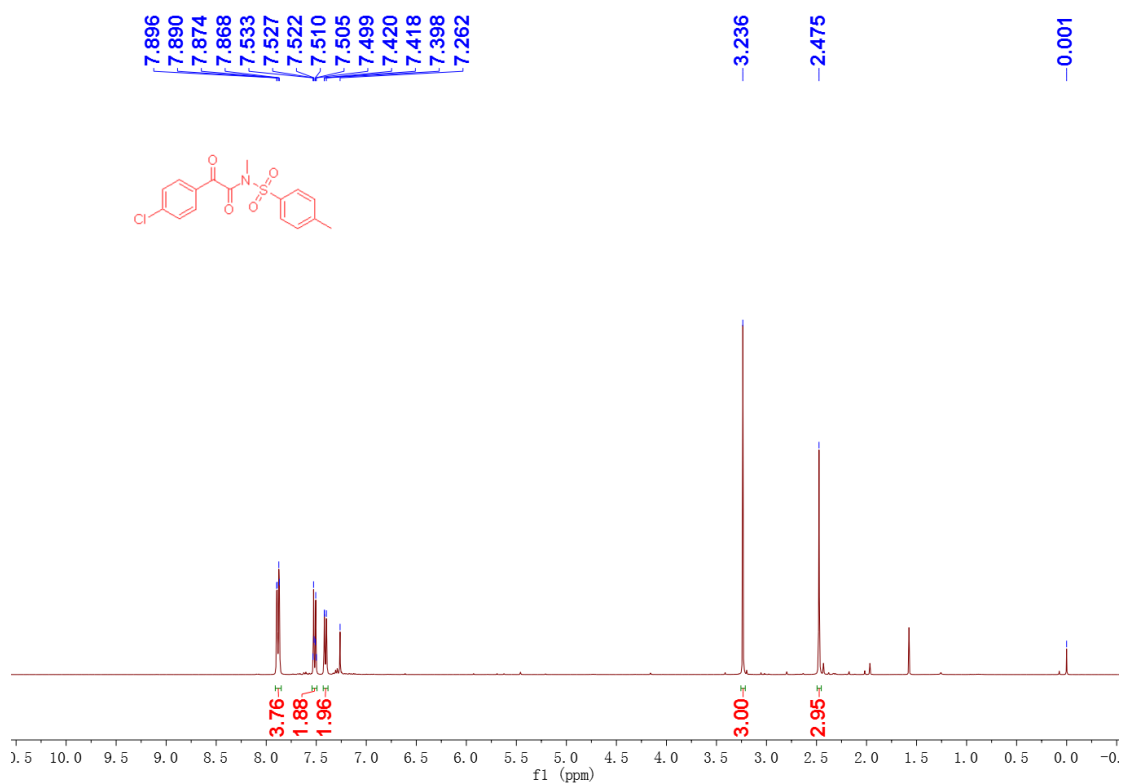

Figure S53. <sup>1</sup>H NMR spectrum (400 MHz, CDCl<sub>3</sub>) of 2-(4-chlorophenyl)-*N*-methyl-2-oxo-*N*-tosylacetamide (**2g**)

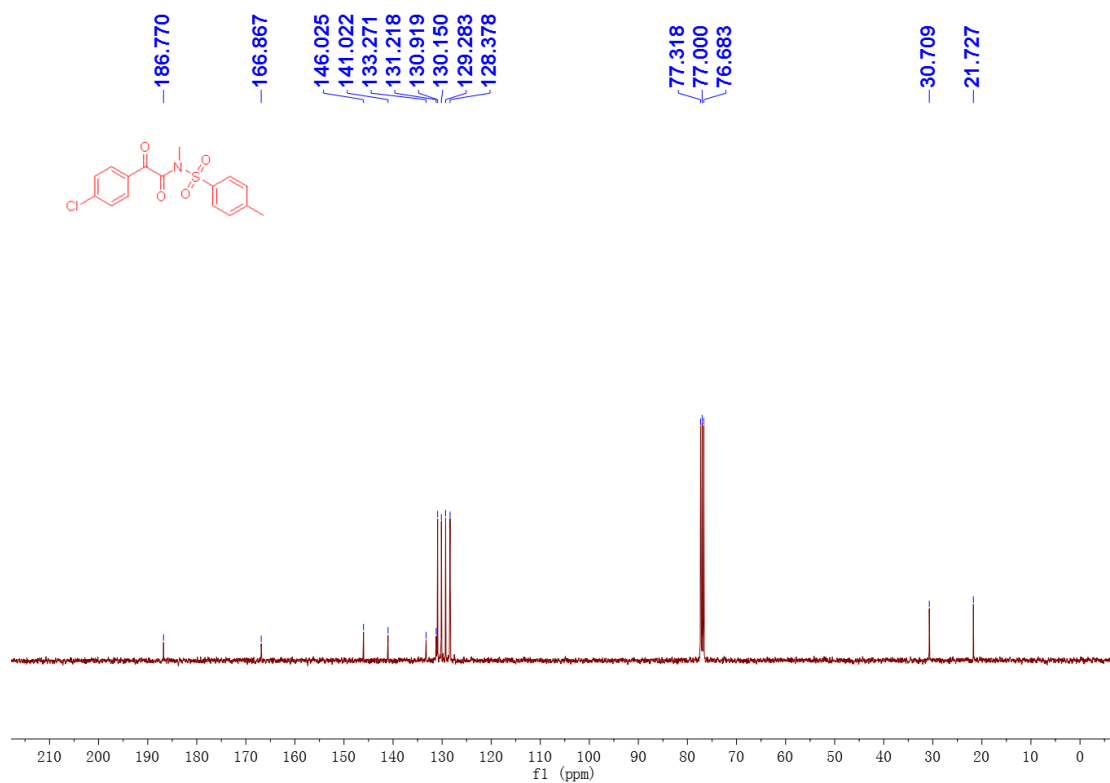

Figure S54. <sup>13</sup>C NMR spectrum (101 MHz, CDCl<sub>3</sub>) of 2-(4-chlorophenyl)-*N*-methyl-2-oxo-*N*-tosylacetamide (**2g**)

2-(4-Bromophenyl)-*N*-methyl-2-oxo-*N*-tosylacetamide (**2h**)

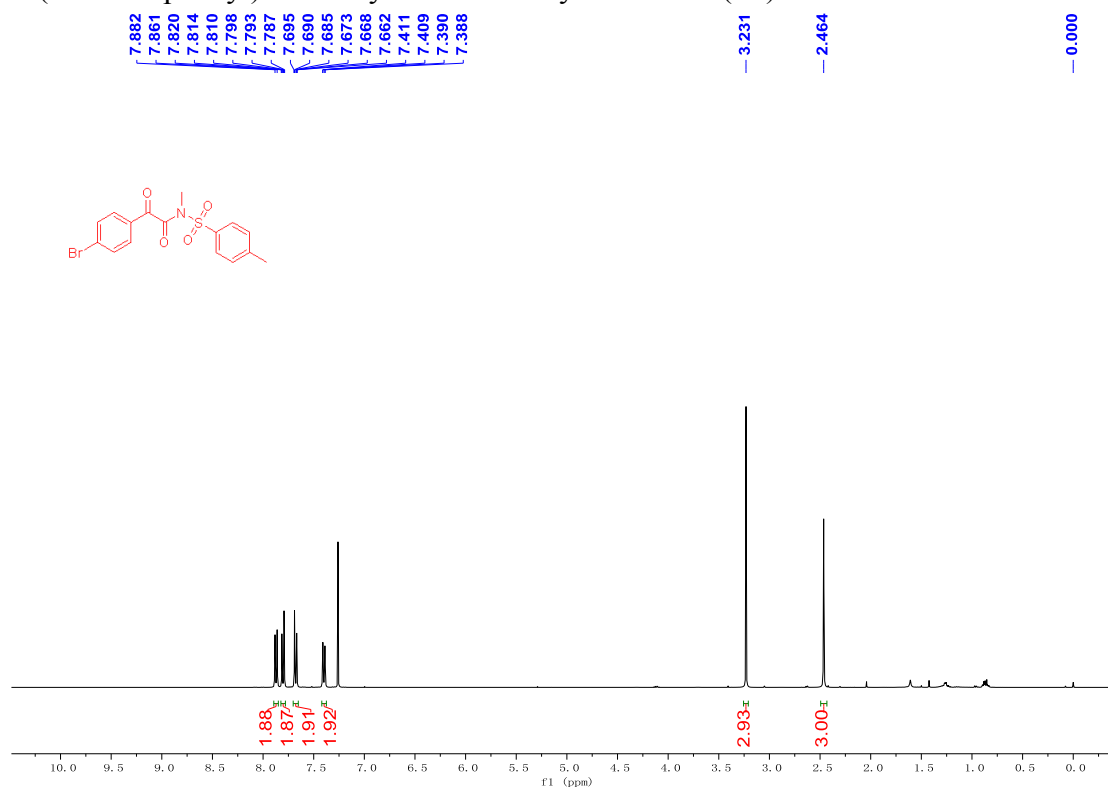

Figure S55. <sup>1</sup>H NMR spectrum (400 MHz, CDCl<sub>3</sub>) of 2-(4-bromophenyl)-*N*-methyl-2-oxo-*N*-tosylacetamide (**2h**)

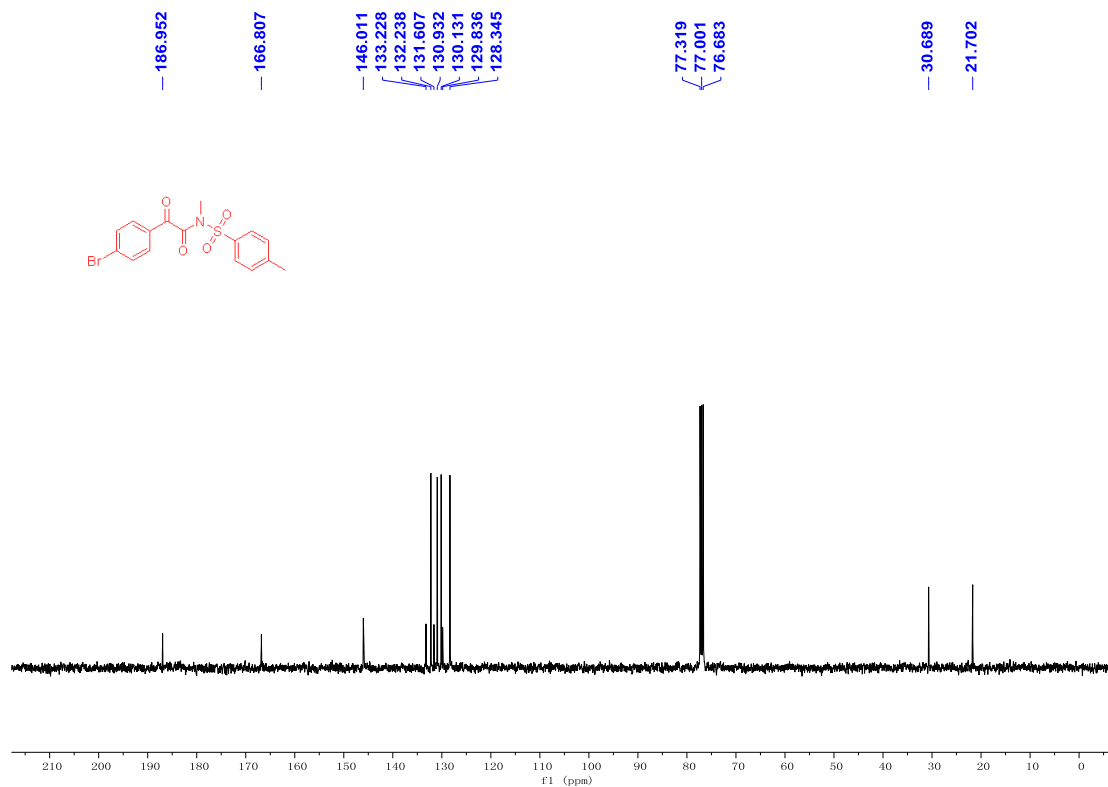

Figure S56. <sup>13</sup>C NMR spectrum (101 MHz, CDCl<sub>3</sub>) of 2-(4-bromophenyl)-*N*-methyl-2-oxo-*N*-tosylacetamide (**2h**)

*N*-Methyl-2-oxo-2-(thiophen-3-yl)-*N*-tosylacetamide (**2i**)

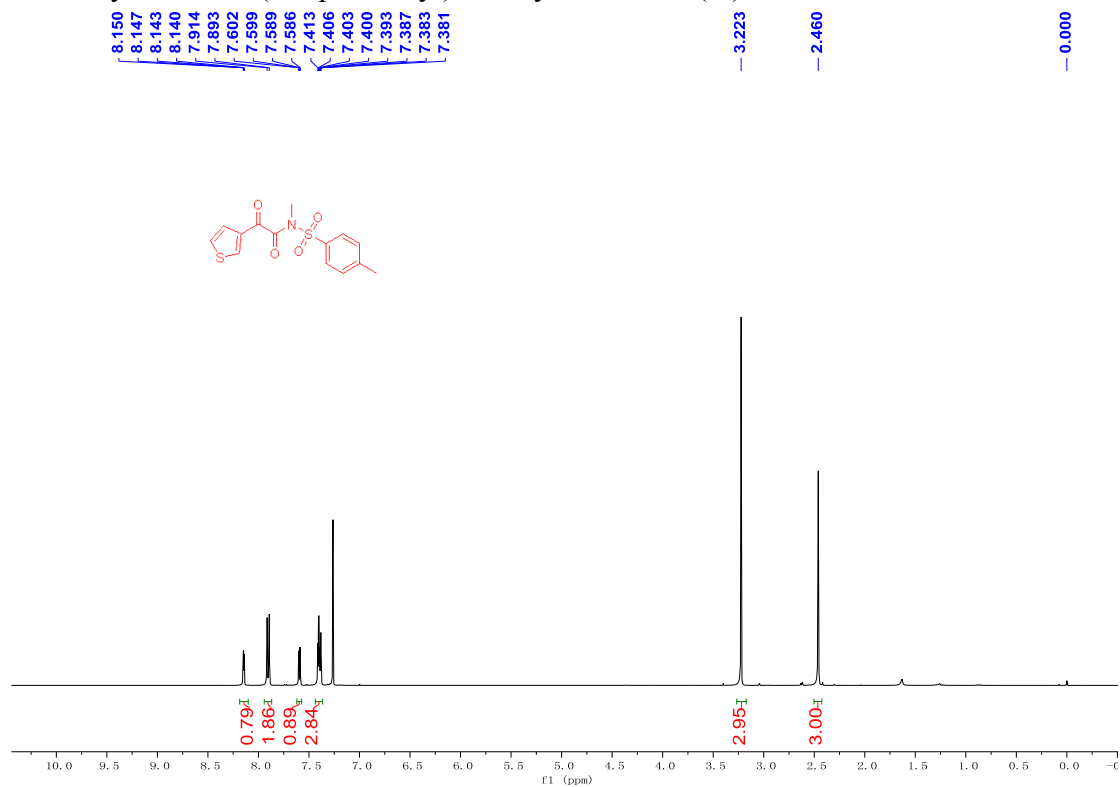

Figure S57. <sup>1</sup>H NMR spectrum (400 MHz, CDCl<sub>3</sub>) of *N*-methyl-2-oxo-2-(thiophen-3-yl)-*N*-tosylacetamide (**2i**)

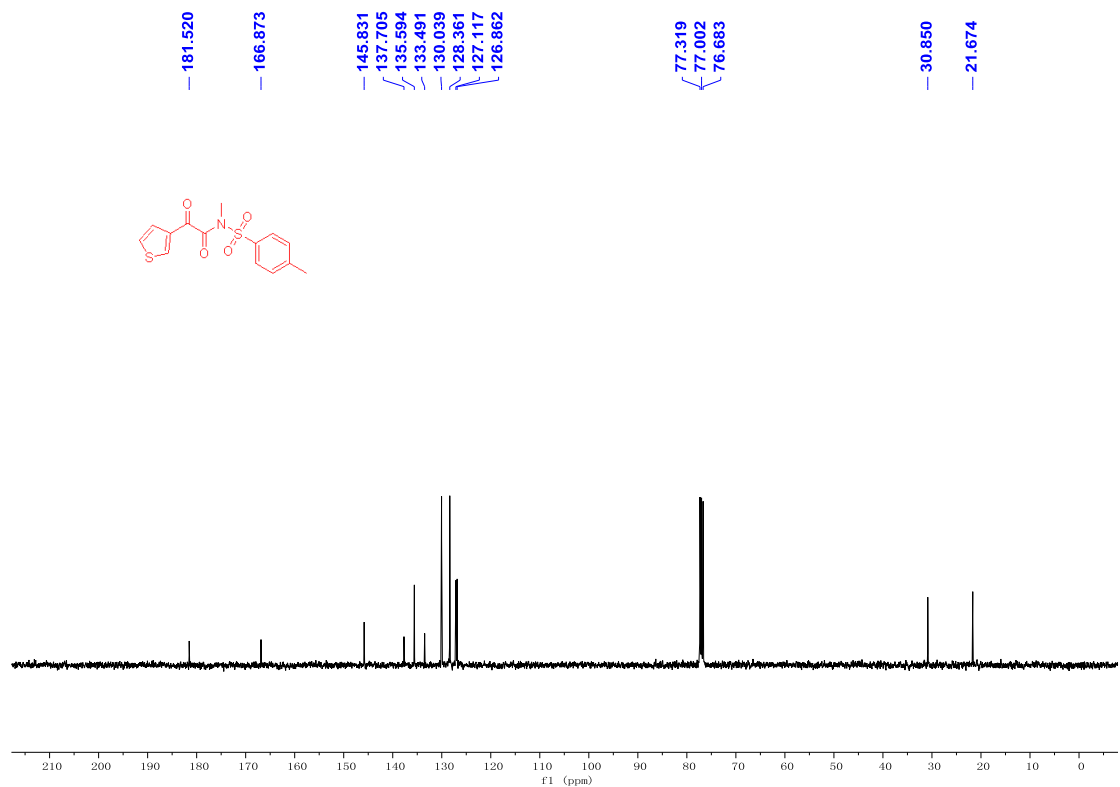

Figure S58. <sup>13</sup>C NMR spectrum (101 MHz, CDCl<sub>3</sub>) of *N*-methyl-2-oxo-2-(thiophen-3-yl)-*N*-tosylacetamide (**2i**)

*N*-Ethyl-2-oxo-2-phenyl-*N*-tosylacetamide (**2j**)

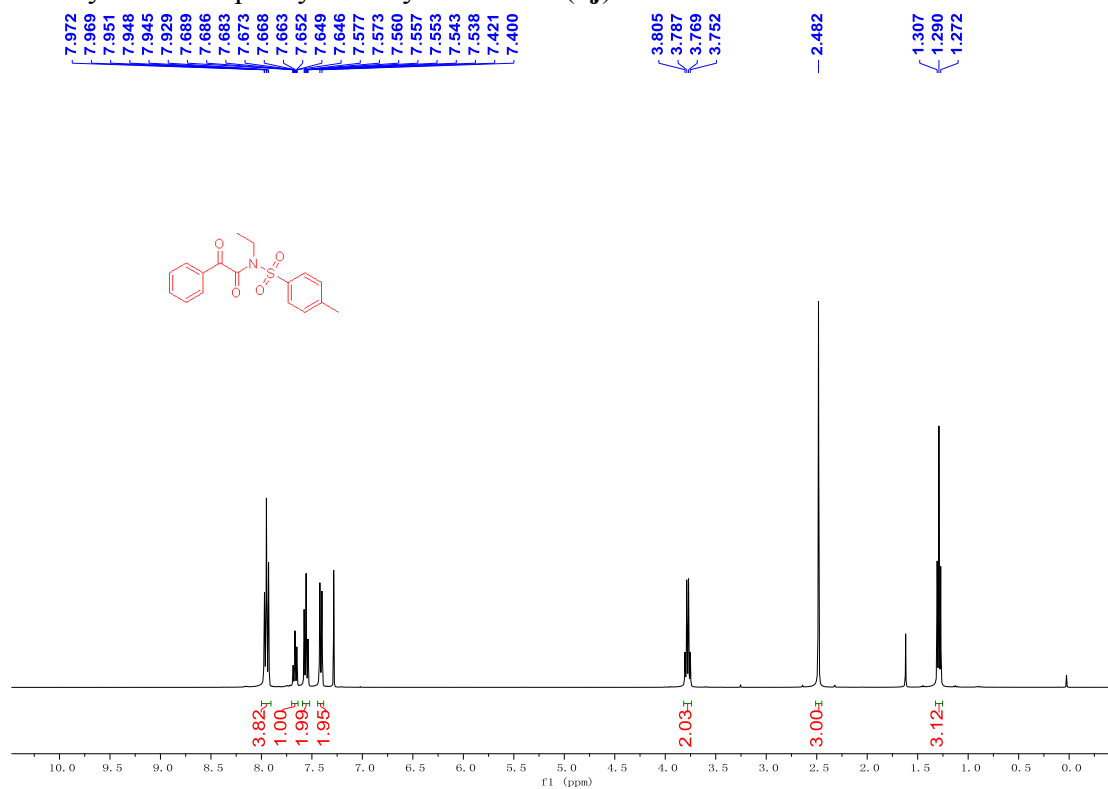

Figure S59. <sup>1</sup>H NMR spectrum (400 MHz, CDCl<sub>3</sub>) of *N*-ethyl-2-oxo-2-phenyl-*N*-tosylacetamide (**2j**)

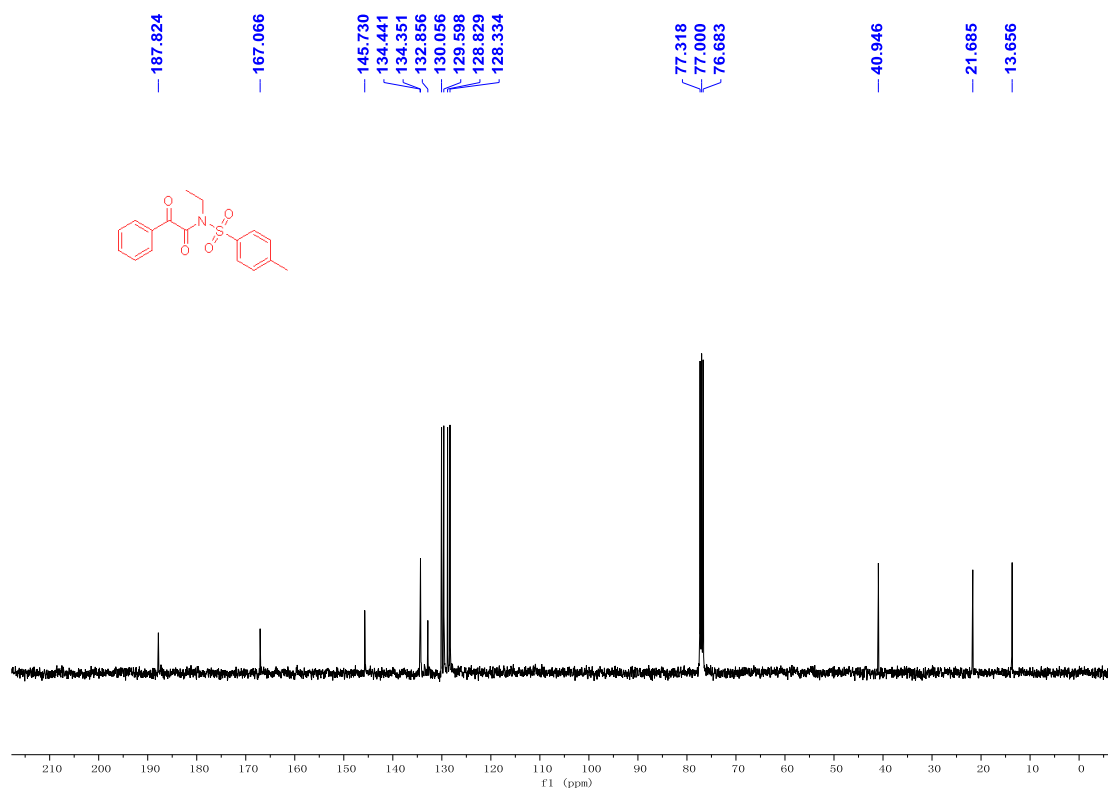

Figure S60. <sup>13</sup>C NMR spectrum (101 MHz, CDCl<sub>3</sub>) of *N*-ethyl-2-oxo-2-phenyl-*N*-tosylacetamide (**2j**)

*N*-Butyl-2-oxo-2-phenyl-*N*-tosylacetamide (**2k**)

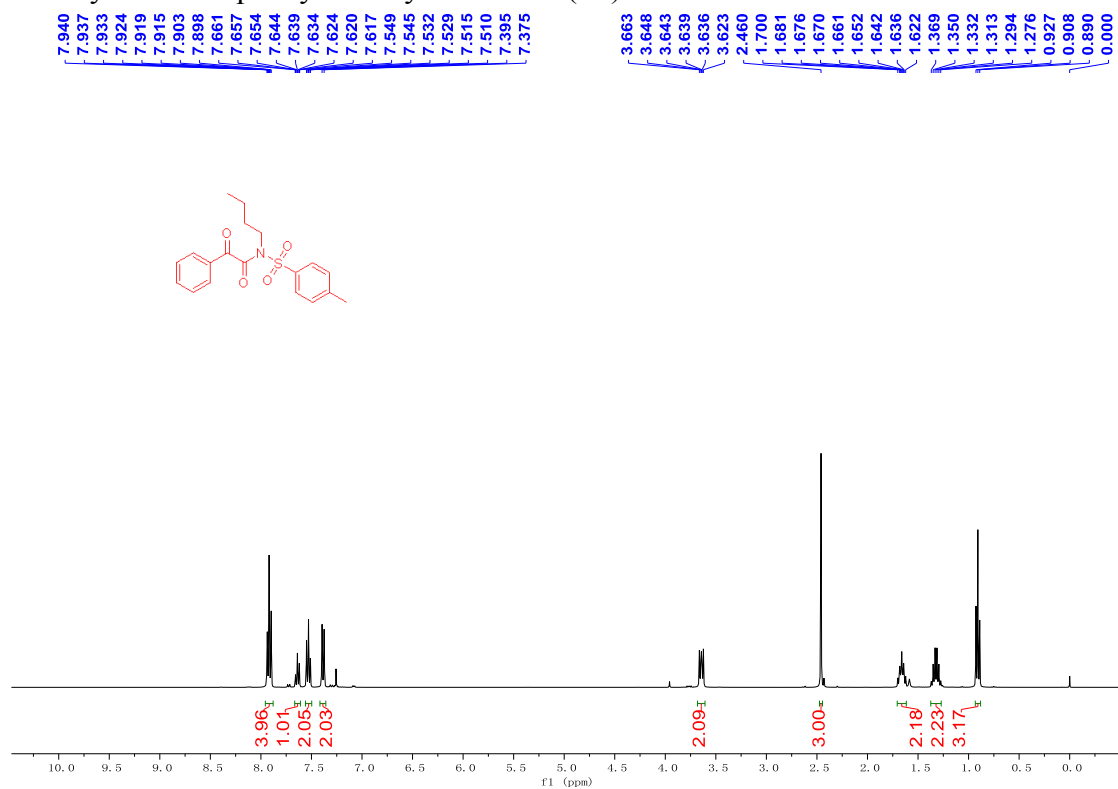

Figure S61. <sup>1</sup>H NMR spectrum (101 MHz, CDCl<sub>3</sub>) of *N*-butyl-2-oxo-2-phenyl-*N*-tosylacetamide (**2k**)

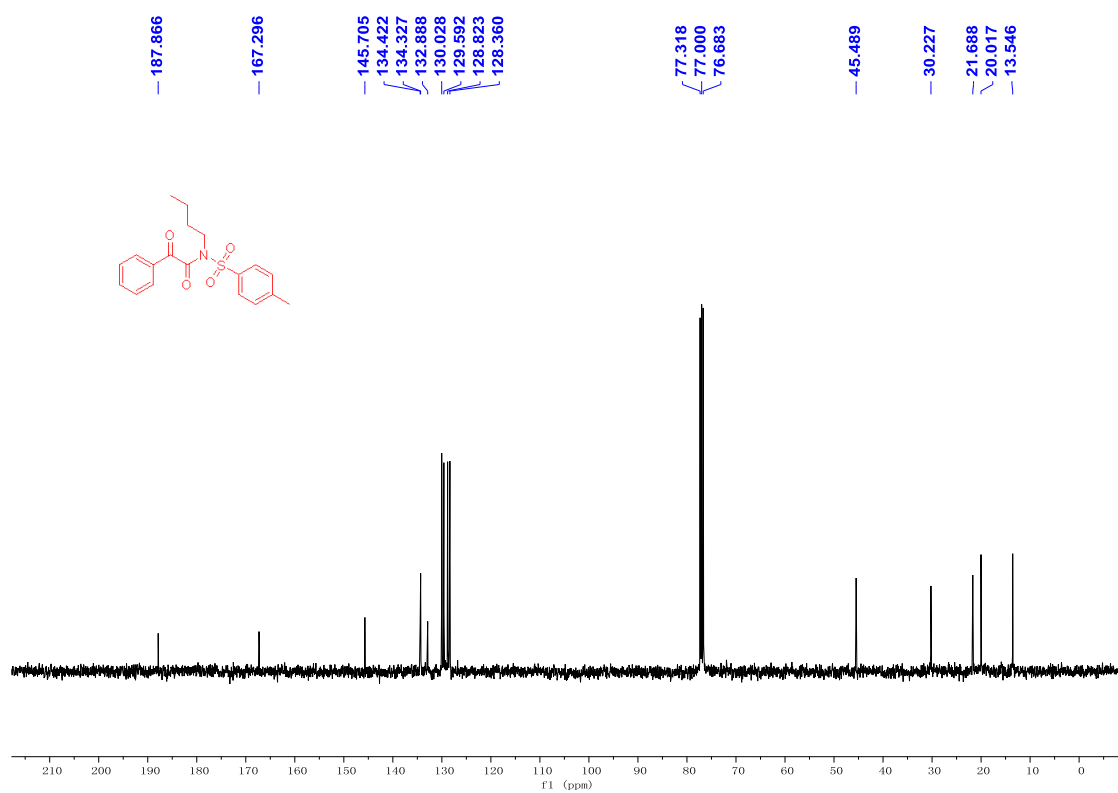

Figure S62. <sup>13</sup>C NMR spectrum (101 MHz, CDCl<sub>3</sub>) of *N*-butyl-2-oxo-2-phenyl-*N*-tosylacetamide (**2k**)

*N*-Cyclohexyl-2-oxo-2-phenyl-*N*-tosylacetamide (**21**)

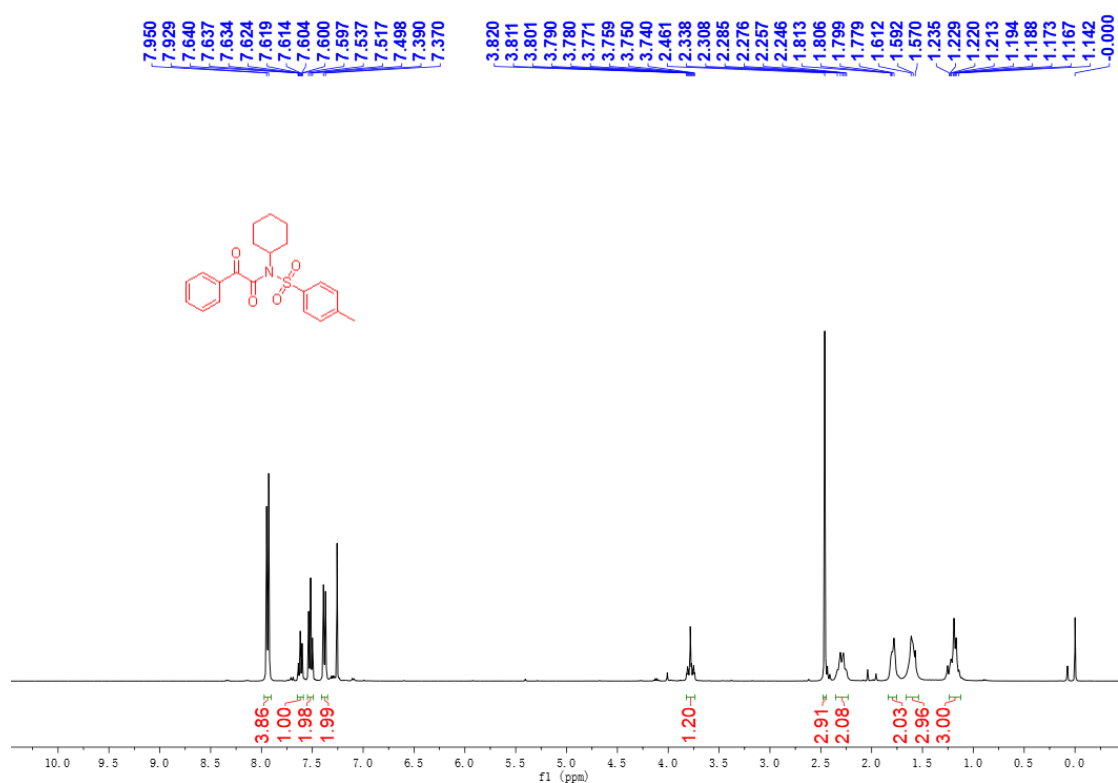

Figure S63. <sup>1</sup>H NMR spectrum (400 MHz, CDCl<sub>3</sub>) of *N*-cyclohexyl-2-oxo-2-phenyl-*N*-tosylacetamide (**21**)

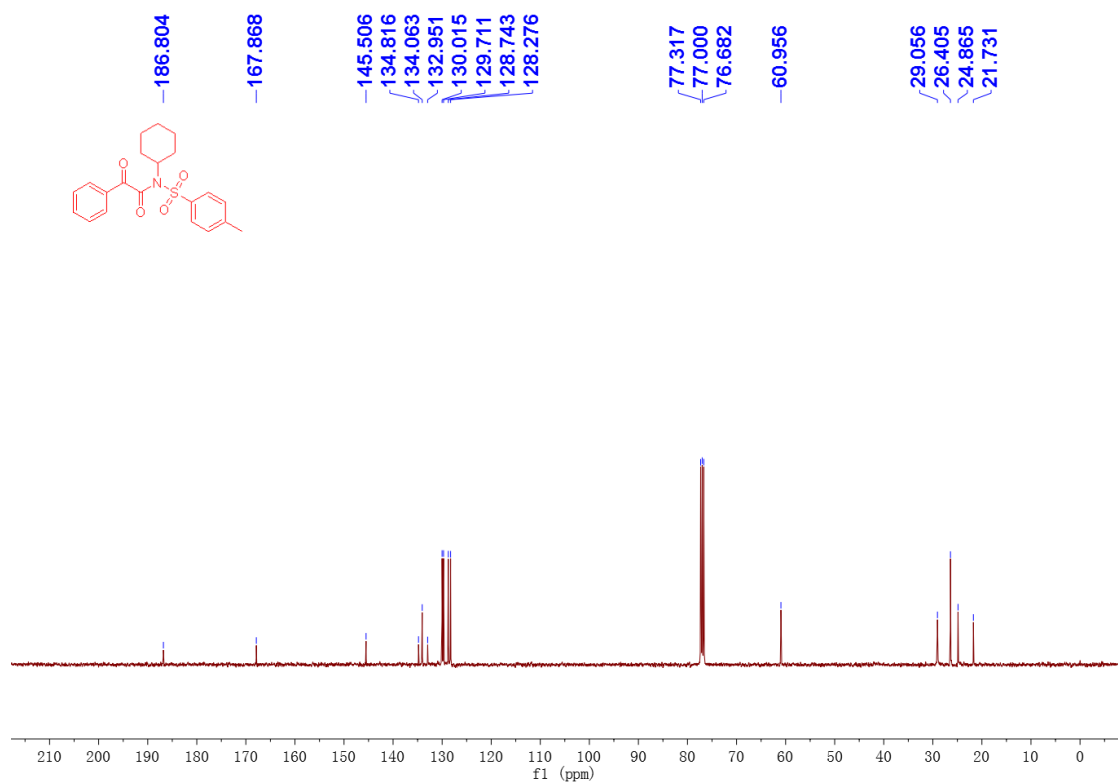

Figure S64. <sup>13</sup>C NMR spectrum (101 MHz, CDCl<sub>3</sub>) of *N*-cyclohexyl-2-oxo-2-phenyl-*N*-tosylacetamide (**21**)

*N*-Cyclopropyl-2-oxo-2-phenyl-*N*-tosylacetamide (**2m**)

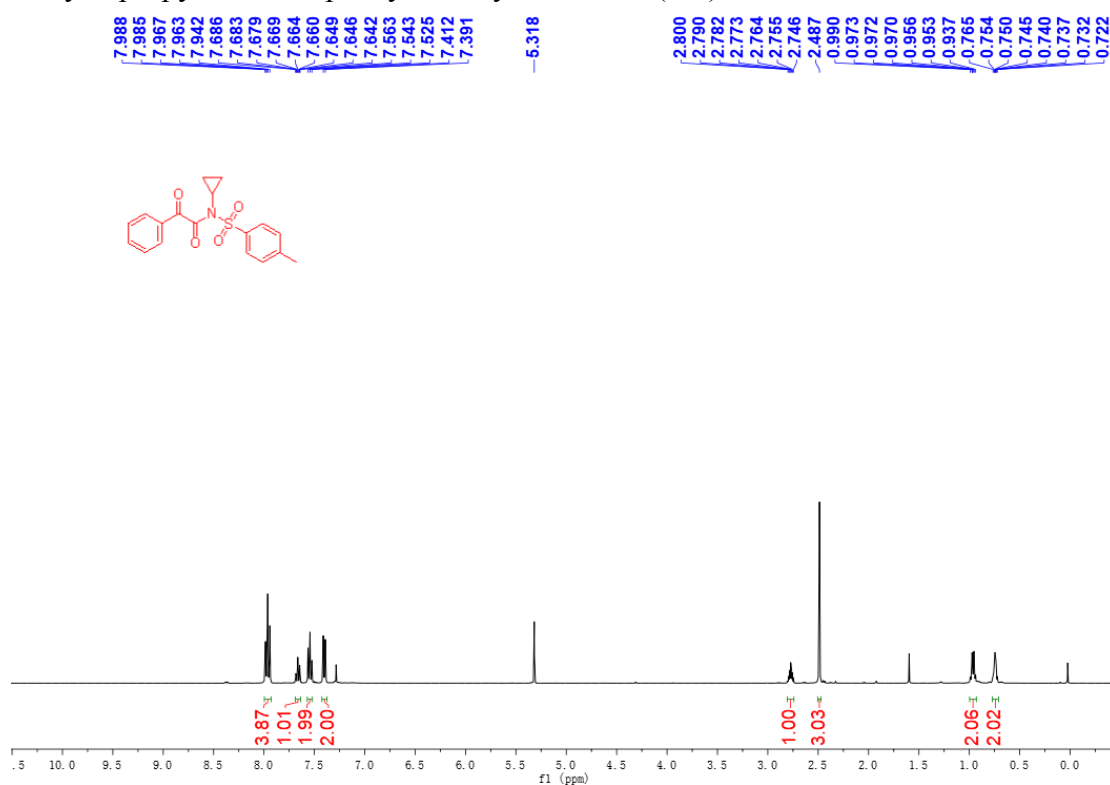

Figure S65. <sup>1</sup>H NMR spectrum (400 MHz, CDCl<sub>3</sub>) of *N*-cyclopropyl-2-oxo-2-phenyl-*N*-tosylacetamide (**2m**)

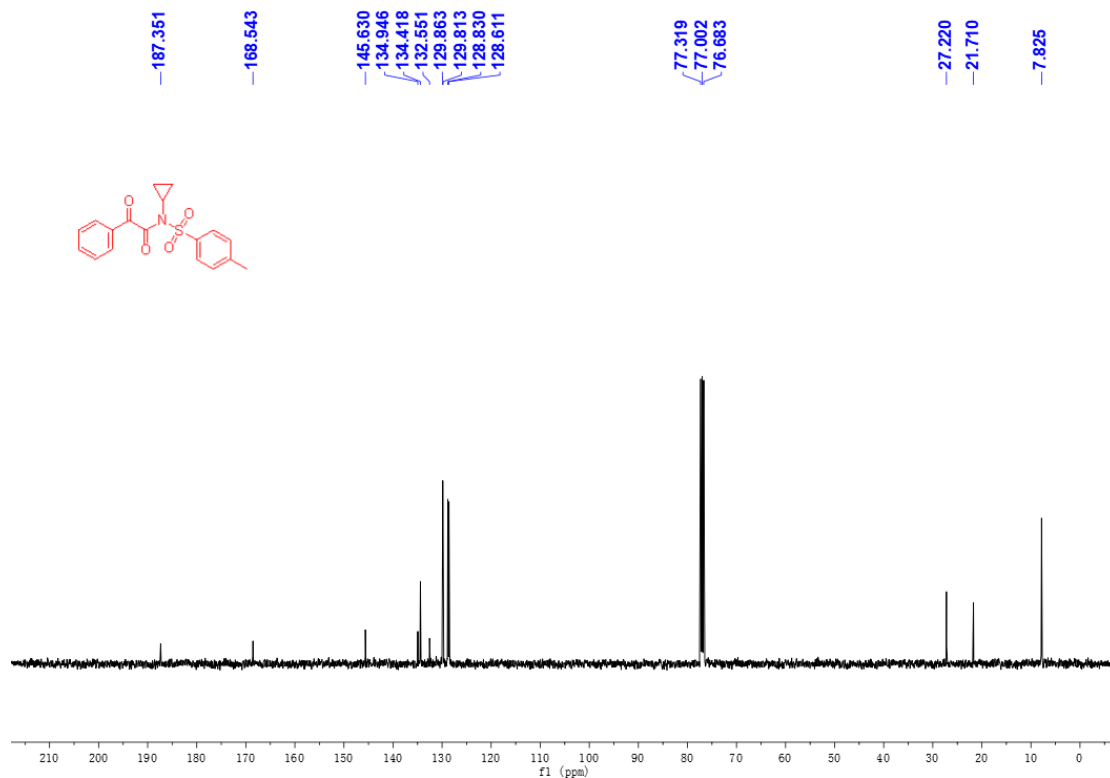

Figure S66. <sup>13</sup>C NMR spectrum (101 MHz, CDCl<sub>3</sub>) of *N*-cyclopropyl-2-oxo-2-phenyl-*N*-tosylacetamide (**2m**)



*N*-Benzyl-2-oxo-2-phenyl-*N*-tosylacetamide (**2n**)

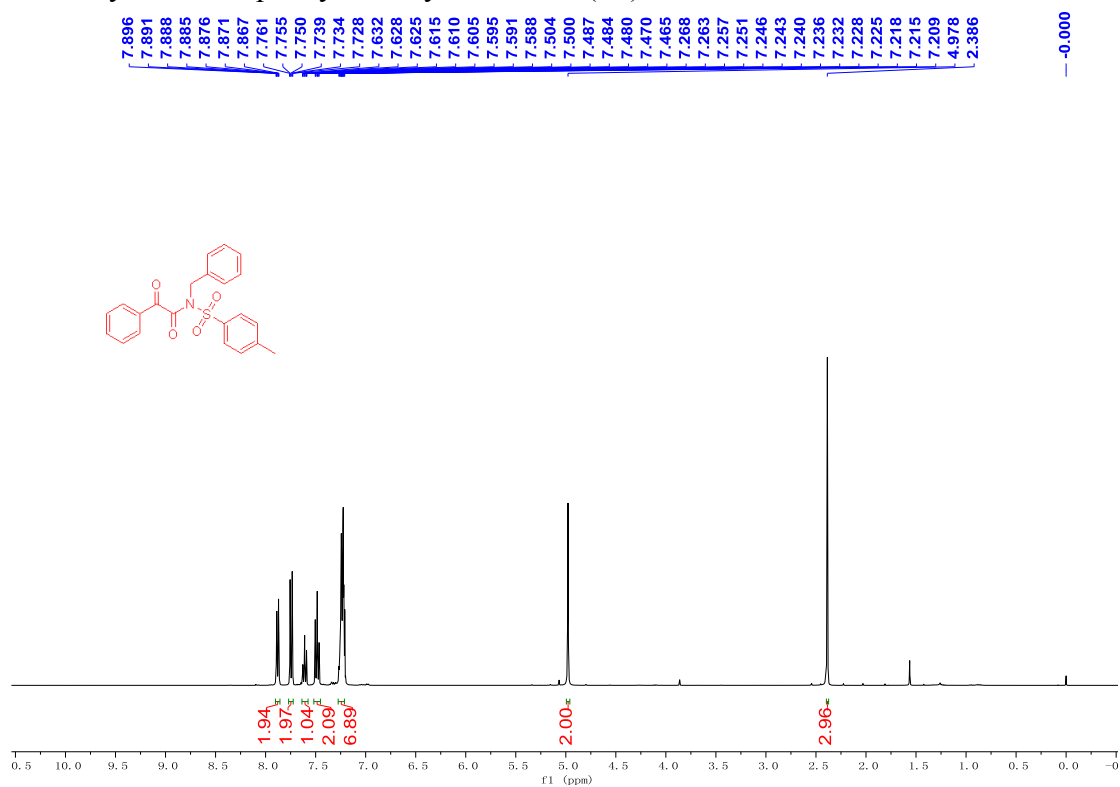

Figure S67. <sup>1</sup>H NMR spectrum (400 MHz, CDCl<sub>3</sub>) of *N*-benzyl-2-oxo-2-phenyl-*N*-tosylacetamide (**2n**)

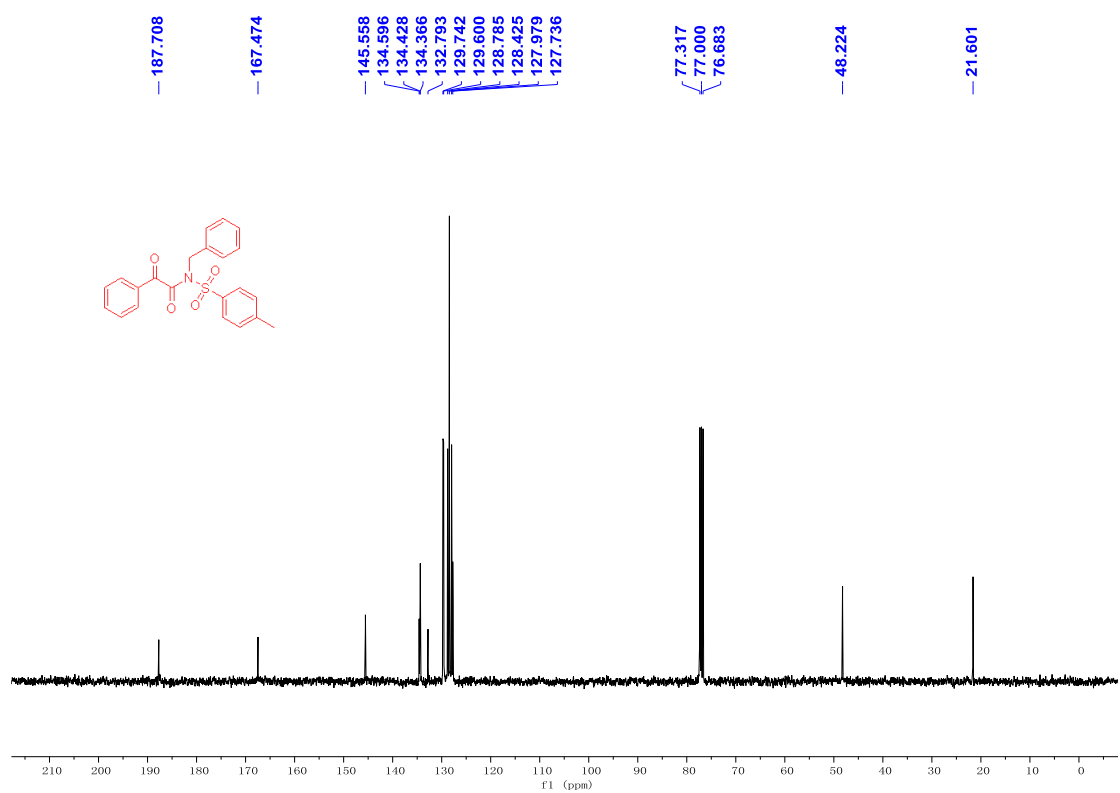

Figure S68. <sup>13</sup>C NMR spectrum (101 MHz, CDCl<sub>3</sub>) of *N*-benzyl-2-oxo-2-phenyl-*N*-tosylacetamide (**2n**)

2-Oxo-*N*,2-diphenyl-*N*-tosylacetamide (**2o**)

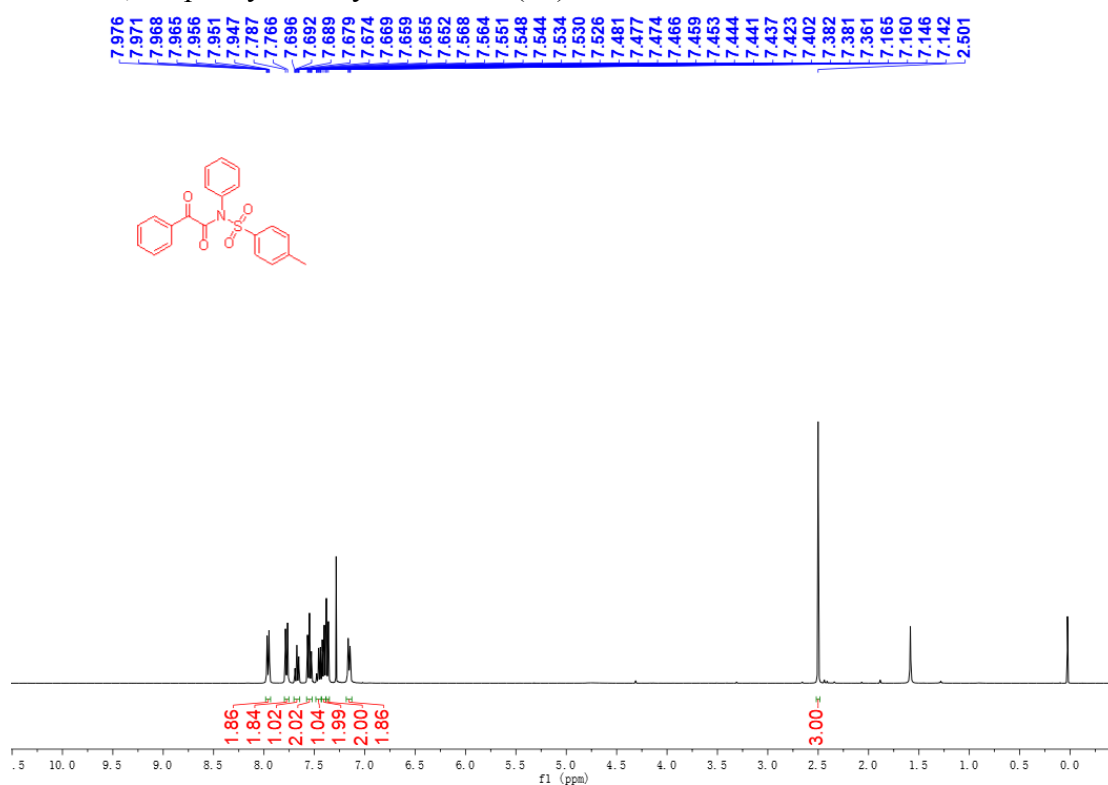

Figure S69. <sup>1</sup>H NMR spectrum (400 MHz, CDCl<sub>3</sub>) of 2-oxo-*N*,2-diphenyl-*N*-tosylacetamide (**2o**)

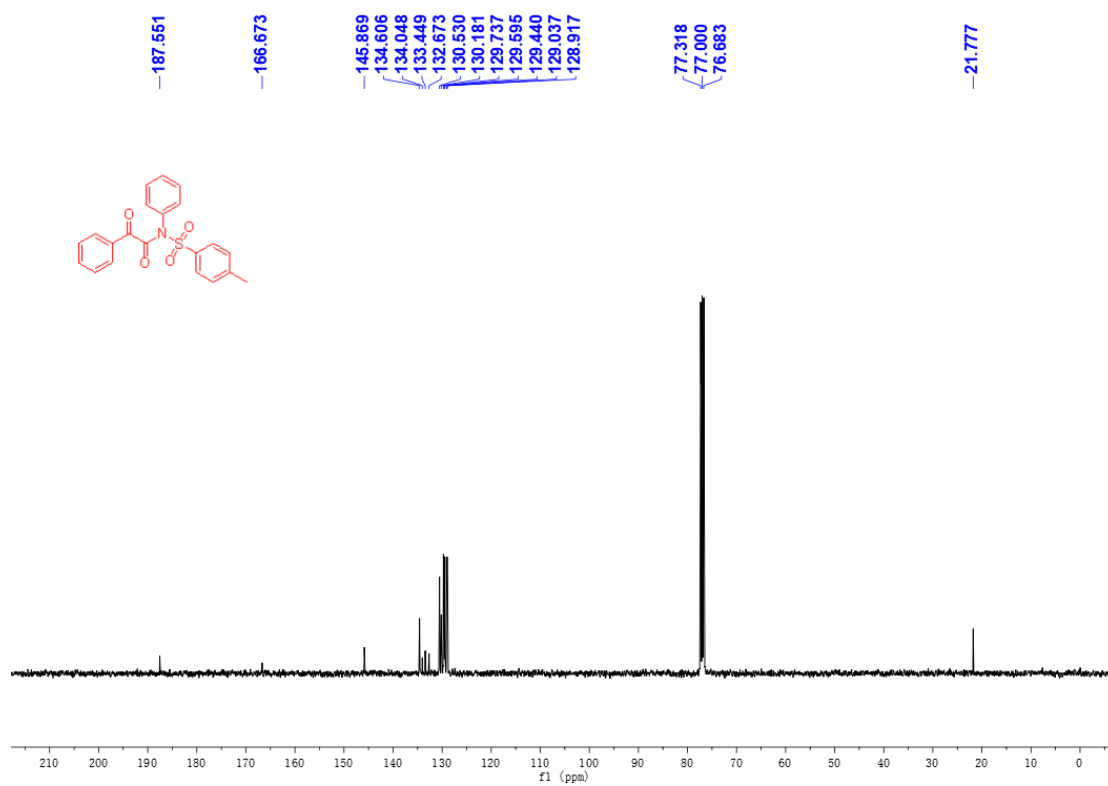

Figure S70. <sup>13</sup>C NMR spectrum (101 MHz, CDCl<sub>3</sub>) of 2-oxo-*N*,2-diphenyl-*N*-tosylacetamide (**2o**)

*N*-(4-Methoxyphenyl)-2-oxo-2-phenyl-*N*-tosylacetamide (**2p**)

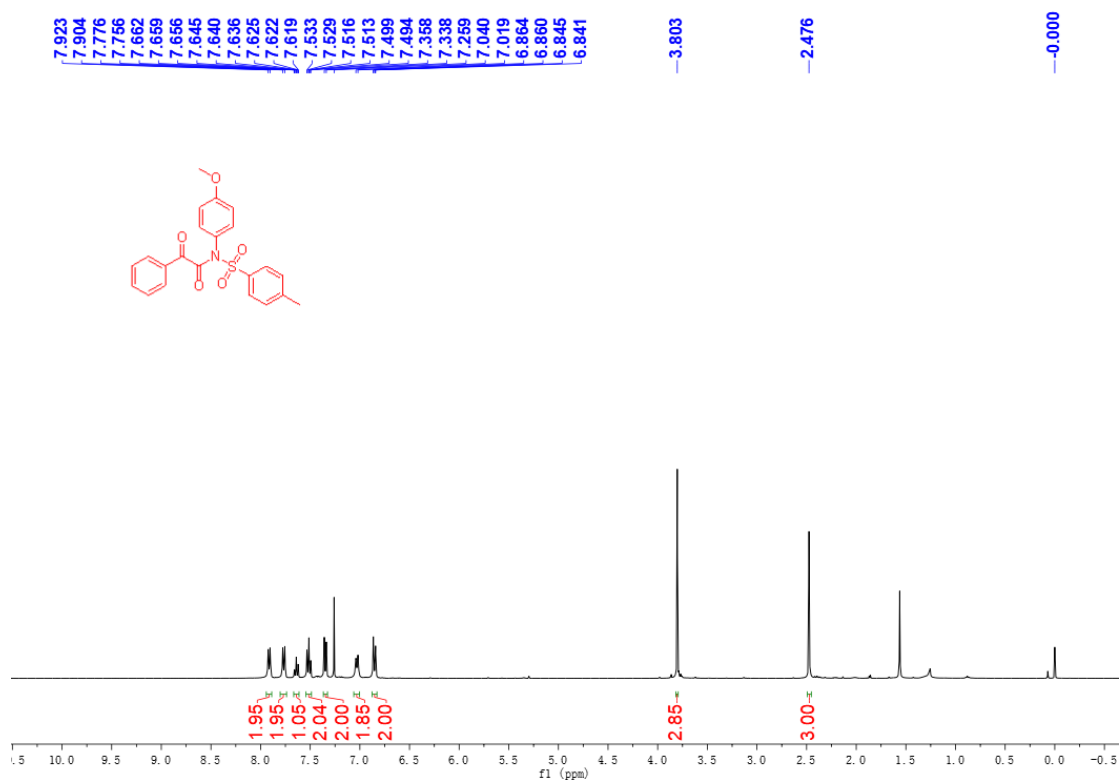

Figure S71. <sup>1</sup>H NMR spectrum (400 MHz, CDCl<sub>3</sub>) of *N*-(4-methoxyphenyl)-2-oxo-2-phenyl-*N*-tosylacetamide (**2p**)

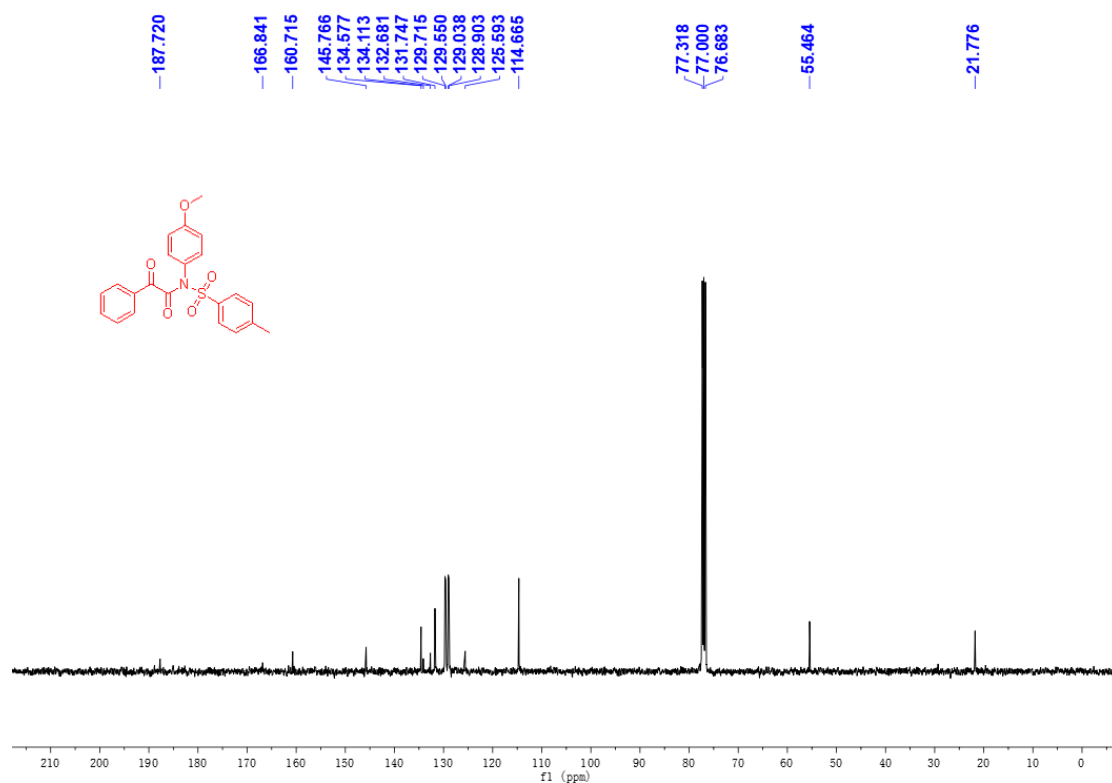

Figure S72. <sup>13</sup>C NMR spectrum (101 MHz, CDCl<sub>3</sub>) of *N*-(4-methoxyphenyl)-2-oxo-2-phenyl-*N*-tosylacetamide (**2p**)

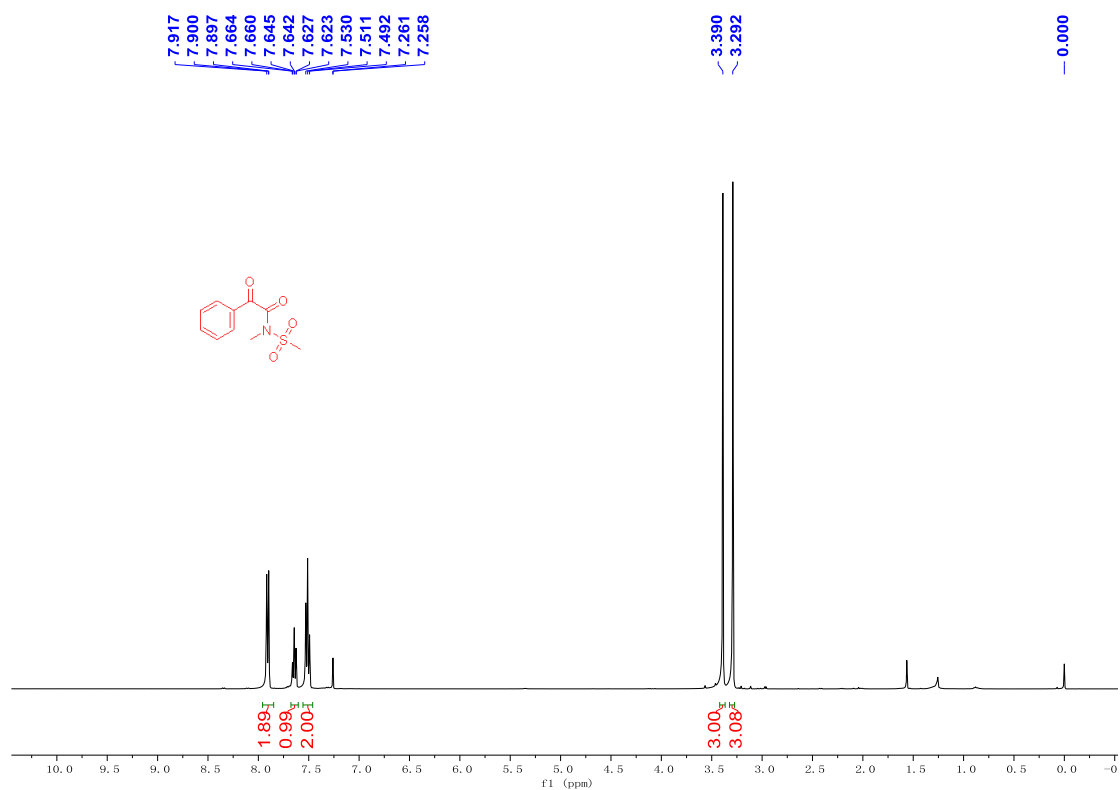

Figure S73.  $^1\text{H}$  NMR spectrum (400 MHz,  $\text{CDCl}_3$ ) of *N*-methyl-*N*-(methylsulfonyl)-2-oxo-2-phenylacetamide (**2s**)

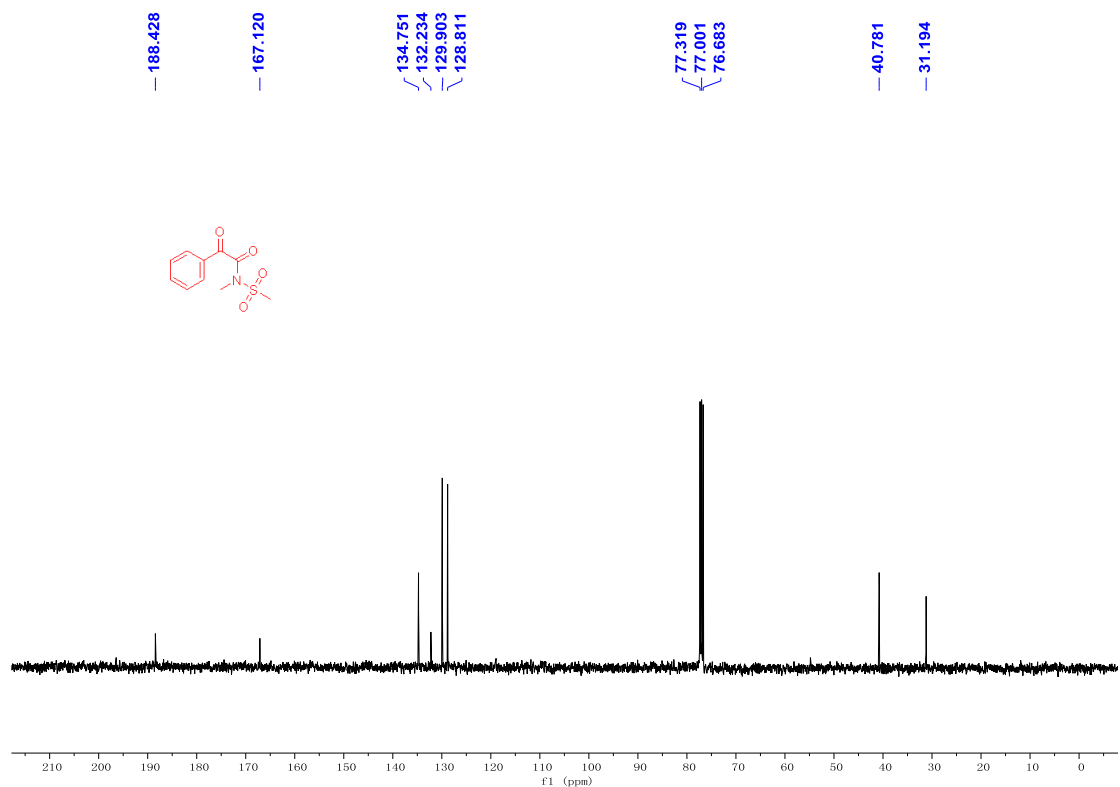

Figure S74.  $^{13}\text{C}$  NMR spectrum (101 MHz,  $\text{CDCl}_3$ ) of *N*-methyl-*N*-(methylsulfonyl)-2-oxo-2-phenylacetamide (**2s**)

Copies of NMR spectra of compounds **3** and **4**

*N*-Cyclohexyl-2-phenyl-*N*-tosylacetamide (**31**)

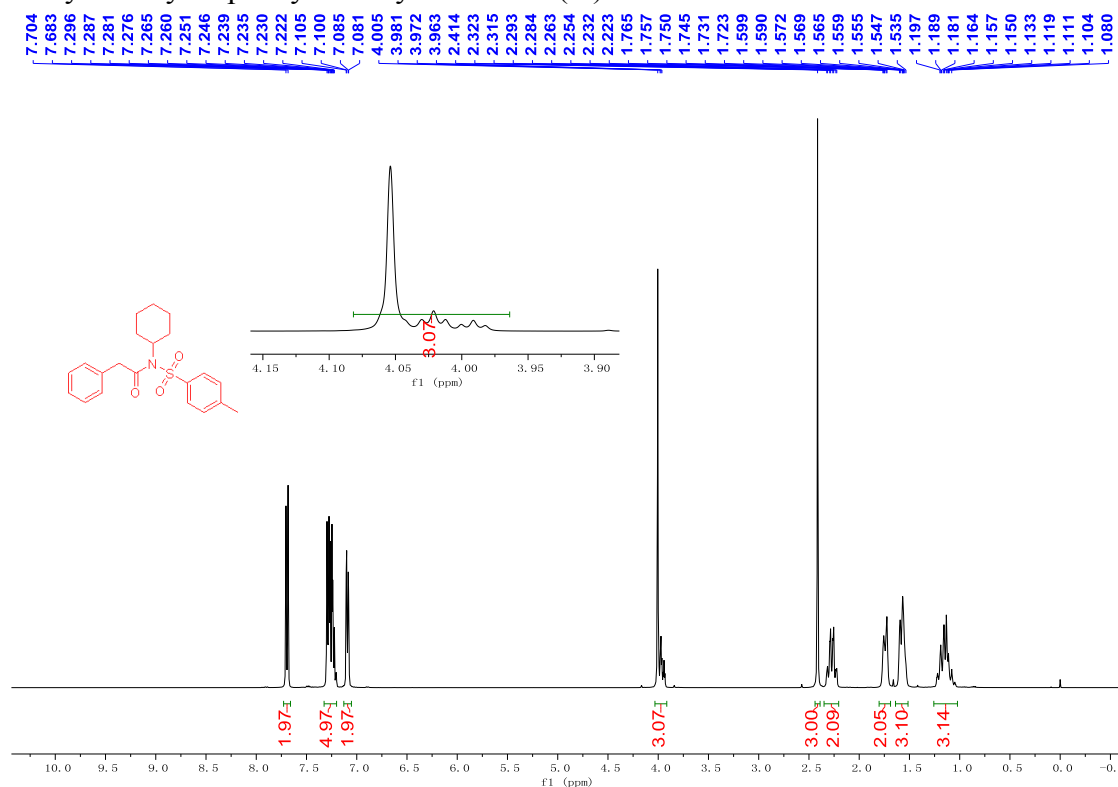

Figure S75. <sup>1</sup>H NMR spectrum (400 MHz, CDCl<sub>3</sub>) of *N*-cyclohexyl-2-phenyl-*N*-tosylacetamide (**31**)

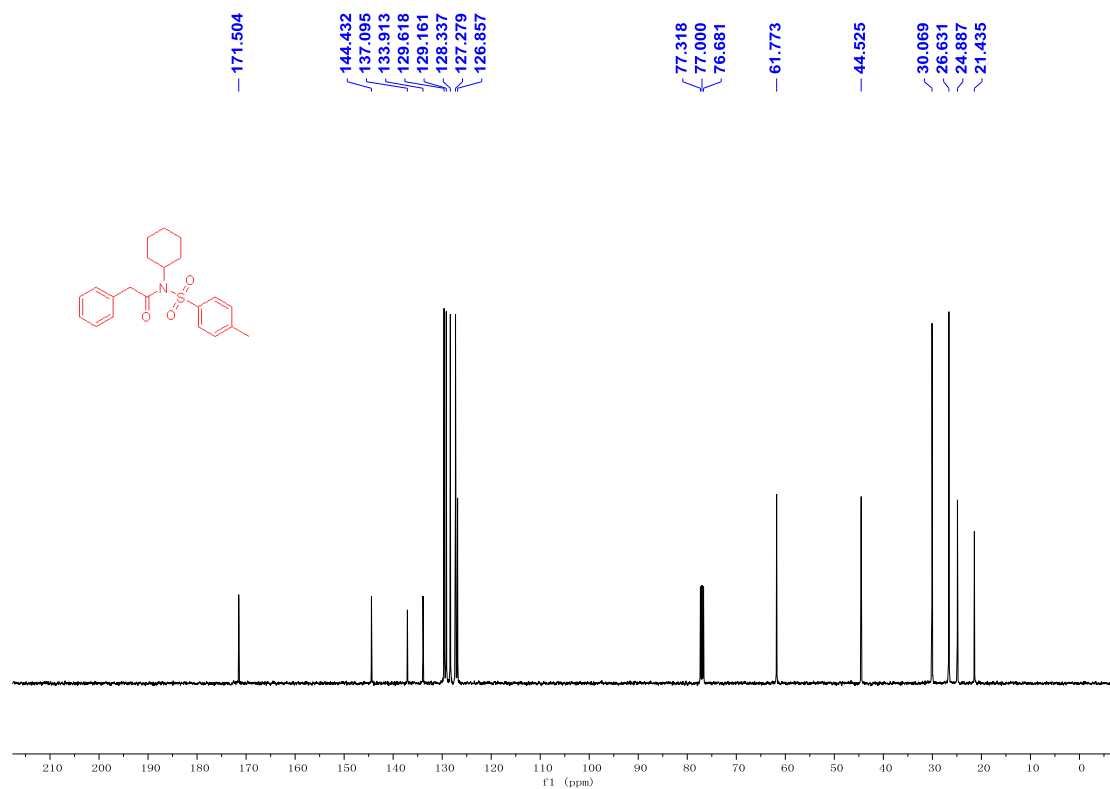

Figure S76. <sup>13</sup>C NMR spectrum (101 MHz, CDCl<sub>3</sub>) of *N*-cyclohexyl-2-phenyl-*N*-tosylacetamide (**31**)

2-Hydroxy-*N*-methyl-2-phenyl-*N*-tosylacetamide (**4a**)

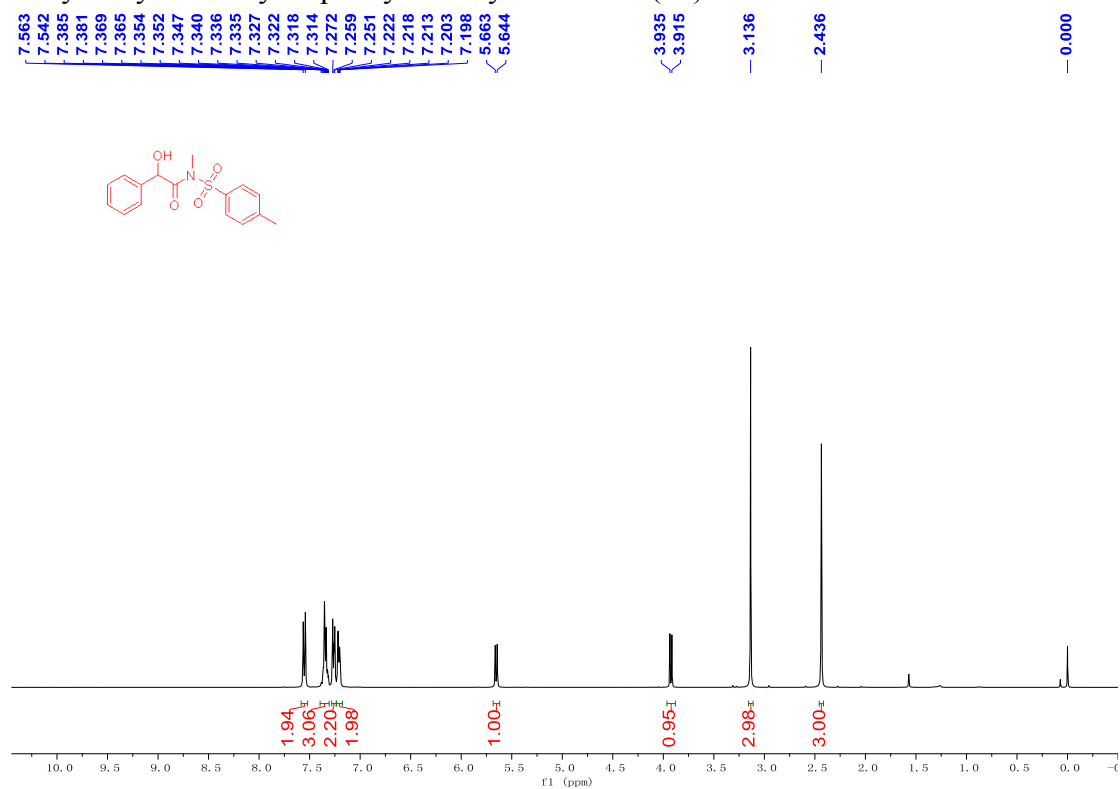

Figure S77. <sup>1</sup>H NMR spectrum (400 MHz, CDCl<sub>3</sub>) of 2-hydroxy-*N*-methyl-2-phenyl-*N*-tosylacetamide (**4a**)

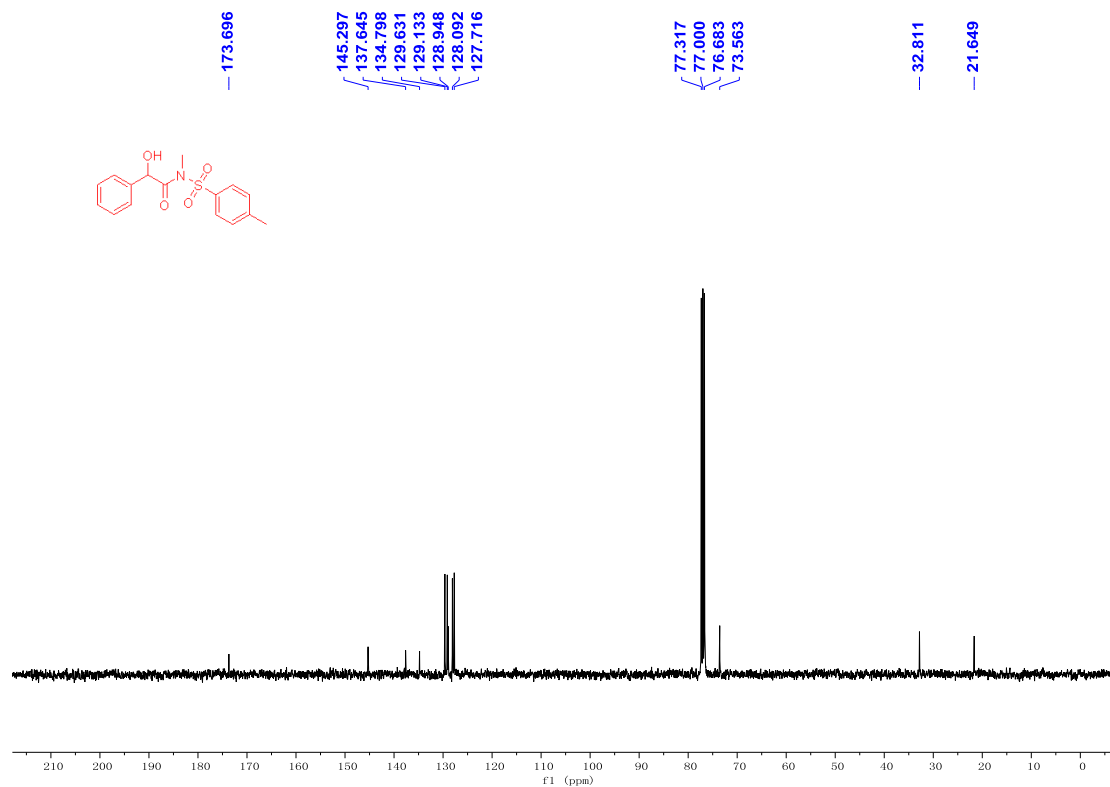

Figure S78. <sup>13</sup>C NMR spectrum (101 MHz, CDCl<sub>3</sub>) of 2-hydroxy-*N*-methyl-2-phenyl-*N*-tosylacetamide (**4a**)

## Copies of HRMS spectra of unknown compounds 2

### *N*-Methyl-2-oxo-2-phenyl-*N*-(phenylsulfonyl)acetamide (**2b**)

HRMS (ESI-TOF)  $m/z$ :  $[M + Na]^+$  calcd for  $C_{15}H_{13}NNaO_4S^+$  326.0457, found 326.0451.

1\_20201222174700 #4370 RT: 24.48 AV: 1 NL: 5.85E8  
T: FTMS + c ESI Full ms [50.0000-750.0000]

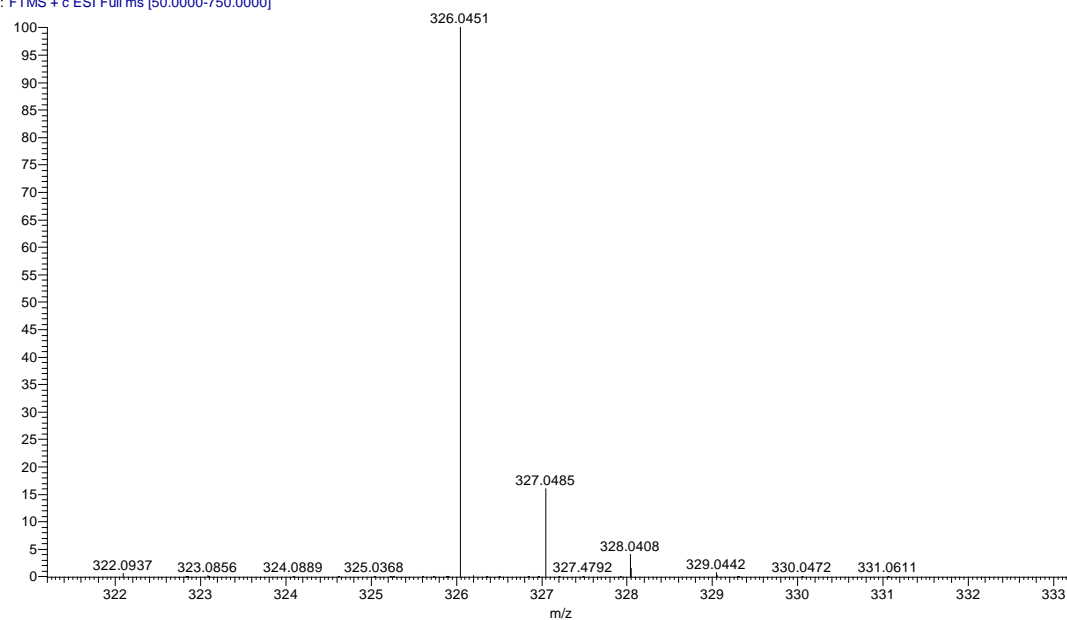

Figure S79. HRMS spectrum of *N*-methyl-2-oxo-2-phenyl-*N*-(phenylsulfonyl)acetamide (**2b**)

### *N*-Methyl-*N*-((4-nitrophenyl)sulfonyl)-2-oxo-2-phenylacetamide (**2d**)

HRMS (ESI-TOF)  $m/z$ :  $[M + H]^+$  calcd for  $C_{15}H_{13}N_2O_6S^+$  349.0489, found 349.0480.

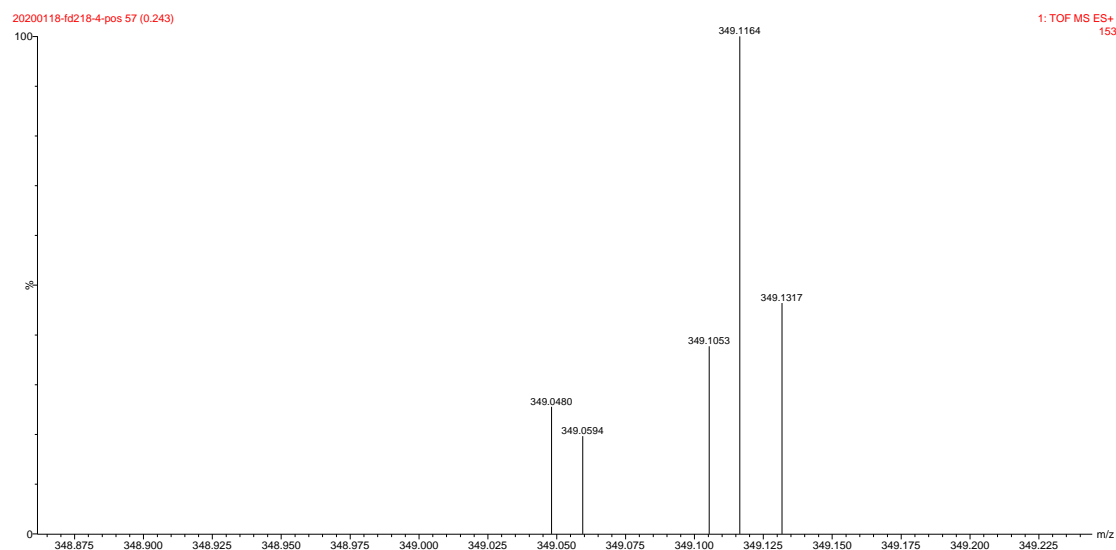

Figure S80. HRMS spectrum of *N*-methyl-*N*-((4-nitrophenyl)sulfonyl)-2-oxo-2-phenylacetamide (**2d**)

2-(4-Fluorophenyl)-*N*-methyl-2-oxo-*N*-tosylacetamide (**2f**)

HRMS (ESI-TOF)  $m/z$ :  $[M + H]^+$  calcd for  $C_{16}H_{15}FNO_4S^+$  336.0700, found 336.0698.

1\_20201222174700 #5001 RT: 27.97 AV: 1 SB: 161 28.09-28.95 NL: 2.22E6  
T: FTMS + c ESI Full ms [50.0000-750.0000]

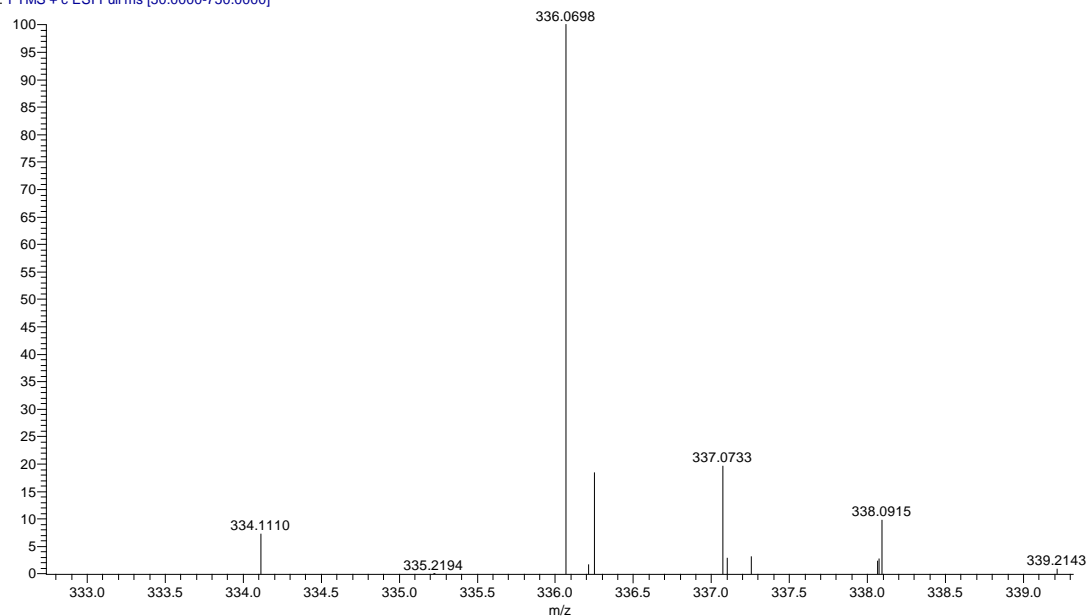

Figure S81. HRMS spectrum of 2-(4-fluorophenyl)-*N*-methyl-2-oxo-*N*-tosylacetamide (**2f**)

2-(4-Chlorophenyl)-*N*-methyl-2-oxo-*N*-tosylacetamide (**2g**)

HRMS (ESI-TOF)  $m/z$ :  $[M + Na]^+$  calcd for  $C_{16}H_{14}ClNNaO_4S^+$  374.0224, found 374.0220.

1\_20201222174700 #5493 RT: 30.65 AV: 1 SB: 139 30.16-30.56 . 30.73-31.09 NL: 7.96E7  
T: FTMS + c ESI Full ms [50.0000-750.0000]

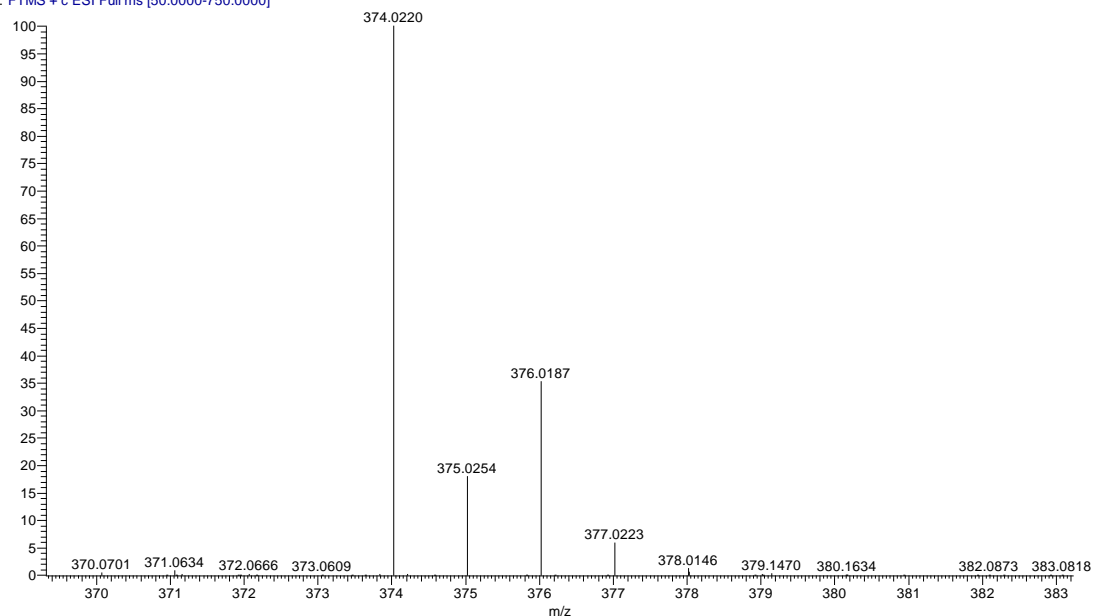

Figure S82. HRMS spectrum of 2-(4-chlorophenyl)-*N*-methyl-2-oxo-*N*-tosylacetamide (**2g**)



2-(4-Bromophenyl)-*N*-methyl-2-oxo-*N*-tosylacetamide (**2h**)

HRMS (ESI-TOF)  $m/z$ :  $[M + Na]^+$  calcd for  $C_{16}H_{14}BrNNaO_4S^+$  417.9719, found 417.9714.

1\_20201222174700 #5600 RT: 31.23 AV: 1 SB: 165 30.73-31.17 . 31.30-31.76 NL: 1.74E7  
T: FTMS + c ESI Full ms [50.0000-750.0000]

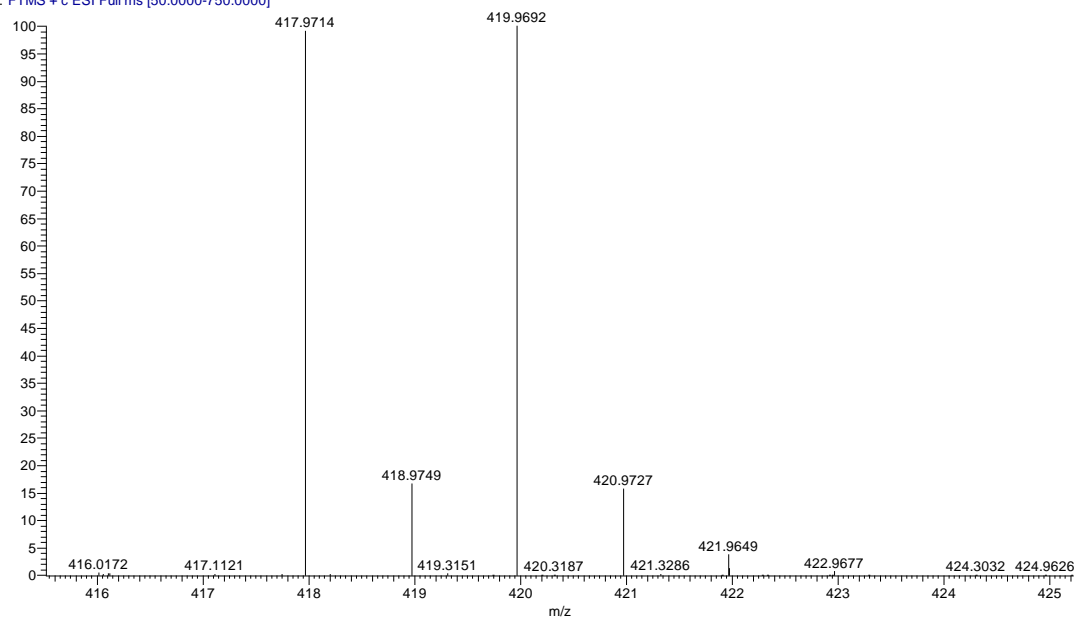

Figure S83. HRMS spectrum of 2-(4-bromophenyl)-*N*-methyl-2-oxo-*N*-tosylacetamide (**2h**)

*N*-Ethyl-2-oxo-2-phenyl-*N*-tosylacetamide (**2j**)

HRMS (ESI-TOF)  $m/z$ :  $[M + Na]^+$  calcd for  $C_{17}H_{17}NNaO_4S^+$  354.0770, found 354.0765.

1\_20201222174700 #5087 RT: 28.43 AV: 1 SB: 165 30.73-31.17 . 31.30-31.76 NL: 2.10E8  
T: FTMS + c ESI Full ms [50.0000-750.0000]

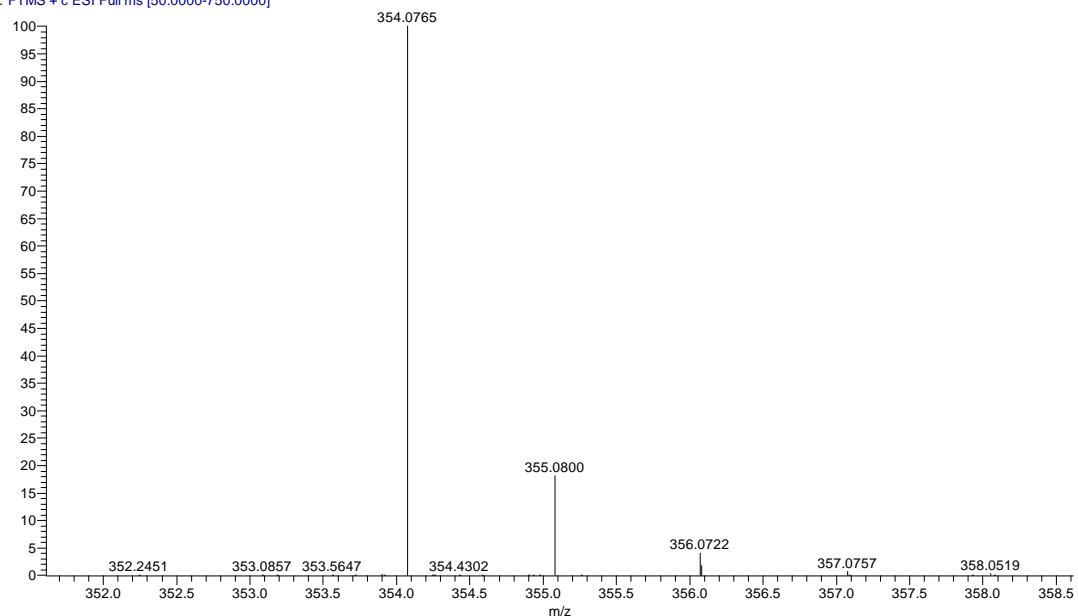

Figure S84. HRMS spectrum of *N*-ethyl-2-oxo-2-phenyl-*N*-tosylacetamide (**2j**)

*N*-Butyl-2-oxo-2-phenyl-*N*-tosylacetamide (**2k**)

HRMS (ESI-TOF)  $m/z$ :  $[M + Na]^+$  calcd for  $C_{19}H_{21}NNaO_4S^+$  382.1083, found 382.1077.

1\_20201222174700 #5788 RT: 32.26 AV: 1 SB: 165 30.73-31.17 . 31.30-31.76 NL: 2.51E8  
T: FTMS + c ESI Full ms [50.0000-750.0000]

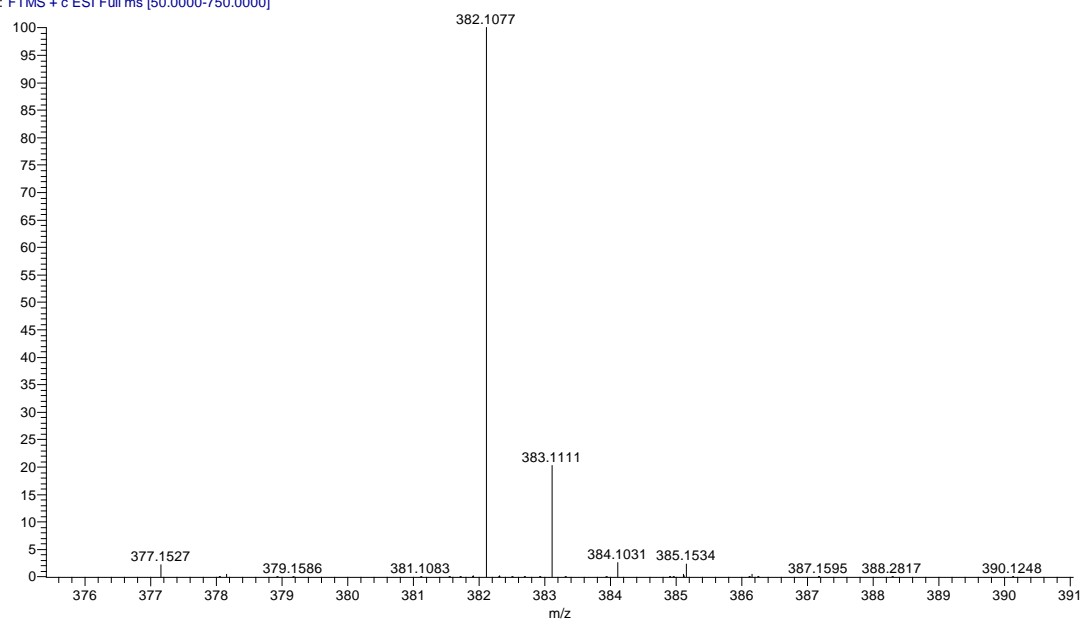

Figure S85. HRMS spectrum of *N*-butyl-2-oxo-2-phenyl-*N*-tosylacetamide (**2k**)

*N*-Cyclopropyl-2-oxo-2-phenyl-*N*-tosylacetamide (**2m**)

HRMS (ESI-TOF)  $m/z$ :  $[M + Na]^+$  calcd for  $C_{18}H_{17}NNaO_4S^+$  366.0770, found 366.0763.

1\_20201222174700 #5015 RT: 28.05 AV: 1 SB: 139 30.16-30.56 . 30.73-31.09 NL: 4.09E8  
T: FTMS + c ESI Full ms [50.0000-750.0000]

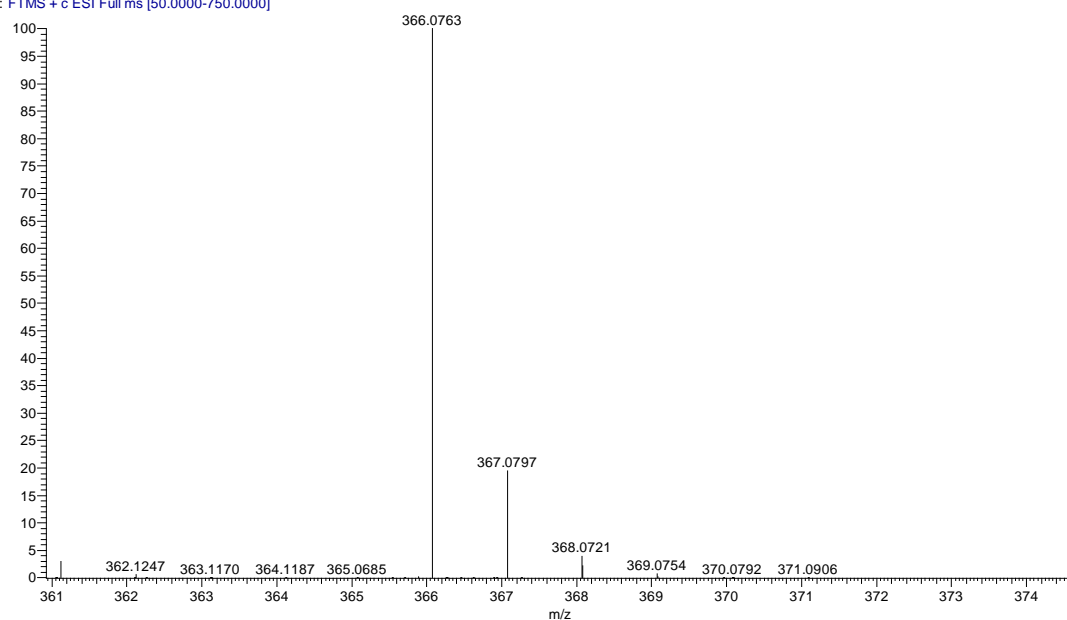

Figure S86. HRMS spectrum of *N*-cyclopropyl-2-oxo-2-phenyl-*N*-tosylacetamide (**2m**)

## Copies of HRMS spectra of compounds **3** and **4**

### *N*-Cyclohexyl-2-phenyl-*N*-tosylacetamide (**3**)

HRMS (ESI-TOF)  $m/z$ :  $[M + H]^+$  calcd for  $C_{21}H_{26}NO_3S^+$  372.1628 Found 372.1633.

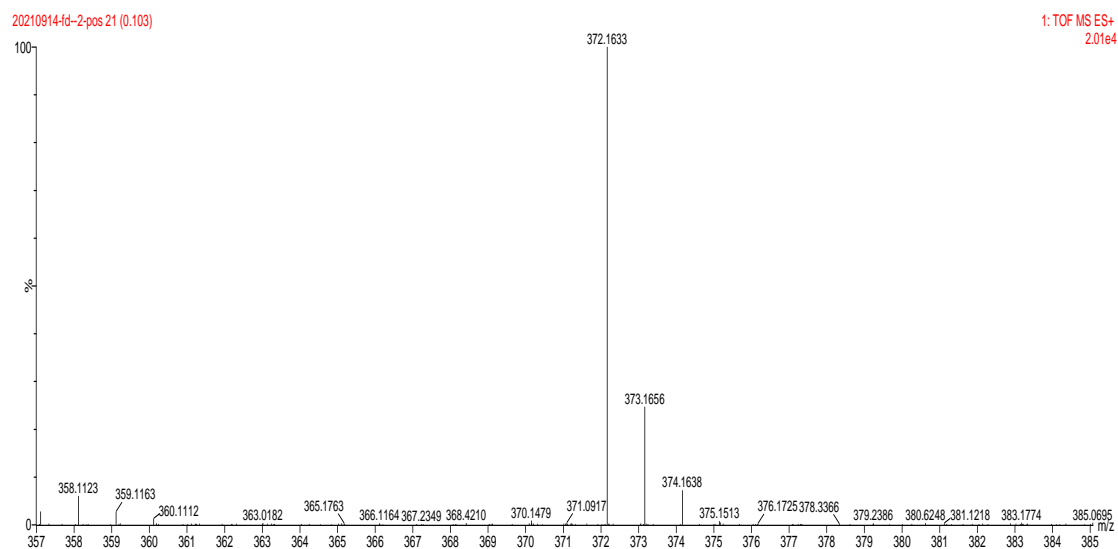

Figure S87. HRMS spectrum of *N*-cyclohexyl-2-phenyl-*N*-tosylacetamide (**3**)

### 2-Hydroxy-*N*-methyl-2-phenyl-*N*-tosylacetamide (**4a**)

HRMS (ESI-TOF)  $m/z$ :  $[M + Na]^+$  calcd for  $C_{16}H_{17}NaNO_4S^+$  342.0770, found 342.0778.

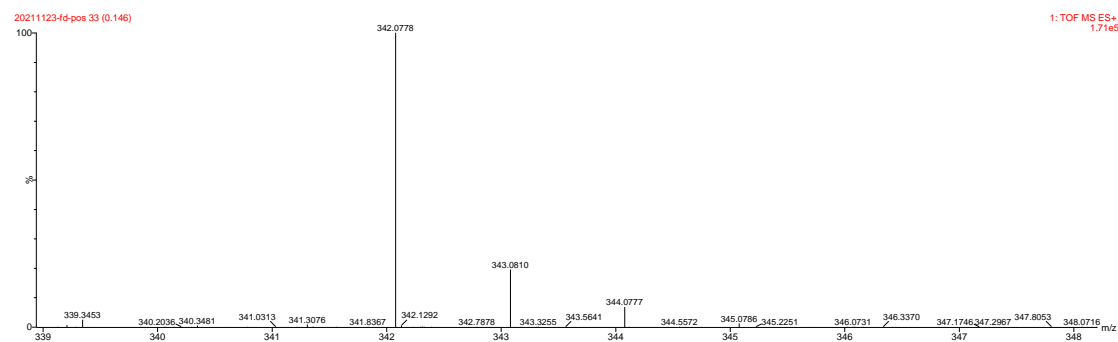

Figure S88. HRMS spectrum of 2-hydroxy-*N*-methyl-2-phenyl-*N*-tosylacetamide (**4a**)
